1 Phylogenetic and Phenotypic Characterization of the Energy-taxis Receptor Aer in *Pseudomonas*

2

3 Sean C. Booth<sup>a##</sup> and Raymond J. Turner<sup>a#</sup>

4

5 Department of Biological Sciences, University of Calgary, Calgary, AB, Canada<sup>a</sup>

6

7 #Address correspondence Raymond J. Turner, [turnerr@ucalgary.ca](mailto:turnerr@ucalgary.ca) and Sean C. Booth,

8 [scbooth@ucalgary.ca](mailto:scbooth@ucalgary.ca)

9 \* Current address: Singapore Centre for Environmental Life Sciences Engineering, Nanyang

10 Technological University, Singapore

11 +1-403-220-3581

12 Running Title: *Pseudomonas* Energy-Taxis Receptors

13 Keywords: chemotaxis, *Pseudomonas*, aerotaxis, energy-taxis, phylogenetics, motility

14

15 **Abstract**

16 Chemotaxis allows bacteria to sense gradients in their environment and respond by  
17 directing their swimming. Aer is a receptor that, instead of responding to a specific  
18 chemoattractant, allows bacteria to sense cellular energy production and move towards  
19 favourable environments. In *Pseudomonas*, the number of apparent Aer homologs differed  
20 between the only two species it had been characterized in, *P. aeruginosa* and *P. putida*. Here we  
21 combined bioinformatic approaches with deletional mutagenesis in *P. pseudoalcaligenes* KF707  
22 to further characterize Aer. It was determined that the number of Aer homologs varies between  
23 0-4 throughout the *Pseudomonas* genus, and they were phylogenetically classified into 5  
24 subgroups. We also used sequence analysis to show that these homologous receptors differ not in  
25 the ligand binding or signal transduction domains, but in the region in between. The most  
26 prevalent homolog was thus differentiated from *Escherichia coli* Aer by its different domain  
27 architecture. Genetic analysis also indicated that some Aer homologs have likely been subject to  
28 horizontal transfer. *P. pseudoalcaligenes* KF707 was unique among species for having three Aer  
29 homologs as well as the distinct chemoreceptor Aer-2. Phenotypic characterization in this  
30 species showed the most prevalent homolog was key, but not essential for energy-taxis. This  
31 study demonstrates that energy-taxis in *Pseudomonas* varies between species and provides a new  
32 naming convention and associated phylogenetic details for Aer chemoreceptors.

33 **Importance**

34 Energy-taxis enables *Pseudomonas* to swim towards favourable environments through  
35 sensing its cellular energy state via the receptor ‘Aer’. In *Escherichia coli* there is only one  
36 version of this gene but *Pseudomonads* appeared to have multiple. Here we show that there are 5

37 different homologs in *Pseudomonas* and that individual species can have between zero and four  
38 Aer homologs. These homologs do not differ in their ligand-binding region or signal transduction  
39 module, but in the region between them. Only one homolog has a HAMP domain like *E. coli* Aer,  
40 making the other homologs interesting among chemoreceptors for not having this domain. In *P.*  
41 *pseudoalcaligenes* KF707, which has a unique complement of Aer homologs and other  
42 chemoreceptors, all Aer homologs influenced energy-taxis.

43

#### 44 **Introduction**

45 Chemotaxis is the ability to sense and swim along chemical gradients, and is a widespread,  
46 important behaviour in bacteria (1). Canonically, it functions by extracellular compounds  
47 interacting with membrane-bound chemoreceptors, generally called methyl-accepting  
48 chemotaxis proteins (MCPs), causing a phosphorylation signal cascade through CheA and CheY  
49 to alter the direction of flagellar rotation (1), which in turn allows the cell to direct swimming  
50 through concentration gradients. The first chemoreceptors were characterized in *E. coli*, but now  
51 many more have been described, particularly in *Pseudomonas* (2). Many receptors for specific  
52 ligands are being identified through a high-throughput approach (3), but some specialized  
53 receptors do not recognize extracellular signals.

54 Energy-taxis is a behavior in bacteria that enables swimming towards optimal environments  
55 for producing energy by sensing intracellular signals (4). This can mean regions with higher  
56 concentrations of metabolizable carbon sources, or regions with higher oxygen concentrations.  
57 This has resulted in the conflation of directed swimming towards oxygen, called aerotaxis, with  
58 energy-taxis. This is most evident in the naming of the energy-taxis receptor ‘Aer’. First  
59 described in *E. coli* (5, 6), this receptor does not sense oxygen concentrations through direct

60 binding, instead it detects the cellular energy state through sensing the redox state of a flavin  
61 adenine dinucleotide (FAD) co-factor (7). An orthologous receptor was also discovered in *P.*  
62 *aeruginosa*, along with a second distinct protein, deemed Aer-2 (formerly known as McpB), and  
63 both contributed to aerotaxis (8). In *P. putida* three *aer*-like genes were found, but only one was  
64 important for energy-taxis (9). Unfortunately, this chemoreceptor was given the numerical name  
65 ‘Aer2’ despite it referring to a completely different protein than the previously named Aer-2. In  
66 this study, we sought to understand the variation in Aer chemoreceptors in the genus  
67 *Pseudomonas* and provide phylogenetic data to rename the multiple Aer homologs. Additionally,  
68 we aimed to investigate the functions of Aer and Aer-2 through deletional mutagenesis in a  
69 species they have yet to be investigated in, *P. pseudoalcaligenes* KF707.

70 In *Pseudomonas*, the energy-taxis receptor Aer has been characterized using gene inactivated  
71 mutants of 2 species, first in *P. putida* PRS2000 (10), then in *P. aeruginosa* PA01 (8), *P. putida*  
72 KT2440 (9) and *P. putida* F1 (11). In *P. putida* KT2440, three genes with high sequence identity  
73 to Aer from *P. aeruginosa* PA01 were individually disrupted, and ‘Aer2’ was the only one found  
74 to mediate energy-taxis (9). Though this species had two more potential Aer homologs than *P.*  
75 *aeruginosa*, no comparison of the genes or gene products was made. A better understanding of  
76 energy-taxis in *Pseudomonas* and why some species have multiple similar copies of the same  
77 chemoreceptor could thus be obtained by studying how the number and amino acid sequences of  
78 Aer homologs varies in the genus and which are functional in other species.

79 In *P. aeruginosa*, Aer-2 was originally implicated with Aer as an aerotaxis receptor (8), but  
80 its function remains uncertain, despite its ability to directly bind oxygen (12). The *aer-2* gene is  
81 part of the *che2* gene cluster, which is preceded by another chemoreceptor, *mcpA* (13). This gene  
82 was demonstrated to mediate positive chemotaxis towards tetrachloroethylene (TCE) and



83 renamed *cttP* (14). This effect was detectable only in a strain with disruptions to all 3 amino  
84 acids receptors (*pctABC*). Compared to other MCPs, CttP has a strange domain architecture; it  
85 has no clear ligand binding region and has a C-terminal extension. In *E. coli*, its MCPs can  
86 mediate attractant and repellent responses to phenol that do not involve their ligand binding  
87 regions (15). This implies the observed taxis to TCE may also have been fortuitous and that  
88 CttP has some other function. As *cttP* is located beside the *che2* gene cluster which contains Aer-  
89 2, we hypothesized that in addition to Aer, CttP and Aer-2 may also have a role in energy-taxis.

90 In this study we present a combination of a bioinformatic characterization of Aer throughout  
91 the *Pseudomonas* genus with a genetic knockout characterization of three Aer homologs, Aer-2  
92 and CttP in *P. pseudoalcaligenes* KF707. A phylogeny of Aer was built using sequences  
93 obtained from 65 *Pseudomonas* species providing insight into the distribution throughout the  
94 genus and enabling the definition of 5 ‘Aer’ subgroups. Only *P. pseudoalcaligenes* KF707 had  
95 the unique feature of possessing three Aer homologs, Aer-2 and CttP making it the ideal  
96 candidate to investigate if these receptors had related functions. Using single and combinatory  
97 deletion mutants, all five of these genes were found to have some influence on energy-taxis, with  
98 the most common Aer homolog in the genus playing the most important role. Together these  
99 results provide a definition of the Aer energy-taxis receptor as a family with varied distribution  
100 in *Pseudomonas* and imply some role for Aer-2 and CttP in energy-taxis.

101

## 102 **Results**

### 103 **Bioinformatics Results**

104 Previous studies suggested that the number of Aer-like receptors varied between  
105 *Pseudomonas* species, but it was unknown how much this number varied, how much their amino

106 acid sequences varied, and how these Aer-like receptors were related phylogenetically. To  
107 address these questions and more, the Aer sequences from 65 *Pseudomonas* species were  
108 selected for analysis. Species with completely sequenced genomes were selected, but for those  
109 with many strains only a few representatives that have been highly studied were included (e.g. *P.*  
110 *aeruginosa*). Species with incomplete (draft) sequences were also included in an attempt to  
111 ensure representation from all major *Pseudomonas* clades, based on the phylogenies of Bodilis *et*  
112 *al* and Gomila *et al* (16, 17). 144 protein sequences were obtained from the NCBI database using  
113 the *P. aeruginosa* PA01 Aer sequence (NP\_250252.1) as a BLAST (18) query sequence. All hits  
114 with >95% sequence coverage were included (E values <10<sup>-100</sup>). These sequences were aligned  
115 using COBALT (19) as this alignment algorithm ensures that conserved domains are aligned  
116 despite a lack of similarity elsewhere in the sequence. This was ideal for the Aer sequences as,  
117 like other chemoreceptors, they are conserved in the C-terminal signaling region but less  
118 conserved in the rest of the protein, making the C-terminal region important for the alignment. A  
119 maximum likelihood phylogeny was constructed using PHYML (20), as implemented by the  
120 South of France Bioinformatics Platform (21). Through this approach, two phylogenies were  
121 generated, one using only the *Pseudomonas* sequences and one which included Aer from *E. coli*  
122 K12 as an outgroup. These two unrooted phylogenies were examined (Supplementary Figures 1  
123 and 2) and the placement of *E. coli* Aer was used to root the *Pseudomonas*-only tree  
124 (Supplementary Figure 3). The rooted phylogeny allowed clear delineation of Aer sequences  
125 into subgroups.

## 126 Phylogenetic Grouping of Aer

127 The alignment of *Pseudomonas* Aer sequences was ordered based on the maximum  
128 likelihood phylogeny (see alignment and tree in supplementary material). Inspection of this

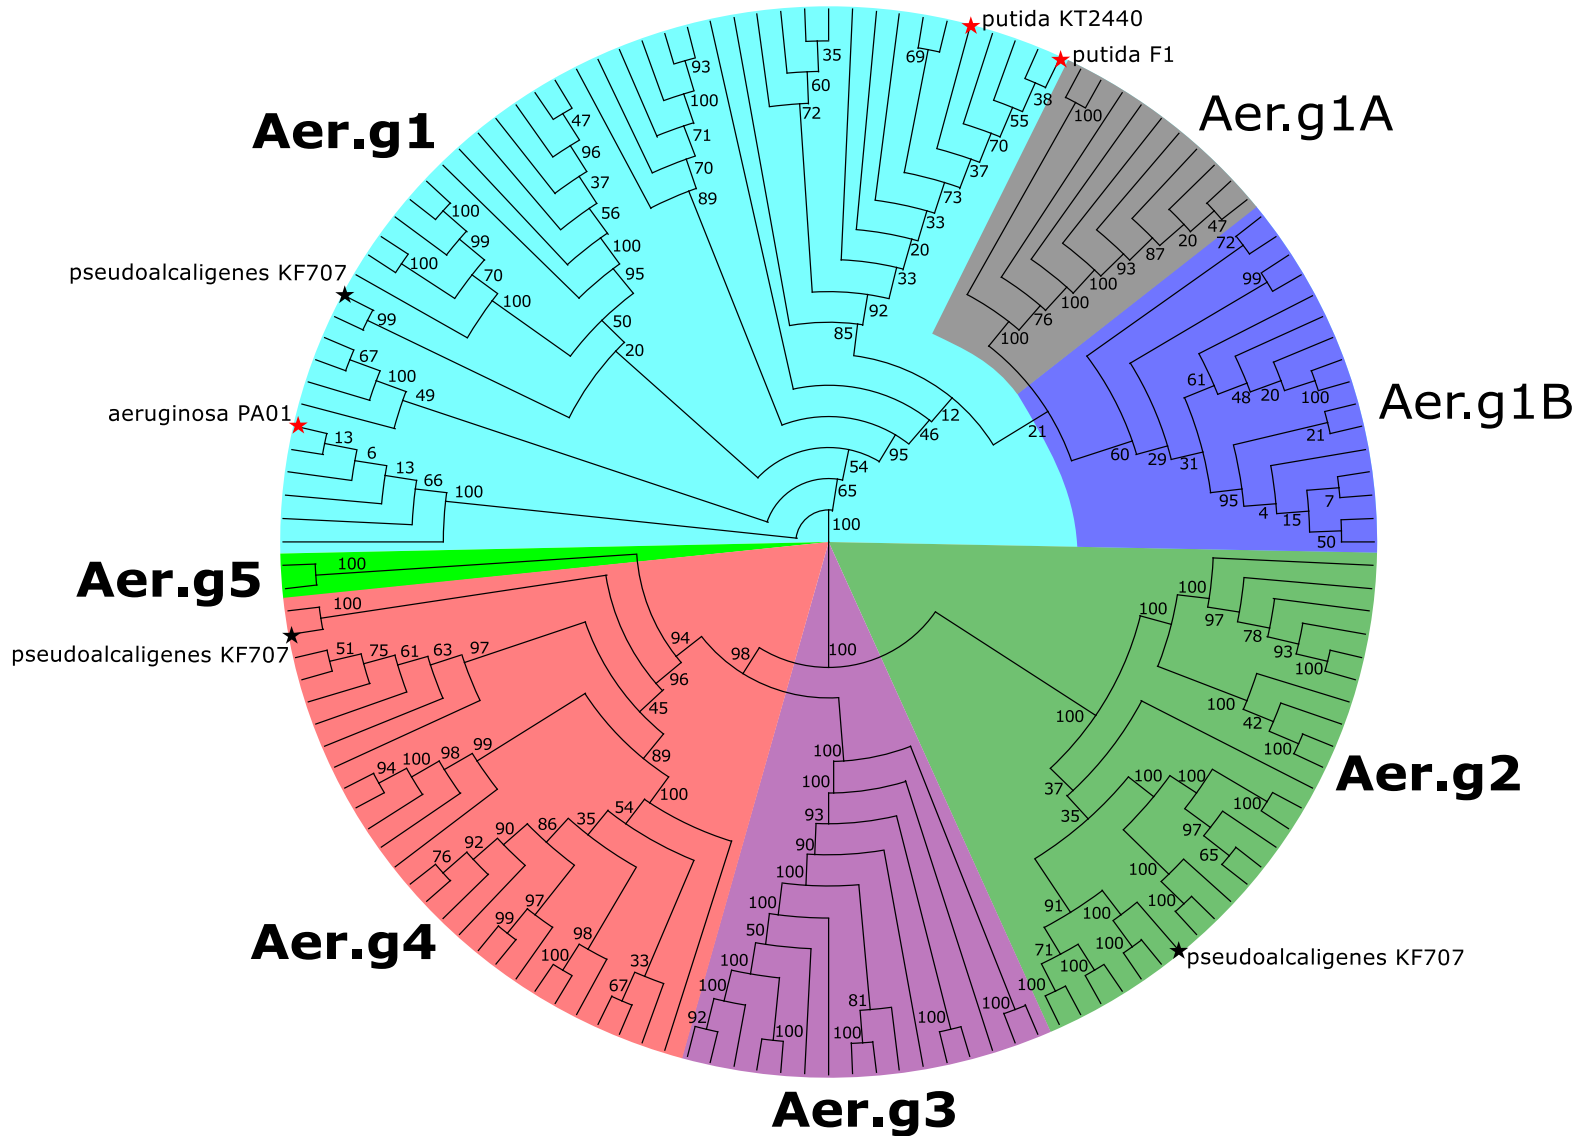

Figure 1: Maximum-Likelihood consensus cladogram showing phylogenetic relationship between Aer protein sequences from *Pseudomonas* species. Sequences were grouped according to branching pattern and inspection of the alignment, and were confirmed in subsequent analysis, see following figures and text for details. Only previously characterized Aer sequences (red stars) and sequences from *P. pseudoalcaligenes* KF707 (black stars) are labeled. For complete tree with branch lengths and all labels see Supplementary Figure 3. Tree was generated unrooted, then the root placed based on comparison between the unrooted tree and a tree rooted to Aer from *E. coli*, see Supplementary Figures 1 and 2 for details. Numbers along branches indicate bootstrap support values from 100 replicates.

129 organized alignment implied that there are several sub-families of Aer homologs (Figure 1).  
130 Initially, seven groups were identified based on the alignment and tree branching. These groups  
131 were sub-aligned by themselves, then analyzed to determine if the group assignments were  
132 accurate. Manual inspection and Sequence Harmony / Multi-Relief (SHMR) demonstrated that  
133 the seven groups could be reduced to just five clear subgroupings. SHMR is a pair of algorithms  
134 that takes as input a pair of alignments and determines, for each AA position, whether that AA is  
135 conserved within each group, and whether it is divergent between the two groups, giving each  
136 AA position a score (22). A score of 1 indicates perfect within-group conservation and between-  
137 group divergence. Each pair of groups was compared in this fashion, then their results compared  
138 by determining what percent of AAs were conserved within a group but divergent between the  
139 groups (Supplementary Figure 4). AA positions with a multi-relief weight score  $>0.8$  were  
140 accepted as fitting these criteria (cutoff is based on the recommendations of the SHMR authors  
141 (22)). Most intergroup comparisons indicated that 25-35% of AAs were above the distinction  
142 cutoff, indicating the group distinctions were correct. Conversely, two proposed subgroupings of  
143 Aer.g1 were demonstrated to differ from the rest of Aer.g1 by much less than any other between-  
144 group comparisons as only 10% of AAs were above the cutoff. These two groups were thus  
145 included as part of Aer.g1, reducing the total number of groups to five. Throughout this process,  
146 Aer.g5 was consistently excluded as it only contains 2 sequences, which are highly divergent  
147 from all others.

#### 148 Distribution of Groups within *Pseudomonas*

149 To determine the prevalence of each Aer homolog group within the *Pseudomonas* genus,  
150 the number of homologs from each group that each species possessed was counted and a  
151 hierarchically clustered heatmap was generated (Supplementary Figure 5). Aer-2 and CttP were

152 also counted and included. This analysis showed that all included species, except *P. denitrificans*  
153 ATCC13867, had an Aer.g1 homolog. Conversely, only species related to *P. aeruginosa* had  
154 Aer-2 and CttP, which were always found together. There were very few species that had Aer-  
155 2/CttP and multiple Aer homologs, only *Pseudomonas* sp 21, *P. nitroreducens* HBP1, *P.*  
156 *resinovorans* NBRC 106553 and *P. pseudoalcaligenes* KF707 fit this category. Duplication of  
157 subgroup genes within a single strain were rarer than possession of homologs from multiple  
158 groups and only Aer.g1, Aer.g2 and Aer.g3 were duplicated. Aer.g1 was only duplicated in *P.*  
159 *fluorescens* and related subgroups 1-8 (17), and these duplications matched the prior subdivision  
160 of Aer.g1 into Aer.g1A and Aer.g1B. Duplications of Aer.g2 occurred only (and always) in *P.*  
161 *stutzeri* and the closely related *P. balearica*. Unlike the other duplications, these were tandem  
162 duplications. Duplications of Aer.g3 only occurred in *P. protegens* CHA0 and Pf-5. No single  
163 species had a representative from all groups, though *P. mendocina* NK-01 was only missing  
164 Aer.g2 and Aer-2/CttP, and *P. pseudoalcaligenes* KF707 was only missing Aer.g3 and Aer.g5.

165 At the strain level, there were instances of intraspecies differences. Only half of the *P.*  
166 *parafulva* strains had an Aer.g2 homolog and only half of the *P. fluorescens* strains had identical  
167 Aer homolog profiles. Three of four *P. putida* strains had the same Aer homologs, but *P. putida*  
168 HB3267 had one extra. *P. mendocina* ymp and NK-01 differed as the latter possesses the rare  
169 Aer.g5. The other strain with this homolog, *P. pseudoalcaligenes* AD6, was quite different than  
170 KF707 as it also did not have an Aer.g2 homolog nor Aer-2/CttP. This was the species with the  
171 most inter-strain variation as the third strain included in the analysis, *P. pseudoalcaligenes*  
172 CECT5344, only possessed a single Aer.g1 homolog.

173

174

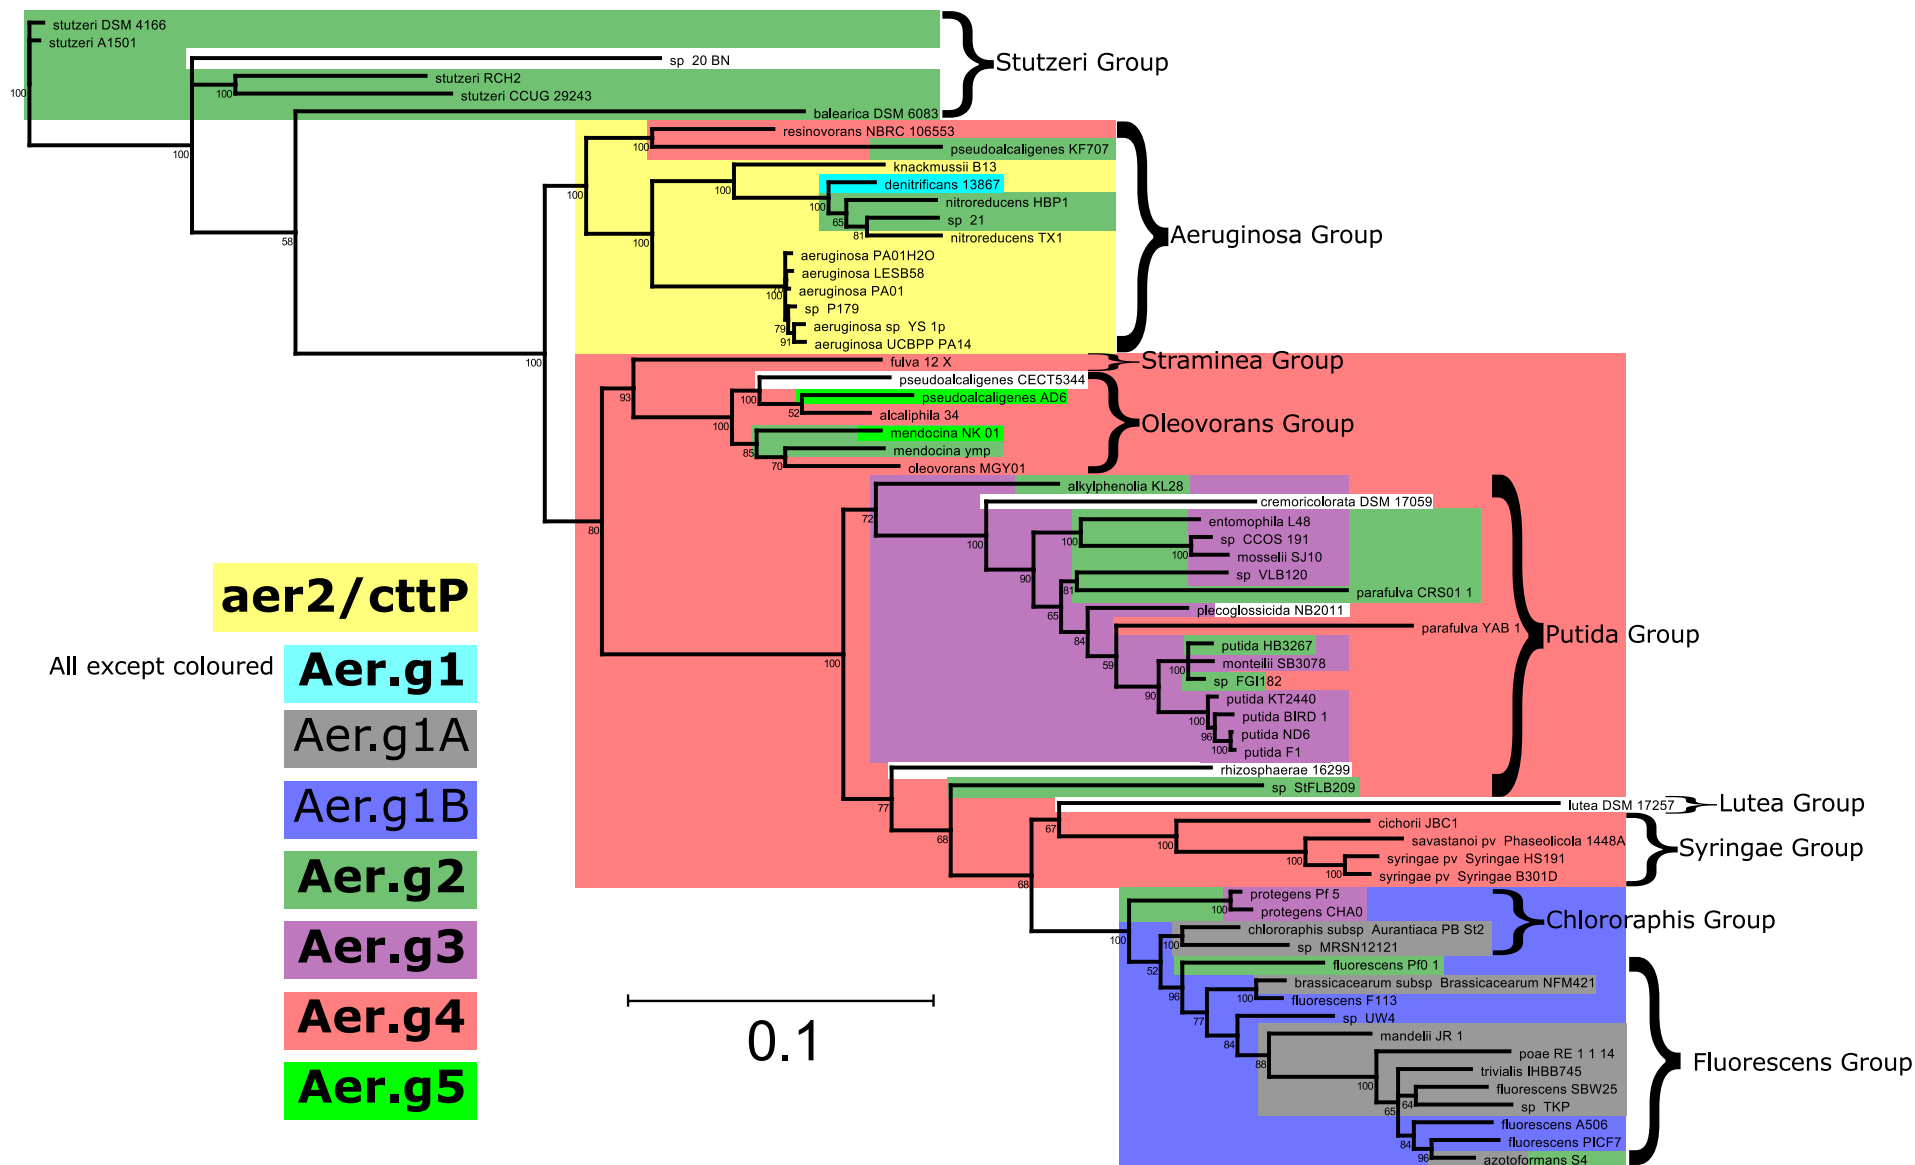

Figure 2: Unrooted maximum likelihood consensus tree showing phylogenetic relationship between *Pseudomonas* species based on concatenated *gyrB/rpoB/rpoD* nucleotide sequences. Colours indicate presence of *aer* homologs from each group as well as *aer-2/cttP*. Split colours and overlays indicate the presence of multiple homologs. All species have *Aer.g1*, except *P. denitrificans* 13867 (cyan). Numbers along branches indicate bootstrap support values from 100 replicates. Scale bar indicates average number of nucleotide changes per position.

## 175 Relationship between *Pseudomonas* and Aer Phylogenies

176 To get a better picture of how the phylogenetic relationships of Aer were influenced by  
177 the intragenus phylogeny of *Pseudomonas*, a species phylogeny was generated (Figure 2). This  
178 phylogeny was generated using concatenated alignments of *gyrB*, *rpoB*, and *rpoD* and matched  
179 well with previously published *Pseudomonas* phylogenies (17, 23). Species clades were named  
180 based on Gomila *et al.* (17) except for the *fluorescens* group as the present study did not include  
181 the large number of species necessary to sub-divide this group. Examination of how the various  
182 Aer subgroups, as well as Aer-2/CttP, mapped onto the genus phylogeny revealed their likely  
183 evolutionary trajectories (Figure 2). The presence of *aer.g1* in all species, except *P. denitrificans*  
184 indicates that it is a basal *Pseudomonas* gene. Both subdivisions of Aer.g1 occurred only in the  
185 more derived *P. fluorescens* subgroup. Conversely, *aer.g2* is distributed throughout the genus  
186 with no clear pattern. It is present in the more ancestral *P. stutzeri* group as well as the more  
187 derived *P. fluorescens* subgroup but is not present in many species in between. *aer.g3* is present,  
188 except for *P. protegens*, exclusively in the *P. putida* group, though not all members of the clade  
189 have it. *aer.g4* is present mostly in the related *P. straminea*, *P. oleovorans*, *P. putida*, *P. lutea*  
190 and *P. syringae* subgroups. Notably, it is not present in the *P. chlororaphis* or *P. fluorescens*  
191 subgroups, despite these being more derived than the aforementioned groups. *aer.g4* was also  
192 found in *P. resinovorans* and *P. pseudoalcaligenes* KF707, but not the rest of their *P. aeruginosa*  
193 subgroup. *aer.g5* is only present in two species, both in the *P. oleovorans* subgroup. *aer-2* and  
194 *cttP*, which were always found together, were exclusively present in the *P. aeruginosa* subgroup.

## 195 Genetic Features of *aer* Homologs

196 The grouping of Aer into 5 subgroups based on protein sequence information was  
197 confirmed and expanded on by examining features of the underlying *aer* genes. The upstream

198 and downstream regions of the *aer* genes were inspected to determine whether the genomic  
199 context was consistent across species (Figure 3). Additionally, the first two upstream and  
200 downstream genes of each *aer* gene were identified (Supplementary Table 1). The frequency of  
201 each of the associated genes and the general genomic context for each Aer homolog were thus  
202 examined to identify the most commonly associated genes (summarized in Figure 3). Each  
203 homolog was part of an apparently unique gene cluster: Aer.g1 with an aconitate hydratase (in  
204 69% of species) and a CAAX aminoprotease (33%), Aer.g2 with a PAS-containing diguanylate  
205 cyclase/phosphodiesterase (88%), Aer.g3 with a different PAS-containing diguanylate  
206 cyclase/phosphodiesterase (88%) and Aer.g4 with a LysR-type transcriptional regulator (64%)  
207 and a DTW-domain containing protein (74%). Beyond these, the second upstream and  
208 downstream genes tended to vary more widely, though some upstream genes were clearly  
209 conserved: Aer.g1, 23S rRNA methyl transferase (42%); Aer.g3, C4 dicarboxylate transporter  
210 (63%); Aer.g4, agmatinase (56%).

### 211 Evidence for Horizontal Transfer of *aer* Homologs

212 While examining the genomic contexts of *aer* homologs, indicators of mobile genetic  
213 elements were found nearby in many cases (Supplementary Table 2). Along with the varied  
214 distribution of Aer homologs within the *Pseudomonas* genus, and the findings from the genus  
215 phylogeny that distantly related species had similar complements of *aer* genes, this implied that  
216 they may have been subject to horizontal transfer. This possibility was further examined by  
217 generating tanglegrams comparing each of the *aer* subgroup phylogenies to corresponding genus  
218 phylogenies (Supplementary Figures 6-9). Initial inspection of the phylogenetic tree identified 3  
219 sequences that diverged from the expected species phylogeny. These 3 sequences  
220 (WP\_015271024.1, *P. putida* HB3267; WP\_014754514.1, *P. putida* ND6; and WP\_013791017.1,



## Genomic Context of Aer

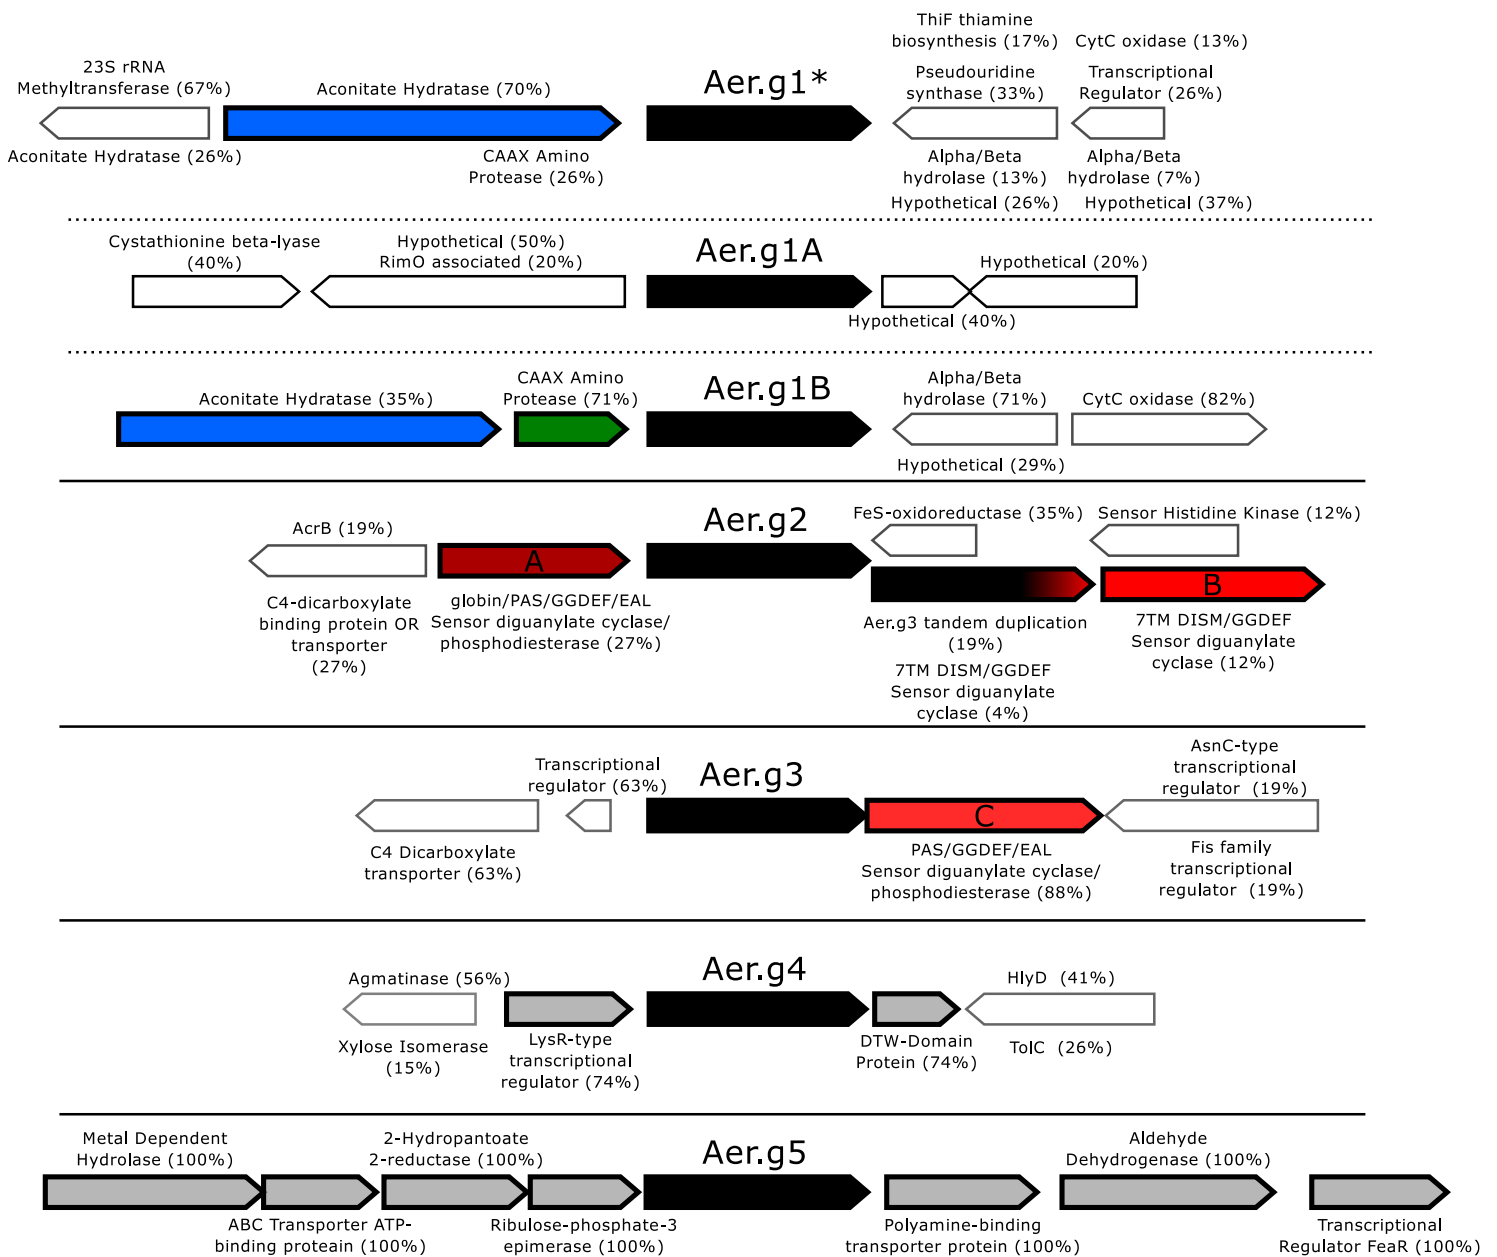

Figure 3: Frequency of occurrence and orientation of genes upstream and downstream from *aer* homologs from select *Pseudomonas* species. Genes with thick outlines are expected to be part of the same gene cluster based on their orientation and high frequency of occurrence with *aer*. Genes with noteworthy functions are coloured, and are discussed in the text, such as the 3 different diguanylate cyclases/phosphodiesterases (A, dark red; B, red; C, light red). Numbers beside gene functions indicate the frequency that they were found within each group or sub group. Gene lengths are approximate, *aer* is about 1.5kb long. *Aer.g1\** indicates *Aer.g1* sequences not including *Aer.g1A* and *Aer.g1B*.

221 *P. fulva* 12-X) were each found clustered with sequences from unrelated species whereas other  
222 Aer sequences were consistently clustered with sequences from closely related species. Of these  
223 3 genes only the *aer.g3* gene from *P. putida* ND6 was associated with mobile elements. Mobile  
224 elements were found within 5 Kbp of *aer* homolog genes (Supplementary Table 2). Inverted  
225 repeats were most common (20%), followed by transposases (4%) and integrases (1%). Aer.g5  
226 was never associated with mobile elements, Aer.g1 was associated least frequently, then Aer.g3,  
227 then Aer.g2 and Aer.g4 had the highest frequency of association with mobile elements. When  
228 mobile elements were found, they were often located immediately up and/or downstream of the  
229 *aer* homolog and its associated gene(s) described in the above section. Tanglegrams were used to  
230 identify instances where the *gyrB/rpoB/rpoD* based species phylogeny did not match with the  
231 *aer* subgroup phylogenies (Supplementary Figures 6-9). Three instances for Aer.g2 and one for  
232 Aer.g3 were identified where the *aer* gene had likely been transferred horizontally. Probable  
233 instances of horizontal transfer were also identified from mapping the *aer* subgroups onto the  
234 genus phylogeny (Figure 2). *P. resinovorans* and *P. pseudoalcaligenes* KF707 have Aer.g4  
235 despite being more distantly related to the other strains that possess this homolog. Also, both *P.*  
236 *protegens* strains have Aer.g3 despite being more distantly related to the *P. putida* subgroup  
237 strains that only have this homolog.

### 238 Amino Acid Sequence Comparison of Groups

239 As genomic analysis of the Aer subgroups confirmed the AA sequence-based groupings  
240 from the SHMR analysis, further sequence analysis was pursued to uncover sequence features  
241 that distinguished the various Aer groups. First, the domain architecture from all sequences were  
242 compared (Supplementary Figure 10). Domain assignments were obtained by submitting all  
243 sequences to SMART (24). All sequences were similar to the expected domain architecture of

244 Aer from *P. aeruginosa* PA01, consisting of a N-terminal Per/Arnt/Sim (PAS) domain,  
245 transmembrane helices and then the cytoplasmic kinase control (called MA for methyl-accepting  
246 in SMART) region which includes the CheW/CheA interface. Most Aer.g2 sequences also had a  
247 HAMP domain between the transmembrane region and MA domain, similar to Aer from *E. coli*  
248 (25). To further identify regions of the protein that are specific to the subgroups, results from the  
249 SHMR analysis for each inter-group comparison were plotted against the entire length of the Aer  
250 protein (Figure 4) and compared to the overall conservation at each AA position (Supplementary  
251 Figure 11). As expected, the CheW interface region of the MCP-signal domain and the PAS  
252 ligand binding domain were the most conserved regions, and also did not differ between groups,  
253 though the PAS domain was less conserved. Inspection of the SHMR scores for each intergroup  
254 comparison showed that the regions determining the specificity of each group were the same for  
255 each Aer group (Figure 4), except for Aer.g2 which had a group-specific region immediately N-  
256 terminal to the PAS domain. Sequences from this group also had variable length C-terminal  
257 extensions. The most notable group-specific region was in between the transmembrane helices  
258 and the beginning of the kinase control (MA) domain. As this is the location of the HAMP  
259 domain in *E. coli* Aer, this region was examined more closely.

#### 260 Group-Specific Domain Differences

261 First, the CheW/CheA interface region was examined more closely as its subdomains  
262 have been clearly defined (26). In bacterial chemoreceptors this domain consists of pairs of  
263 heptads, separated into three subdomains. Central to the domain is a glutamate residue which  
264 denotes the ‘zero’ position from which paired heptads are counted outwards until the C-terminus  
265 on one side and the end of the domain on the other. As there were 20 heptads to the C-terminus  
266 in all sequences, except Aer.g2 which had variable length extensions, all Aer from *Pseudomonas*

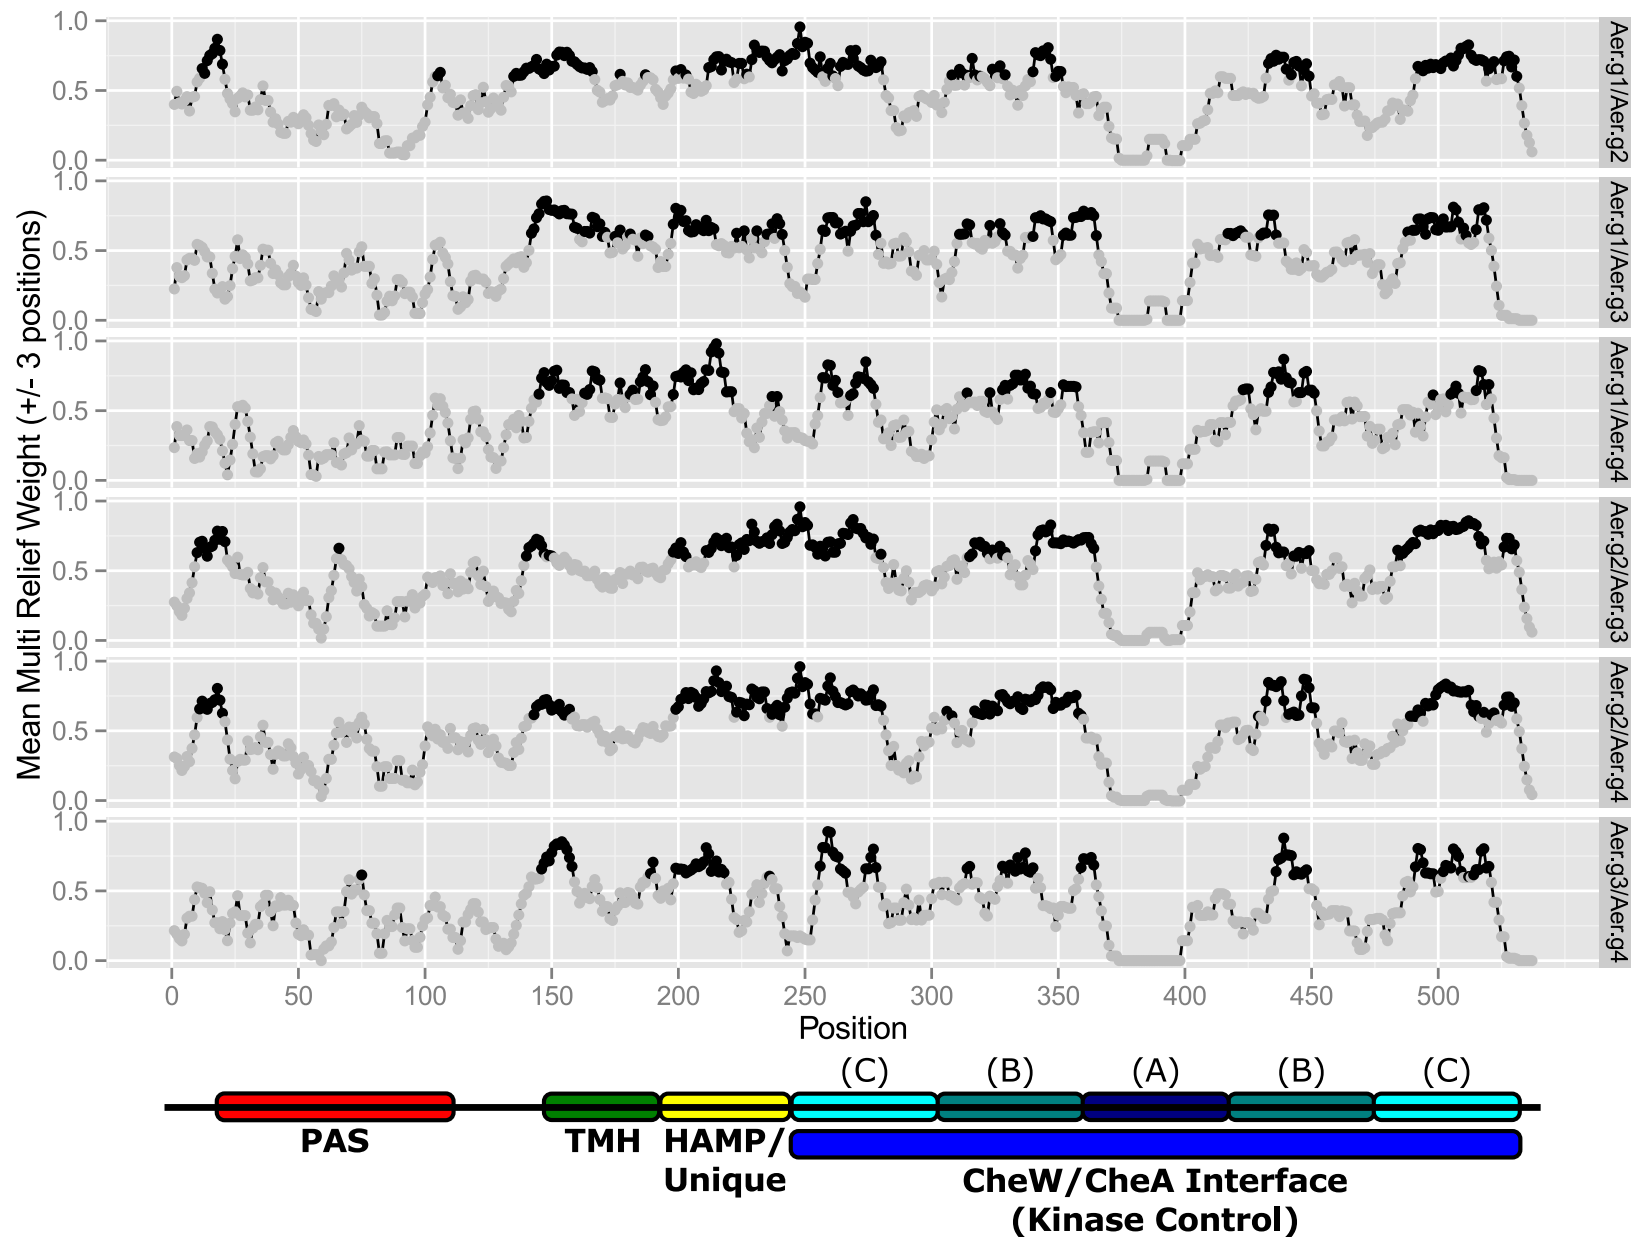

Figure 4: *Pseudomonas* Aer domain architecture and multi-relief scores showing group specificity of amino acid positions across the entire length of Aer for all intergroup comparisons. Black points indicate positions with a score above 0.6, grey below. This cutoff indicates positions that are conserved within groups but divergent between. Domains are PAS (Pern/Art/Sin) ligand binding (red), TMH (transmembrane helices, green), HAMP/Unique (in Aer.g2 HAMP, unique domains in other groups, yellow), CheW/CheA Interface also called Kinase Control (subdivided into A, signaling, dark blue; B, flexible bundle, teal; C, methylation, cyan).

267 fall in the 40H class (26). The three sub-domains (from the center outwards), signaling, flexible  
268 bundle, and methylation were marked and used to compare the conservation (Supplementary  
269 Figure 12) and group-specificity (Supplementary Figure 13) of the various Aer groups.  
270 Conservation showed that corresponding heptads of the more central methylation subdomain  
271 were better conserved than the flexible bundle subdomain. This corresponded with indications of  
272 group-specific features in the flexible bundle subdomain and in the outer heptads (furthest from  
273 the signaling subdomain) of the methylation subdomain.

274         The PAS and HAMP domains were also compared between all groups. The PAS domains  
275 from all Aer groups were not notably different and all had the expected features of a PAS  
276 domain (Supplementary Figure 14). Conversely, the cytoplasmic region between the  
277 transmembrane helices and kinase control domain, which contains a HAMP domain in *E. coli*  
278 Aer, had unique features in each Aer group (Figure 5). Only Aer.g2 had characteristic AAs of a  
279 HAMP domain, though all groups could be anchored by a conserved aspartate and glycine  
280 (which differed in absolute position between groups). The only other notable conservation was  
281 the final seven AAs of the domain, which were only conserved between Aer.g1, Aer.g3 and  
282 Aer.g4. In this heptad with the motif SZEARL(K/Q), only the Z was present in Aer.g2. With  
283 regards to the subdivision of Aer.g1, both the PAS and HAMP/‘unique’ domains supported  
284 keeping all sequences as a single group (Supplementary Figures 14 and 15). Aer.g2 also differed  
285 from the other three groups at its C-terminus as the final heptad of the kinase control domain  
286 differed and its members feature an up to 9 AA extension (Supplementary Figure 16).

287

288

289

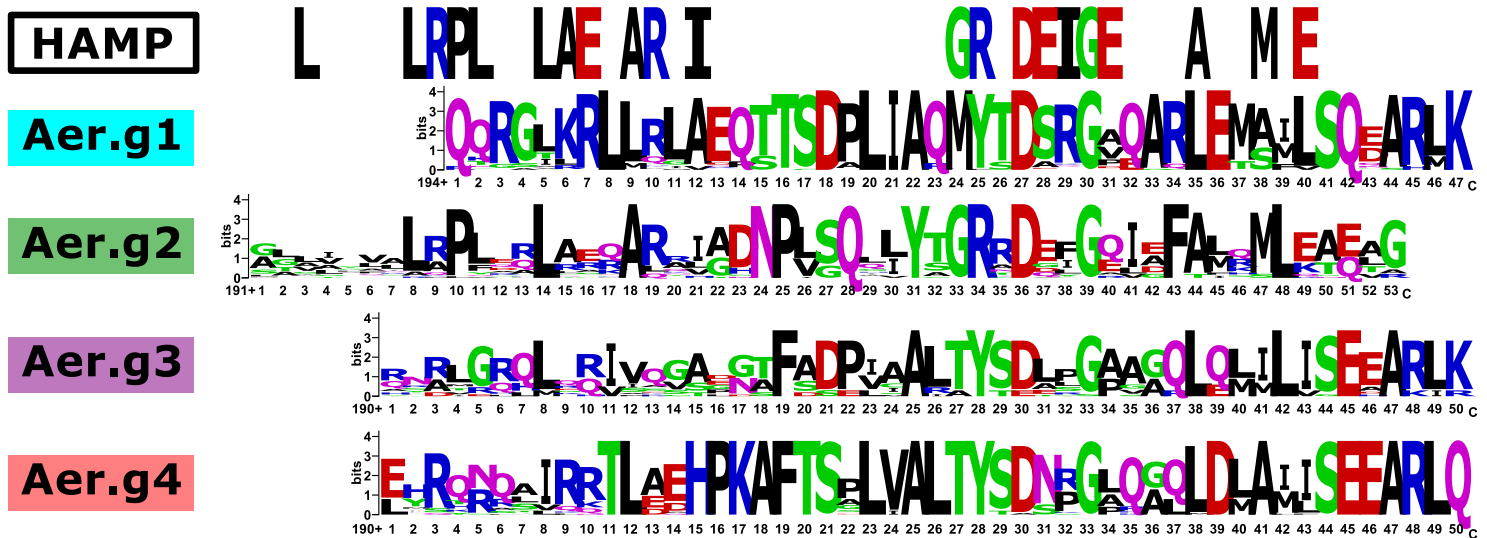

Figure 5: Weblogos of Aer group specific region in between end of transmembrane domain and start of cytoplasmic domain heptads. Start of cytoplasmic domain was based on the number of matching heptads on either side of the central glutamate residue (Aer.g1, 388; Aer.g2, 394; Aer.g3, 394; Aer.g4, 391). The end of the transmembrane domain was determined by submitting the consensus sequence of each group to THMMR. Weblogos were aligned based on the shared aspartate residue (Aer.g1, 221; Aer.g2, 227; Aer.g3, 220; Aer.g4, 220). Characteristic HAMP domain residues were obtained from the SMART database.

## 290 **Phenotypic Results**

291 To investigate the functions of Aer homologs, CttP and Aer-2, and to see whether they  
292 were linked, deletion mutants were constructed in the one species of *Pseudomonas* that  
293 possessed three Aer homologs, Aer-2 and CttP: *P. pseudoalcaligenes* KF707. Single and  
294 combination deletions were constructed using 2-step homologous recombination, the suicide  
295 vector pG19II and SacB sucrose counter-selection (27). To test energy-taxis, “soft agar swarm  
296 plates” were used (28). As swarming motility is NOT being tested in this assay, we called them  
297 “energy-taxis swim plates” instead of the term “soft agar swarm plates” in previous studies  
298 which is misleading. In this assay, a small amount of cells were inoculated into a plate by  
299 stabbing a needle covered in liquid culture into an agar plate containing a low (0.3%) percentage  
300 of agar and a high amount of carbon source (50mM) in minimal salts. As the initial inoculum  
301 divides and consumes the carbon source at the point of inoculation, daughter cells will swim  
302 outwards, producing a ring as energy-tactic cells seek out a better place to grow. Non-  
303 chemotactic strains will not be able to extend beyond the point of inoculation but non-energy  
304 tactic cells will produce a smaller ring than the wild-type (Supplementary Figures 17 and 18). To  
305 ensure that energy-taxis was being compared between the different mutants, the results were  
306 compared to a non-chemotactic CheA::KmR insertional inactivation mutant (29), and the  
307 chemotactic ability of all strains was also confirmed in classical chemotaxis swim plates  
308 (Supplementary Figure 19). Comparison of these metabolism independent results to the  
309 metabolism dependent results of the energy-taxis swim plates allowed for differences in energy-  
310 taxis capabilities to be observed between strains. All 24 mutants generated in this study, along  
311 with the wild-type and CheA control were tested in triplicate in media containing pyruvate  
312 (Figure 6) or succinate (Supplementary Figure 20). Ring diameters were measured from the

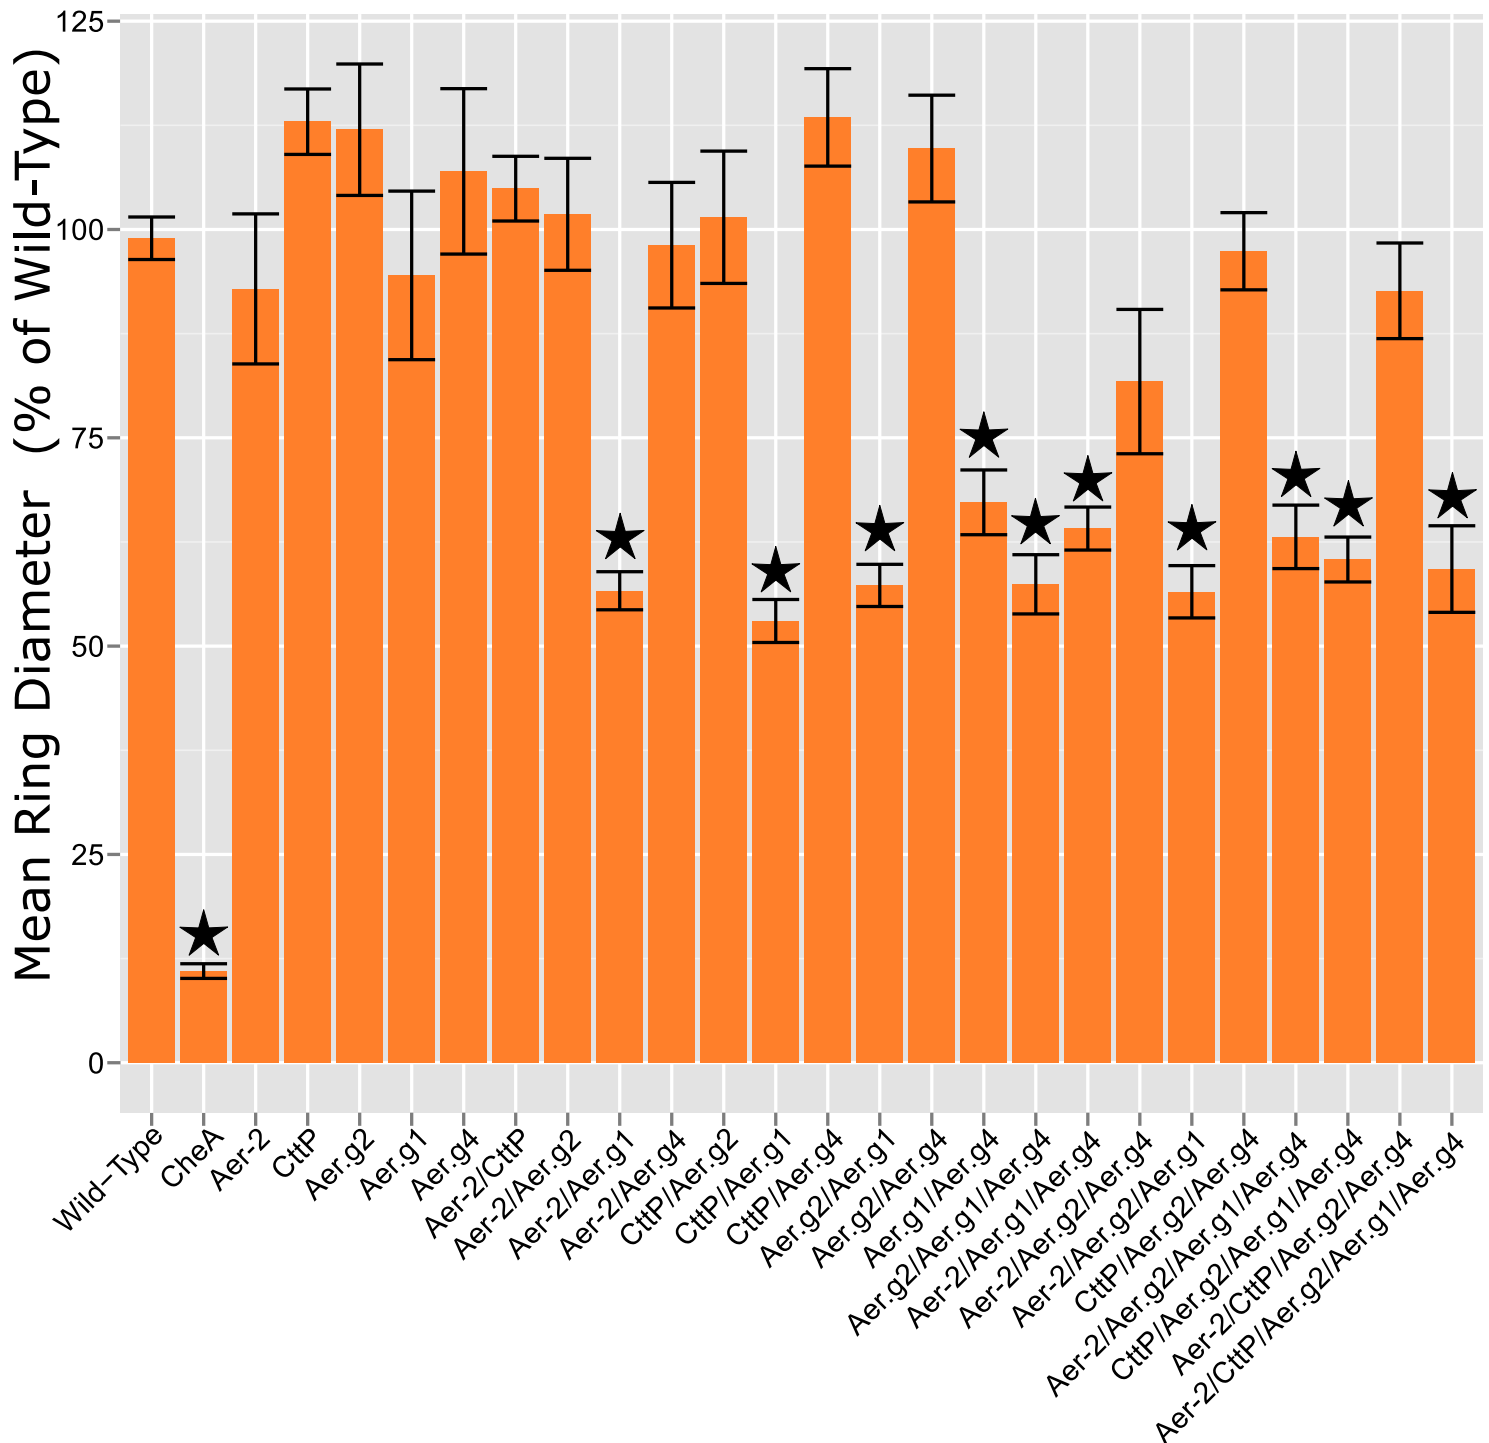

Figure 6: Normalized energy-taxis growth diameters in 50mM pyruvate of strains of *P. pseudoalcaligenes* KF707 with deletions of *aer2*, *c ttP* and *aer* homologs. Bars indicate the average growth diameter, normalized to the wild-type, at both 24h and 48h from at least 3 experimental replicates. Wild-type strains were normalized to the mean of technical replicates within each experiment. Error bars indicate standard error. Stars indicate significant differences from the wild-type based on Tukey's Honest Significant Differences test with a confidence value of 0.95.



313 furthest point reached from the inoculation centre (Supplementary Figure 18), normalized to the  
314 wild-type, then tested for differences using Tukey's Honest Significant Differences test  
315 (Supplementary Table 3).

316 The diameter of the chemotactic negative CheA mutant was about 10% of the wild-type,  
317 whereas energy-taxis negative mutants with diameters about 60% smaller were significantly  
318 different from the wild-type (Figure 6). All the singular deletions of Aer.g1, Aer.g2, Aer.g4, Aer-  
319 2 and CttP had no effect on energy-taxis; only strains that had Aer.g1 deleted in combination  
320 with at least one other receptor showed changes in their energy-taxis phenotype. Conversely,  
321 deletion of any combination of these receptors, including the quadruple Aer-  
322 2/CttP/Aer.g2/Aer.g4 mutant did not adversely affect energy-taxis. The Aer-2/Aer.g2/Aer.g4  
323 triple mutant had a diminished diameter, about 80% of the wild-type, but this was not significant.  
324 Results from plates containing succinate (Supplementary Figure 20) were similar to those  
325 obtained using pyruvate, but were more variable. The observed differences in swim diameters  
326 were not due to differences in growth rate as the rate of growth of the swim diameters was  
327 similar between all strains (Supplementary Figure 21, Supplementary Table 4) as well as their  
328 growth in liquid media (Supplementary Figure 22). All strains were also tested for chemotaxis  
329 towards pyruvate, glucose (Supplementary Figure 19) and succinate (data not shown) using  
330 traditional swim plate assays, and all strains except the CheA::KmR mutant were able to swim  
331 towards pyruvate, succinate and glucose. As Aer.g1 played a pivotal role in energy-taxis the  
332 wild-type and quintuple Aer-2/CttP/Aer.g1/Aer.g3/Aer.g4 mutant were complemented with  
333 Aer.g1 on a plasmid which showed the expected increase and recovery, respectively, of energy-  
334 taxis in succinate plates (Supplementary Figure 23, Supplementary Table 5). Together these

335 experiments showed that it was only the combined deletion of Aer.g1 with any of the other tested  
336 receptors that caused a reduction of energy-taxis.

337

## 338 **Discussion**

339 In *Pseudomonas* the chemoreceptor Aer has been characterized as a receptor for energy-  
340 taxis. *P. aeruginosa* has a single Aer chemoreceptor whereas *P. putida* has three homologs. Here  
341 we used a bioinformatics analysis of Aer protein sequences from throughout the *Pseudomonas*  
342 genus to determine the relationship between Aer homologs, their specific features, and generate a  
343 phylogenetically-based naming for these homologs to alleviate the problematic name given to  
344 ‘Aer2’. Additionally, in *P. pseudoalcaligenes* KF707, the one species that possessed three Aer  
345 homologs, Aer-2 and the ostensible tetrachloroethylene receptor CttP, deletional mutagenesis  
346 was used to demonstrate that the Aer.g1 was key but not essential for energy-taxis.

### 347 Protein sequence and genetics classify Aer homologs into 5 groups

348 Aer has previously been described in *P. putida* and *P. aeruginosa* (8, 30–32), though the  
349 two species differed in the number of apparent homologs indicating there is interspecies  
350 variation. Here we constructed a protein sequence based phylogeny which separated Aer into 5  
351 different subgroups. All groups varied in the same regions of the protein, except Aer.g2 which  
352 had a unique region at the C terminus, which does not resemble the C-terminal cheR interface  
353 pentapeptide of Aer-2 (33). The most conserved regions included the PAS ligand binding domain  
354 and CheW/CheA interface region which confer the necessary functions of FAD cofactor  
355 binding/signal reception (34) and signal transduction, respectively. The conserved regions in the  
356 signaling region were better conserved than the predicted PAS domain, though these domains are  
357 known to differ at the sequence level (34). As the PAS domains were conserved, this suggests

358 that all Aer subgroup members respond to the same signal. In all groups, the N-terminal heptad  
359 13 methylation sites (35) were also conserved, implying that Aer is modulated via methylation  
360 similarly to other chemoreceptors. Interestingly, it was the cytoplasmic region between the  
361 transmembrane helices and kinase control domain that was unique to each subgroup (Figure 5).  
362 Aer.g2 had a HAMP domain in this location, as in *E. coli* Aer (36). In this organism, interactions  
363 between the PAS and HAMP domains are essential for the function of the protein as the HAMP  
364 domain transfers the signal through the protein (25). Aer.g2 likely functions in the same way but  
365 the other four Aer groups do not have this HAMP domain, suggesting that they function  
366 differently. While there were a few positions conserved between the groups, such as the aspartate  
367 used to anchor this portion of the alignment (Figure 5), the most important defining residues (37)  
368 were only present in Aer.g2. HAMP domains are also expected to be found here in the majority  
369 of MCPs (2) so this indicates that most Aer homologs in *Pseudomonas* differ substantially from  
370 other MCPs.

371 Protein sequence based group assignments were supported by the genomic context of the  
372 corresponding genes; there tended to be the same genes in the immediate vicinity of the *aer*  
373 genes from each group, though this also supported the existence of additional groups. The two  
374 branches of Aer.g1 which were initially classified as their own groups (Figure 1) did not have the  
375 same up and downstream genes as the rest of Aer.g1, however including these sequences within  
376 Aer.g1 was supported by the SHMR analysis. These sequences represent the only duplications of  
377 Aer.g1 and only occurred in species which had no other Aer homologs (except *P. azotoformans*  
378 S4). As the protein sequences do not differ as much as the other groups, and the genomic context  
379 within this group differed, this may represent a recent duplication event within these lineages.

380 Phenotypic characterization of the two Aer receptors in these species could be particularly  
381 enlightening to understanding why only some *Pseudomonas* species have extra *aer* genes.

382 Aer.g1 is the most prevalent homolog

383 Aer from *E. coli* has been well-studied, so Aer from *E. coli* K12 was used as an outgroup  
384 for the *Pseudomonas* Aer phylogeny, even though *E. coli* is not closely related to *Pseudomonas*  
385 (38). *E. coli* Aer was distantly related to all *Pseudomonas* Aer sequences and it was positioned  
386 between Aer.g1 and Aer.g2 on the phylogenetic tree (Supplementary Figure 1). As such, which  
387 of these groups was ancestral could not be determined from the protein sequence phylogeny  
388 alone. Aer.g1 was the most prevalent as all the *Pseudomonas* species included in this study had  
389 at least one homolog except *P. denitrificans* ATCC13867. As this species did not have any Aer  
390 homologs, this means that Aer is not part of the *Pseudomonas* core genome, though it is likely  
391 ancestral and was lost in *P. denitrificans*. Unlike Aer.g1, Aer.g2 was not present in all  
392 *Pseudomonas* species, but it was present in species from most subgroups. Together with the *E.*  
393 *coli* rooted phylogeny this suggests that both Aer.g1 and Aer.g2 were present in the last common  
394 ancestor of all *Pseudomonads* but only Aer.g2 was present in the last common ancestor of *E. coli*  
395 and *Pseudomonas*. This would imply that Aer.g2 is basal to the gamma proteobacteria. Indeed,  
396 preliminary investigations suggest homologs are present in diverse lineages such as  
397 *Marinobacter*, *Shewanella*, *Ralstonia*, and *Vibrio*.

398 Almost all *aer.g1* genes were adjacent to an aconitase gene (Figure 3), indicating that  
399 they may be co-regulated or co-transcribed. In *Helicobacter pylori*, TlpD, which controls tactic  
400 behaviour in low-energy conditions, has been found to interact with aconitase (39), possibly  
401 indicating some common connection between aconitase and energy-taxis receptors. A gene  
402 encoding a predicted CAAX amino protease was found adjacent to one third of Aer.g1 homologs.

403 This type of membrane-bound protease aids in prenylating proteins to ease their membrane  
404 localization (40). The Aer.g1 proteins whose genes were located beside these predicted proteases  
405 did not have the expected CAAX motif and there were no obvious features at the sequence level  
406 that distinguished these sequences from other Aer homologs indicating that the genomically co-  
407 localized CAAX protease may not be involved in their functioning.

#### 408 Other Aer groups may have unique functions

409 As the 5 previously characterized Aer receptors are Aer.g1 homologs with the same  
410 energy-taxis function, it is possible that the other homolog groups may have a related, but  
411 different or more specific function. The three Aer homologs of *P. putida* KT2440 were found to  
412 be differentially expressed (9), supporting this hypothesis. In *E. coli* Aer is also a thermosensor  
413 (41) indicating another possible role, or they could aid in tuning the energy-taxis response  
414 similarly to how Tsr and Tar from *E. coli* enable taxis towards the ideal pH from both higher and  
415 lower initial pHs (42). The function of the additional Aer homologs could also be related to  
416 biofilm formation as Aer.g2 and Aer.g3 were each associated with their own PAS-domain  
417 containing diguanylate cyclase/phosphodiesterase. Though Aer is expected to only act as a Che1  
418 chemosensor (35), the recent revelation that not all chemosensors mediate chemotaxis (43), and  
419 are instead involved in so-called ‘alternative cellular functions’ such as cyclic di-GMP signaling,  
420 makes this frequent association of phosphodiesterase/diguanylate cyclases with Aer.g2 and  
421 Aer.g3 noteworthy. Deletion of the diguanylate cyclase/phosphodiesterase associated with  
422 Aer.g3 in *P. putida* KT2440 caused a general defect in motility (9) and was later shown to be a  
423 bi-functional cyclic di-GMP phosphodiesterase and diguanylate cyclase (44). These two  
424 homolog groups may thus be involved in energy-sensing behaviour in biofilms as c-di-GMP is  
425 an important regulator in the transition from planktonic to sessile growth modes. In *P.*

426 *aeruginosa*, increased levels of cyclic di-GMP decreases the frequency of flagellar motor  
427 switching through MapZ as it inhibits CheR1 from methylating some MCPs (45). As this shows  
428 a direct connection between chemotaxis and cyclic di-GMP, understanding the function of the  
429 Aer homolog-associated cyclase/phosphodiesterases will be of interest.

#### 430 Possibility of horizontal transfer of *aer* homologs

431 Chemoreceptors have been posited to be subject to horizontal gene transfer (46), but to  
432 our knowledge this has only been demonstrated in plasmids of *E. coli/Shigella* (47). Here we  
433 presented multiple lines of evidence that suggest genes from the *aer* group have been  
434 horizontally transferred in the chromosome of *Pseudomonas* species. In the Aer phylogeny, three  
435 homologs from *P. putida* HB3267, ND6 and *P. fulva* 12-X each clustered beside Aer sequences  
436 from unrelated species indicating they may have been obtained from those species.  
437 Incongruencies between the Aer phylogeny and genus phylogeny were also found using  
438 tanglegrams. These figures highlight other instances where *aer* homolog sequences were more  
439 closely related than the species hosting these genes, which could indicate non-vertical  
440 inheritance. Additionally, we noted several cases where strains of the same species differed in  
441 which Aer homologs they possessed. For example, of the three *P. pseudoalcaligenes* strains  
442 examined here, each one had a drastically different complement of genes (CECT5344, *aer.g1*;  
443 AD6, *aer.g1/aer.g4/aer.g5*; KF707, *aer.g1/aer.g2/aer.g4/aer-2/cttP*).

444 The observed variation in the distribution of Aer homologs is unsurprising as even within  
445 the *P. aeruginosa* pan-genome from 7 strains there are 2,000 accessory genes compared to 5,000  
446 core genes (48). The fact that *aer.g1* almost qualifies as part of the genus core genome (*P.*  
447 *dentrificans* being the only outlier) indicates that is a very useful gene in the varied environments  
448 inhabited by *Pseudomonas*. The existence of the various homologs speaks to their utility as they

449 each may confer a more specific function. As many *Pseudomonas* species live in the soil and  
450 rhizosphere, which promotes horizontal gene transfer (49), there would be ample opportunity for  
451 these *aer* homolog genes to spread. Interestingly they appear to be restricted to *Pseudomonas* as  
452 reverse BLAST searches consistently returned *Pseudomonas* sequences as the closest hits.

#### 453 Genes influencing energy-taxis in *P. pseudoalcaligenes* KF707

454 *P. pseudoalcaligenes* KF707 was the only species that had three Aer homologs as well as  
455 Aer-2 and CttP. We have previously examined its chemotactic ability towards biphenyl (50), and  
456 how its multiple *cheA* genes affect biofilm formation (29) and swimming motility (51). Aer  
457 from *P. aeruginosa* PA01 (8), *P. putida* F1 (11) and *P. putida* KT2440 (9) have been previously  
458 characterized but are all part of the Aer.g1 homolog group. The functional Aer homolog from *P.*  
459 *putida* PRS2000 (10) was not included here as this species' genome has not been fully sequenced,  
460 though based on its sequence it is also an Aer.g1 homolog. The receptors from *P. putida* F1 and  
461 KT2440 were both named 'Aer2' but the phylogeny presented here indicates they belong to the  
462 Aer.g1 homolog group and so should be renamed to remove the '2'. In the present study, all  
463 three *aer* homologs in *P. pseudoalcaligenes* KF707, representing *aer.g1*, *aer.g2* and *aer.g4*, as  
464 well as *aer-2* and *cttP* were deleted individually and in combination. The energy-taxis  
465 phenotypes of these mutants were compared based on their diameters in soft agar energy taxis  
466 plates. As the growth rate of all the strains in these plates, and in liquid culture did not differ, as  
467 well as their chemotactic ability in swim plates, the observed differences were taken as  
468 indication that the perturbed genes influenced energy-taxis in some way.

469 No single deletions affected the energy-tactic ability of *P. pseudoalcaligenes* KF707.  
470 This differs from *P. putida* KT2440 which became energy-taxis negative when only its Aer.g1  
471 homolog was inactivated (31). Both species have Aer.g4, but KF707 has Aer.g2 and KT2440

472 Aer.g3. In KF707, co-deletion of either *aer.g4* or *aer.g2* with *aer.g1* caused a reduction of  
473 energy-taxis, but deletion of *aer.g2* and *aer.g4* together had no effect. The three Aer homologs in  
474 KT2440 are differentially expressed and thus were not truly redundant (31), but in KF707 its Aer  
475 homologs appear to be at least partially redundant. In *Ralstonia solanacearum* both of its “Aer1”  
476 and “Aer2” receptors were necessary for aerotaxis and restored energy-taxis in a deficient *E. coli*  
477 mutant (52). As these receptors appear to be homologous to Aer from *Pseudomonas* and *E. coli*,  
478 it was likely energy-taxis enabling the swimming of *R. solanacearum* towards oxygen.  
479 Interestingly these two receptors appear not to be redundant as inactivation of either one caused a  
480 defect. In *Vibrio cholerae*, the number of Aer homologs also differs between species. The El tor  
481 biotype has three, compared to two in strain O395N1 (53). The additional Aer (called Aer-1) in  
482 the El tor biotype is most similar to Aer.g2, though all the sequences from *Vibrio* and *Ralstonia*  
483 appear to be quite different (identity below 50% on <90% coverage) than *Pseudomonas*  
484 sequences making it difficult to categorize these homologs according to the naming scheme  
485 developed here for *Pseudomonas*. Only one homolog in *V. cholera* was found to affect energy-  
486 taxis, leaving the exact function of the other homologs unknown, similar to *Pseudomonas*. Of  
487 these five receptors from species other than *Pseudomonas* only one has an obvious HAMP  
488 domain, implying that the HAMP domain in *E. coli* Aer is less common than other forms of Aer  
489 in gamma proteobacteria.

490 Aer and Aer-2 were first characterized as aerotaxis receptors in *P. aeruginosa* PA01 (8).  
491 In *P. putida* KT2440, which does not have Aer-2, its Aer.g1 homolog was found to mediate taxis  
492 towards oxygen (9). Aer-2 has been shown to bind oxygen (12), and its overexpression in *P.*  
493 *aeruginosa* and *E. coli* abolished chemotaxis (54) but its function as an aerotaxis receptor  
494 remains inconclusive. Here we showed that single deletion of *aer-2* did not affect energy-taxis,



495 but co-deletion with *aer.g1* resulted in a similar reduction in energy-taxis as co-deletion with  
496 either of the other *aer* homologs. The Aer-2 protein has a C-terminal extension that specifically  
497 allows CheR2, and only CheR2, to methylate it (33), and is required for the complexation of  
498 other Che2 proteins (13), making it appear that the entire Che2 pathway exists to transduce the  
499 signal sensed by Aer-2. This was recently confirmed using sequence analysis of all *P.*  
500 *aeruginosa* PAO1 chemoreceptors (35). Our results were thus surprising as no connection was  
501 expected between Aer-2 and the *che1* system, which transduces the signal of Aer, though the  
502 functions of Aer and Aer-2 in aerotaxis were linked in their initial characterization (8). As their  
503 phenotypic outputs may overlap, *P. denitrificans* may be an ideal organism to study Aer-2, as it  
504 has no Aer homologs.

505 The *che2* gene cluster is preceded by *cttP* so we investigated the possibility of its  
506 involvement in energy-taxis as well. In *P. aeruginosa* PAO1, CttP was characterized as a receptor  
507 for positive chemotaxis towards tetra/tri-chloroethylene (PCE/TCE) (14). As this organism does  
508 not perform reductive dehalogenation, intentional taxis towards these compounds is puzzling. In  
509 *E. coli*, the receptors Tar and Tsr can mediate attractant and repellent responses to phenol  
510 through its direct interaction with the transmembrane helices or cytoplasmic HAMP signaling  
511 domains (15). We thus hypothesized that a similar interaction may have mediated the observed  
512 PCE/TCE chemotaxis and that CttP actually has a different function. CttP is only found in  
513 organisms with Aer-2, and the gene is located immediately upstream of the *che2* gene cluster.  
514 Here we showed that co-deletion of *cttP* and *aer.g1* in *P. pseudoalcaligenes* KF707 reduced  
515 energy-taxis comparable to co-deletion of *aer.g2* or *aer.g4*. CttP has an unusual domain  
516 architecture compared to other MCPs as it has no predicted ligand-binding domain and a single  
517 N-terminal predicted transmembrane domain (55). It does have the expected CheW/CheA

518 interface domain, but also a long (>100 AA) C-terminal extension not seen in most MCPs. It  
519 could be possible that CttP does not directly sense any signal, but interacts with MCP receptor  
520 complexes and/or influences their interaction with the Che complex. Overexpression of *cttP*  
521 abolished all chemotaxis in both *P. aeruginosa* and *E. coli* (54), possibly indicating that its  
522 function is in modulating signaling from the che1 system.

523         Despite being the first gene in the *che2* gene cluster, *cttP* is involved only with *che1*  
524 genes as the *che2* system is dedicated to processing the signal sensed by *aer-2* (35). It is thus  
525 puzzling that *cttP* was always found in species that have *aer-2*, and that deletion of *aer-2* in  
526 combination with *aer.g1* diminished energy-taxis in *P. pseudoalcaligenes* KF707. This could be  
527 due to cross-talk between the systems as the exact output of the *che2* system is not fully known,  
528 though it is known to affect chemotaxis. The observed phenotype could have also been due to  
529 overlapping phenotypic output between energy-taxis and aerotaxis as *aer-2* certainly binds  
530 oxygen but its cellular function is not conclusively known (56).

531

## 532 **Conclusions**

533         In *Pseudomonas*, Aer is not a single receptor for energy-taxis, but a family of receptors.  
534 The various homologs differ mostly in the region between the PAS ligand binding domain and  
535 methyl-accepting CheW/CheA interface domain, and most do not have a HAMP domain. The  
536 number of Aer homologs varies widely between species and they have likely been horizontally  
537 transferred. The most prevalent homolog in the *Pseudomonas* genus, here named Aer.g1,  
538 mediates energy-taxis in *P. aeruginosa* and *P. putida*, but in *P. pseudoalcaligenes* KF707 Aer.g2  
539 and Aer.g4, can also influence energy-taxis. Aer-2 and CttP also appear to have some effect.

540 These findings indicate that Aer and energy-taxis in *Pseudomonas* are more variable and  
541 complicated than the single receptor found in the archetypal species *P. aeruginosa*.

542

## 543 **Materials and Methods**

### 544 **Protein Sequences**

545 All sequences were obtained using NCBI databases and tools (57). BLAST searches on the  
546 NCBI website (18) (pBLAST for draft and completed genomes, tBLASTn for whole-genome  
547 shotgun genomes) were performed using *P. aeruginosa* PA01 Aer (NP\_0250252.1) as a query  
548 sequence. From each species, all hits with >95% sequence coverage, no matter how low the  
549 sequence identity, were selected for inclusion. BLAST did not return any results with coverage  
550 values between 67% and 95%, indicating that all included sequences were likely to truly be Aer  
551 sequences. Expect values were always below  $1 \times 10^{-100}$ . Four sequences were removed as they  
552 were redundant entries resulting from incorrect start site annotations resulting in two proteins  
553 with the same C-terminus but slightly different N-termini. Sequence accession numbers were  
554 thus obtained from the international nucleotide sequence database collaboration (INSDC) (58).  
555 NCBI Entrez was used to obtain FASTA formatted sequences which were then compiled into a  
556 single file.

### 557 **Amino Acid Alignment**

558 Full length sequences were aligned using COBALT (on the NCBI website) (19) as this  
559 algorithm works well when only part of the sequence is well conserved, as in MCPs. The default  
560 settings were used as adjustment did not improve the alignment noticeably. The generated  
561 alignment had numerous gaps, which were manually removed by adjusting the alignment in  
562 Jalview 2.10 (59). The alignment was then finalized by re-aligning using MUSCLE (as

563 implemented in Jalview, default settings) (60), resulting in a removal of gaps without  
564 misaligning the sequences. Names were cleaned up using a custom script in R to reduce the  
565 names to just the species, strain and accession number in a presentable fashion (61). An  
566 additional alignment including Aer from *Escherichia coli* was also generated in the same fashion.  
567 Both alignments were used as input to generate maximum likelihood phylogenies using PHYML  
568 (20), as implemented by the South of France Bioinformatics platform (21). PHYML options:  
569 Amino-Acids, 100 bootstrap replicates, JTT amino-acid substitution model, BEST tree topology  
570 search operation, tree topology, branch length and rate parameters were optimized. Consense  
571 was then used to generate a consensus tree from the bootstrap replicates using the majority rule  
572 (extended), and only treating the tree as rooted when the *E. coli* outgroup was included.

### 573 Sequence Harmony and Multi-Relief Analysis to Determine Groups

574 The multi-Harmony server was used to apply sequence harmony and multi-relief  
575 (SHMR) to validate groupings made based on the ML tree grouping and alignment. Groups were  
576 manually decided based on the tree topology and corresponding alignment, initially making for 7  
577 groups. These seven groups were compared in pair-wise fashion using SHMR (22). Thus for  
578 each pair of groups a score was calculated for each amino acid position that indicated how  
579 conserved it was within groups and how divergent it was between groups. A score of 1 indicates  
580 perfect conservation within and perfect divergence between groups. Empirical cumulative  
581 distribution functions (ECDF) were plotted for each comparison and the percent of AAs above  
582 the 0.8 cutoff recommended by the SHMR authors was determined. As most comparisons  
583 resulted in 25% of AAs reaching this threshold, the two pairs of groups that, when compared,  
584 only had 10% of AAs above the cutoff, were deemed incorrect group assignments. These groups  
585 were merged and the process repeated to produce 5 groups that all had ~25% of AAs above the

586 cutoff threshold. Group 5 was consistently excluded as it only contains 2 highly divergent  
587 sequences.

### 588 Comparison of Groups

589 Unique regions of each group of Aer homologs were identified by comparing the SHMR  
590 scores for each pair-wise comparison with the overall conservation score of each AA and the  
591 domain architecture of the Aer protein. Conservation scores were obtained from Jalview (59),  
592 and along with the SHMR scores were smoothed and plotted using ggplot2 (62) in R. Smoothing  
593 was performed by calculating the average of the 3 preceding and following AAs for each  
594 position. The domain architecture of Aer was obtained from the conserved domain database  
595 using Aer from *P. aeruginosa* as a query (NP\_250252.1) (CDD) (63). WebLogos were generated  
596 using the Weblogo generator tool (64).

### 597 Distribution of Groups

598 Based on the ML tree grouping, the number of times a strain appeared in each group was  
599 counted. This matrix was then transposed (now indicating the number of Aer homologs per  
600 group for each strain). A hierarchically clustered heatmap using Bray-Curtis distance and  
601 average clustering was made in R. Presence of Aer-2 (NP\_248866.1) and CttP  
602 (WP\_003106690.1) were determined using BLAST searches specifically against the strains.  
603 Pseudogenes were detected by BLASTing the nucleotide sequence of Aer.

### 604 Detection of Evidence of Horizontal Gene Transfer

605 Graphical representations of the Aer homologs nucleotide sequences were manually  
606 inspected on NCBI. The first two genes upstream and downstream of the *aer* homolog were  
607 noted, along with any mobile elements (transposase, integrase and inverted repeats) within 5kb.  
608 For each different upstream and downstream gene their frequency of occurrence was calculated

609 for each homolog group. The frequency of occurrence of each type of mobile element was also  
610 calculated, as well as for the complete set of homologs.

#### 611 Generation of DNA Sequence Phylogeny

612 Gene sequences were obtained by BLAST (18) using sequences of *gyrB*, *rpoB* and *rpoD*  
613 from *P. aeruginosa* PAO1. Sequences were aligned separately by MAFFT (65) and positions  
614 with gaps in any strain were removed. Sequences from all three genes were then concatenated  
615 and a ML phylogeny was generated using DIVEIN (66). DIVEIN parameters: substitution model,  
616 GTR; equilibrium frequencies, optimized; proportion of invariable sites and gamma distribution  
617 parameter, estimated; number of substitution rate categories, 4; tree searching, NNI+SPR; tree  
618 optimized for topology and branch lengths; 100 bootstrap replicates. Tanglegrams were  
619 generated in Dendroscope (67) by pruning branches from the genus DNA tree so that only strains  
620 that matched the particular Aer homolog group were included.

#### 621 Culture Growth

622 For molecular biology, cultures were routinely cultured in lysogeny broth (LB, 5 g/L  
623 yeast extract, 10 g/L Tryptone, 10 g/L NaCl). For energy-taxis experiments *P. pseudoalcaligenes*  
624 KF707 strains were grown overnight (16 h) in minimal salts media containing 10 mM pyruvate  
625 or succinate. Minimal salts media contained (in g/L) K<sub>2</sub>HPO<sub>4</sub>, 3; NaH<sub>2</sub>PO<sub>4</sub>, 1.15; NH<sub>4</sub>Cl, 1; KCl,  
626 0.15; MgSO<sub>4</sub>, 0.15; CaCl<sub>2</sub>, 0.01; FeSO<sub>4</sub>, 0.0025. The latter four were sterile filtered and added  
627 after autoclaving.

#### 628 Generation of Deletion Constructs and Mutants

629 Nucleotide sequences for Aer.g1, Aer.g2, Aer.g4, Aer2 and CttP were obtained from the  
630 draft genome sequence of *P. pseudoalcaligenes* KF707 (68). Primers for a ~500bp region up and  
631 downstream of each region were generated using Primer BLAST (69). Benchling was used to

632 alter the primers, adding BamHI or HindIII restriction sites to the outer primers and the reverse-  
633 complement of the other inner primer to each of the internal primers. Genomic DNA was  
634 isolated by the phenol/chloroform method (70). In separate PCR reactions the upstream and  
635 downstream fragments were amplified using Hi-Fidelity (HF) Enzyme mix (Fisher Scientific,  
636 USA). Fragments were purified by gel extraction using an EZDNA kit (Omega Bio-Tek, USA)  
637 then pooled and used as the template for the second PCR reaction using only the outer primers.  
638 The pG19II vector(71), purified using an EZDNA plasmid mini kit II (Omega Bio-Tek, USA),  
639 and insert were digested using BamHI and HindIII (Invitrogen, USA). Digestion products were  
640 purified then ligated together using T4 ligase (Invitrogen, USA. Ligations were transformed  
641 either directly into *E. coli* Top10F' or first into DH5 $\alpha$  chemical competent cells using standard  
642 methods (70). White colonies were picked from LB X-Gal gentamycin (20  $\mu$ g/mL) plates and  
643 their plasmids isolated and screened for a ~1kb bandshift. Those with the appropriate shift were  
644 sequenced (Eurofins, USA) to confirm the correct insert sequence. To delete the genes from the  
645 *P. pseudoalcaligenes* KF707 genome, the deletion construct containing plasmids were  
646 introduced by conjugation. Cultures of *E. coli* HB101 carrying the helper plasmid pRK2013 (72)  
647 and *E. coli* Top10F' carrying the deletion construct in pG19II were grown to early log-phase  
648 (OD ~0.3) along with the KF707 wild-type, or later, deletion mutants. Donor, helper and  
649 recipients were mixed and plated, grown overnight then the cell mass was collected and spread  
650 on AB glucose plates (5 g/L glucose, minimal salts media) containing 20  $\mu$ g/mL gentamycin for  
651 48h at 30°C. Transconjugant colonies were picked off the AB glucose Gm plates into LB no salt,  
652 LB 10% sucrose and LB + 20  $\mu$ g/mL Gm. Colonies that were able to grow with Gm but not (at  
653 all) with sucrose were selected for continued use. The LB no salt overnight culture was used to  
654 inoculate LB 10% sucrose. After 4h, the culture was plated on LB 10% sucrose and colonies

655 were screened to determine if the deletion occurred. Colony PCR was used to find those that had  
656 ONLY a band at ~1Kbp which were sent for sequencing (Eurofins, USA) to confirm the deletion.  
657 *P. pseudoalcaligenes* KF707 *cheA::Tn5* from Tremaroli *et al* 2011 (29) is called the ‘cheA’  
658 mutant throughout the text as its *cheA1* (equivalent to *P. aeruginosa* PA01) has been disrupted.

### 659 Energy-taxis Swim Plates

660 Swim plates were made by making minimal salts media with 0.3% agar and 50mM  
661 succinate or pyruvate. Strains were grown overnight in minimal salts media containing 10mM of  
662 the appropriate carbon source. An inoculation needle was sterilized by ethanol and flaming then  
663 dipped into the overnight culture and carefully stabbed into the swim plate. The needle was re-  
664 inoculated for each stab and was re-sterilized for each strain. The diameter of growth for each  
665 strain was measured at the maximum distance away from the inoculation centre that bacteria  
666 were visible, at 24 and 48 h either manually using a ruler or digitally using a photograph and  
667 ImageJ (73). Experiments were repeated at least 3 times for all strains in each media, always  
668 including at least one wild-type to be used as a normalizing control. Collected data were  
669 processed in R to normalize the size of the growth diameter to the corresponding wild-type size  
670 at 24 and 48 h. The data were analyzed in a number of ways and it was determined that pooling  
671 the normalized data from 24 and 48 h to produce at least 6 replicates resulted in smaller error  
672 bars. Tukey’s Honest Significant Differences test was used to determine if the differences  
673 between strains were significant for each carbon source. As the TukeyHSD() function in R (61)  
674 tests ALL pair-wise comparisons, only those comparing each strain to the wild-type are  
675 presented here. However, this makes these results more robust as the false positive correction for  
676 a confidence level of 0.95 was applied to all 325 comparisons which were tested.

677



678 Chemotaxis Swim Plates

679 Strains were grown up overnight as before, then 1 mL was pelleted, washed once with 1  
680 mL minimal salts media (no carbon source) then resuspended in 100  $\mu$ L minimal salts media (no  
681 carbon source). 20  $\mu$ L was spotted at the edge of a minimal salts media plate containing no  
682 carbon source and 0.3% agar. Either an agar plug containing 50 mM carbon source or small  
683 amount of crystals was placed in the centre and plates were incubated overnight at 30°C. Plates  
684 were photographed and positive chemotaxis was interpreted as an arc of cells nearer to the centre  
685 of the plate than the cells had been spotted.

686 Growth Curves

687 To ensure that the genetic manipulations had no effect on the growth of any of the strains,  
688 growth was assayed over 24h. Overnight cultures of all strains were normalized to OD 0.1 then  
689 diluted 1/100 into 200  $\mu$ L minimal salts media with 10mM pyruvate in a 96 well microtiter plate.  
690 The plate was incubated at 30°C, shaking at 150RPM and the OD600 was checked every 6h.

691 Complementation

692 Aer.g1 was complemented into the wild-type and the quintuple mutant (Aer-  
693 2/CttP/Aer.g1/Aer.g2/Aer.g4) to demonstrate its importance in energy-taxis. Aer.g1 was cloned  
694 by PCR amplifying the gene from genomic DNA using one of the deletion construct primers and  
695 an additional primer that annealed ending within the start codon of Aer.g1. A HindIII site was  
696 added to this primer and the opposite outer primer from the deletion construct was used to  
697 amplify the Aer.g1 gene. A pre-existing BamHI site 36nt from the end of the gene was taken  
698 advantage of when the gel purified (EZDNA gel extraction kit, Omega Bio-Tek, USA) product  
699 was digested alongside pSEVA\_342 (74). Digested products were purified, ligated and  
700 transformed into Top10F' the same as the deletion constructs. After confirming the insert by

701 sequencing (Eurofins, USA) the complementation and empty vector were transformed into the  
702 wild-type and quintuple deletion mutant as before, only 30 $\mu$ g/mL chloramphenicol was used to  
703 select for transformants. Resistant colonies of *P. pseudoalcaligenes* KF707 were picked into LB  
704 to make stocks. For the energy-taxis assays, overnight cultures were grown with 30 $\mu$ g/mL  
705 chloramphenicol. Instead of directly comparing to the wild-type, these strains were compared  
706 based on their change in energy-taxis diameters over 24h. All plasmids used in this study are  
707 summarized in Supplementary Table 6.

708

### 709 **Acknowledgements**

710 The authors would like to thank Stephana Cherak for her technical assistance, and Iain George  
711 and Dr. Gordon Chua for use of their imaging setup for photographing the swim plates. We  
712 thank Dr. Martina Cappelletti for assistance with the colony PCR design and her insights into  
713 KF707 physiology and genomic interpretation. This project was funded by Natural Sciences and  
714 Engineering Research Council (NSERC) of Canada Discovery Grant RGPIN/219895-2010 to  
715 RJT.

716

717

718 **References**

- 719 1. **Wadhams GH, Armitage JP.** 2004. Making sense of it all: Bacterial chemotaxis. *Nat*  
720 *Rev Microbiol* **5**:1024–1037.
- 721 2. **Sampedro I, Parales RE, Krell T, Hill JE.** 2015. Pseudomonas chemotaxis. *FEMS*  
722 *Microbiol Rev* **39**:17–46.
- 723 3. **Krell T.** 2015. Tackling the bottleneck in bacterial signal transduction research: high-  
724 throughput identification of signal molecules. *Mol Microbiol* **96**:685–8.
- 725 4. **Alexandre G, Greer-Phillips S, Zhulin IB.** 2004. Ecological role of energy taxis in  
726 microorganisms. *FEMS Microbiol Rev* **28**:113–26.
- 727 5. **Rebbapragada A, Johnson MS, Harding GP, Zuccarelli AJ, Fletcher HM, Zhulin IB,**  
728 **Taylor BL.** 1997. The Aer protein and the serine chemoreceptor Tsr independently sense  
729 intracellular energy levels and transduce oxygen, redox, and energy signals for  
730 *Escherichia coli* behavior. *Proc Natl Acad Sci U S A* **94**:10541–6.
- 731 6. **Bibikov SI, Biran R, Rudd KE, Parkinson JS.** 1997. A signal transducer for aerotaxis in  
732 *Escherichia coli*. *J Bacteriol* **179**:4075–4079.
- 733 7. **Samanta D, Widom J, Borbat PP, Freed JH, Crane BR.** 2016. Bacterial Energy Sensor  
734 Aer Modulates the Activity of the Chemotaxis Kinase CheA Based on the Redox State of  
735 the Flavin Cofactor. *J Biol Chem* **291**:25809–25814.
- 736 8. **Hong CS, Shitashiro M, Kuroda A, Ikeda T, Takiguchi N, Ohtake H, Kato J.** 2004.  
737 Chemotaxis proteins and transducers for aerotaxis in *Pseudomonas aeruginosa*. *FEMS*  
738 *Microbiol Lett* **231**:247–252.

- 739 9. **Sarand I, Österberg S, Holmqvist S, Holmfeldt P, Skärfstad E, Parales RE, Shingler**  
740 **V.** 2008. Metabolism-dependent taxis towards (methyl)phenols is coupled through the  
741 most abundant of three polar localized Aer-like proteins of *Pseudomonas putida*. *Environ*  
742 *Microbiol* **10**:1320–1334.
- 743 10. **Nichols NN, Harwood CS.** 2000. An aerotaxis transducer gene from *Pseudomonas putida*.  
744 *FEMS Microbiol Lett* **182**:177–183.
- 745 11. **Luu R a., Schneider BJ, Ho CC, Nesteryuk V, Ngwesse SE, Liu X, Parales J V., Ditty**  
746 **JL, Parales RE.** 2013. Taxis of *Pseudomonas putida* F1 toward phenylacetic acid is  
747 mediated by the energy taxis receptor AER2. *Appl Environ Microbiol* **79**:2416–2423.
- 748 12. **Watts KJ, Taylor BL, Johnson MS.** 2011. PAS/poly-HAMP signalling in Aer-2, a  
749 soluble haem-based sensor. *Mol Microbiol* **79**:686–99.
- 750 13. **Güvener ZT, Tifrea DF, Harwood CS.** 2006. Two different *Pseudomonas aeruginosa*  
751 chemosensory signal transduction complexes localize to cell poles and form and remould  
752 in stationary phase. *Mol Microbiol* **61**:106–18.
- 753 14. **Shitashiro M, Tanaka H, Hong CS, Kuroda A, Takiguchi N, Ohtake H, Kato J.** 2005.  
754 Identification of chemosensory proteins for trichloroethylene in *Pseudomonas aeruginosa*.  
755 *J Biosci Bioeng* **99**:396–402.
- 756 15. **Pham HT, Parkinson JS.** 2011. Phenol sensing by *Escherichia coli* chemoreceptors: a  
757 nonclassical mechanism. *J Bacteriol* **193**:6597–604.
- 758 16. **Bodilis J, Nsique Meilo S, Cornelis P, De Vos P, Barray S.** 2011. A long-branch  
759 attraction artifact reveals an adaptive radiation in *pseudomonas*. *Mol Biol Evol* **28**:2723–6.

- 760 17. **Gomila M, Peña A, Mulet M, Lalucat J, García-Valdés E.** 2015. Phylogenomics and  
761 systematics in *Pseudomonas*. *Front Microbiol* **6**:214.
- 762 18. **Altschul SF, Gish W, Miller W, Myers EW, Lipman DJ.** 1990. Basic local alignment  
763 search tool. *J Mol Biol* **215**:403–10.
- 764 19. **Papadopoulos JS, Agarwala R.** 2007. COBALT: Constraint-based alignment tool for  
765 multiple protein sequences. *Bioinformatics* **23**:1073–1079.
- 766 20. **Guindon S, Gascuel O.** 2003. A Simple, Fast, and Accurate Algorithm to Estimate Large  
767 Phylogenies by Maximum Likelihood. *Syst Biol* **52**:696–704.
- 768 21. **Guindon S, Dufayard J, Lefort V.** 2010. New Algorithms and Methods to Estimate  
769 Maximum-Likelihood Phylogenies : Assessing the Performance of PhyML 3 . 0. *Syst Biol*  
770 **59**:307–21.
- 771 22. **Brandt BW, Feenstra KA, Heringa J.** 2010. Multi-Harmony: detecting functional  
772 specificity from sequence alignment. *Nucleic Acids Res* **38**:W35-40.
- 773 23. **Özen AI, Ussery DW.** 2012. Defining the *Pseudomonas* genus: where do we draw the  
774 line with *Azotobacter*? *Microb Ecol* **63**:239–48.
- 775 24. **Schultz J, Copley RR, Doerks T, Ponting CP, Bork P.** 2000. SMART: a web-based tool  
776 for the study of genetically mobile domains. *Nucleic Acids Res* **28**:231–4.
- 777 25. **Garcia D, Watts KJ, Johnson MS, Taylor BL.** 2016. Delineating PAS-HAMP  
778 interaction surfaces and signalling-associated changes in the aerotaxis receptor Aer. *Mol*  
779 *Microbiol* **100**:156–172.

- 780 26. **Alexander RP, Zhulin IB.** 2007. Evolutionary genomics reveals conserved structural  
781 determinants of signaling and adaptation in microbial chemoreceptors. *Proc Natl Acad Sci*  
782 *U S A* **104**:2885–90.
- 783 27. **Hmelo LR, Borlee BR, Almblad H, Love ME, Randall TE, Tseng BS, Lin C, Irie Y,**  
784 **Storek KM, Yang JJ, Siehnel RJ, Howell PL, Singh PK, Tolker-Nielsen T, Parsek**  
785 **MR, Schweizer HP, Harrison JJ.** 2015. Precision-engineering the *Pseudomonas*  
786 *aeruginosa* genome with two-step allelic exchange. *Nat Protoc* **10**:1820–1841.
- 787 28. **Harwood CS, Nichols NN, Kim M, Diitty JL, Parales RE.** 1994. Identification of the  
788 *pcaRKF* Gene Cluster from *Pseudomonas*. *Biotechniques* **176**:6479–6488.
- 789 29. **Tremaroli V, Fedi S, Tamburini S, Viti C, Tatti E, Ceri H, Turner RJ, Zannoni D.**  
790 2011. A histidine-kinase *cheA* gene of *Pseudomonas pseudoalcaligenes* KF707 not only  
791 has a key role in chemotaxis but also affects biofilm formation and cell metabolism.  
792 *Biofouling* **27**:33–46.
- 793 30. **Nichols NN, Harwood CS.** 2000. An aerotaxis transducer gene from *Pseudomonas putida*.  
794 *FEMS Microbiol Lett* **182**:177–183.
- 795 31. **Sarand I, Österberg S, Holmqvist S, Holmfeldt P, Skärfstad E, Parales RE, Shingler**  
796 **V.** 2008. Metabolism-dependent taxis towards (methyl)phenols is coupled through the  
797 most abundant of three polar localized Aer-like proteins of *Pseudomonas putida*. *Environ*  
798 *Microbiol* **10**:1320–1334.
- 799 32. **Luu R a., Schneider BJ, Ho CC, Nesteryuk V, Ngwesse SE, Liu X, Parales J V., Ditty**  
800 **JL, Parales RE.** 2013. Taxis of *Pseudomonas putida* F1 toward phenylacetic acid is

- 801 mediated by the energy taxis receptor AER2. *Appl Environ Microbiol* **79**:2416–2423.
- 802 33. **García-Fontana C, Corral Lugo A, Krell T.** 2014. Specificity of the CheR2  
803 methyltransferase in *Pseudomonas aeruginosa* is directed by a C-terminal pentapeptide in  
804 the McpB chemoreceptor. *Sci Signal* **7**:ra34.
- 805 34. **Henry JT, Crosson S.** 2011. Ligand-Binding PAS Domains in a Genomic, Cellular, and  
806 Structural Context. *Annu Rev Microbiol* **65**:261–286.
- 807 35. **Ortega DR, Fleetwood AD, Krell T, Harwood CS, Jensen GJ, Zhulin IB.** 2017.  
808 Assigning chemoreceptors to chemosensory pathways in *Pseudomonas aeruginosa*. *Proc*  
809 *Natl Acad Sci* 201708842.
- 810 36. **Taylor BL.** 2007. Aer on the inside looking out: paradigm for a PAS?HAMP role in  
811 sensing oxygen, redox and energy. *Mol Microbiol* **65**:1415–1424.
- 812 37. **Parkinson JS.** 2010. Signaling mechanisms of HAMP domains in chemoreceptors and  
813 sensor kinases. *Annu Rev Microbiol* **64**:101–122.
- 814 38. **Williams KP, Gillespie JJ, Sobral BWS, Nordberg EK, Snyder EE, Shalom JM,**  
815 **Dickerman AW.** 2010. Phylogeny of gammaproteobacteria. *J Bacteriol* **192**:2305–14.
- 816 39. **Behrens W, Schweinitzer T, McMurry JL, Loewen PC, Buettner FFR, Menz S,**  
817 **Josenhans C.** 2016. Localisation and protein-protein interactions of the *Helicobacter*  
818 *pylori* taxis sensor TlpD and their connection to metabolic functions. *Sci Rep* **6**:23582.
- 819 40. **Pei J, Mitchell DA, Dixon JE, Grishin N V.** 2011. Expansion of Type II CAAX  
820 Proteases Reveals Evolutionary Origin of  $\gamma$ -Secretase Subunit APH-1 *Journal of Molecular*  
821 *Biology*.

- 822 41. **Nishiyama S, Ohno S, Ohta N, Inoue Y, Fukuoka H, Ishijima A, Kawagishi I.** 2010.  
823 Thermosensing function of the *Escherichia coli* redox sensor Aer. *J Bacteriol* **192**:1740–3.
- 824 42. **Yang Y, Sourjik V.** 2012. Opposite responses by different chemoreceptors set a tunable  
825 preference point in *Escherichia coli* pH taxis. *Mol Microbiol* **86**:1482–1489.
- 826 43. **Bardy SL, Briegel A, Rainville S, Krell T.** 2017. Recent advances and future prospects  
827 in bacterial and archaeal locomotion and signal transduction. *J Bacteriol* **199**:e00203-17.
- 828 44. **Österberg S, Åberg A, Herrera Seitz MK, Wolf-Watz M, Shingler V.** 2013. Genetic  
829 dissection of a motility-associated c-di-GMP signalling protein of *Pseudomonas putida*.  
830 *Environ Microbiol Rep* **5**:556–65.
- 831 45. **Xu L, Xin L, Zeng Y, Yam JKH, Ding Y, Venkataramani P, Cheang QW, Yang X,**  
832 **Tang X, Zhang L-H, Chiam K-H, Yang L, Liang Z-X.** 2016. A cyclic di-GMP-binding  
833 adaptor protein interacts with a chemotaxis methyltransferase to control flagellar motor  
834 switching. *Sci Signal* **9**.
- 835 46. **Zhulin IB.** 2001. The superfamily of chemotaxis transducers: From physiology to  
836 genomics and back. *Adv Microb Physiol* **45**:157–198.
- 837 47. **Borziak K, Fleetwood AD, Zhulin IB.** 2013. Chemoreceptor gene loss and acquisition  
838 via horizontal gene transfer in *Escherichia coli*. *J Bacteriol* **195**:3596–602.
- 839 48. **Qiu X, Kulasekara BR, Lory S.** 2009. Role of Horizontal Gene Transfer in the Evolution  
840 of *Pseudomonas aeruginosa* Virulence. *Genome Dyn* **6**:126–39.
- 841 49. **Sengeløv G, Kristensen KJ, Sørensen AH, Kroer N, Sørensen SJ.** 2001. Effect of  
842 Genomic Location on Horizontal Transfer of a Recombinant Gene Cassette Between



- 843 Pseudomonas Strains in the Rhizosphere and Spermosphere of Barley Seedlings. *Curr*  
844 *Microbiol* **42**:160–167.
- 845 50. **Tremaroli V, Suzzi CV, Fedi S, Ceri H, Zannoni D, Turner RJ.** 2010. Tolerance of  
846 *Pseudomonas pseudoalcaligenes* KF707 to metals, polychlorobiphenyls and  
847 chlorobenzoates: Effects on chemotaxis-, biofilm- and planktonic-grown cells. *FEMS*  
848 *Microbiol Ecol* **74**:291–301.
- 849 51. **Fedi S, Triscari-Barberi T, Nappi MR, Sandri F, Booth SC, Turner RJ, Attimonelli**  
850 **M, Cappelletti M, Zannoni D.** 2016. The Role of *cheA* Genes in Swarming and  
851 Swimming Motility of *Pseudomonas pseudoalcaligenes* KF707. *Microbes Environ* **31**:169–  
852 172.
- 853 52. **Yao J, Allen C.** 2007. The plant pathogen *Ralstonia solanacearum* needs aerotaxis for  
854 normal biofilm formation and interactions with its tomato host. *J Bacteriol* **189**:6415–6424.
- 855 53. **Boin MA, Häse CC.** 2007. Characterization of *Vibrio cholerae* aerotaxis. *FEMS*  
856 *Microbiol Lett* **276**:193–201.
- 857 54. **Ferrandez A, Hawkins AC, Summerfield DT, Harwood CS.** 2002. Cluster II *che* Genes  
858 from *Pseudomonas aeruginosa* Are Required for an Optimal Chemotactic Response. *J*  
859 *Bacteriol* **184**:4374–4383.
- 860 55. **Kim HE, Shitashiro M, Kuroda A, Takiguchi N, Ohtake H, Kato J.** 2006.  
861 Identification and characterization of the chemotactic transducer in *Pseudomonas*  
862 *aeruginosa* PAO1 for positive chemotaxis to trichloroethylene. *J Bacteriol* **188**:6700–6702.
- 863 56. **Ortega Á, Zhulin IB, Krell T.** 2017. Sensory Repertoire of Bacterial Chemoreceptors.

- 864 Microbiol Mol Biol Rev **81**:e00033-17.
- 865 57. **Tatusova T, Ciufu S, Fedorov B, O'Neill K, Tolstoy I.** 2014. RefSeq microbial genomes  
866 database: new representation and annotation strategy. *Nucleic Acids Res* **42**:D553-9.
- 867 58. **Cochrane G, Karsch-Mizrachi I, Takagi T, International Nucleotide Sequence  
868 Database Collaboration IN.** 2016. The International Nucleotide Sequence Database  
869 Collaboration. *Nucleic Acids Res* **44**:D48-50.
- 870 59. **Waterhouse AM, Procter JB, Martin DMA, Clamp M, Barton GJ.** 2009. Jalview  
871 Version 2--a multiple sequence alignment editor and analysis workbench. *Bioinformatics*  
872 **25**:1189–91.
- 873 60. **Edgar RC.** 2004. MUSCLE: multiple sequence alignment with high accuracy and high  
874 throughput. *Nucleic Acids Res* **32**:1792–1797.
- 875 61. **R Core Team.** 2014. R: A language and environment for statistical computing. R Found  
876 Stat Comput Vienna, Austria 2014.
- 877 62. **Wickham H.** 2011. ggplot2. *Wiley Interdiscip Rev Comput Stat* **3**:180–185.
- 878 63. **Marchler-Bauer A, Derbyshire MK, Gonzales NR, Lu S, Chitsaz F, Geer LY, Geer  
879 RC, He J, Gwadz M, Hurwitz DI, Lanczycki CJ, Lu F, Marchler GH, Song JS,  
880 Thanki N, Wang Z, Yamashita RA, Zhang D, Zheng C, Bryant SH.** 2015. CDD:  
881 NCBI's conserved domain database. *Nucleic Acids Res* **43**:D222-6.
- 882 64. **Crooks GE, Hon G, Chandonia JM, Brenner SE.** 2004. WebLogo: A sequence logo  
883 generator. *Genome Res* **14**:1188–1190.

- 884 65. **Katoh K, Standley DM.** 2013. MAFFT Multiple Sequence Alignment Software Version  
885 7: Improvements in Performance and Usability. *Mol Biol Evol* **30**:772–780.
- 886 66. **Deng W, Maust BS, Nickle DC, Learn GH, Liu Y, Heath L, Pond SLK, Mullins JI.**  
887 2010. DIVEIN: A web server to analyze phylogenies, sequence divergence, diversity, and  
888 informative sites. *Biotechniques* **48**:405–408.
- 889 67. **Huson DH, Scornavacca C.** 2012. Dendroscope 3: An Interactive Tool for Rooted  
890 Phylogenetic Trees and Networks. *Syst Biol* **61**:1061–1067.
- 891 68. **Triscari-Barberi T, Simone D, Calabrese FM, Attimonelli M, Hahn KR, Amoako KK,**  
892 **Turner RJ, Fedi S, Zannoni D.** 2012. Genome sequence of the polychlorinated-biphenyl  
893 degrader *Pseudomonas pseudoalcaligenes* KF707. *J Bacteriol* **194**:4426–4427.
- 894 69. **Ye J, Coulouris G, Zaretskaya I, Cutcutache I, Rozen S, Madden TL.** 2012. Primer-  
895 BLAST: a tool to design target-specific primers for polymerase chain reaction. *BMC*  
896 *Bioinformatics* **13**:134.
- 897 70. **Sambrook J, Fritsch EF, Maniatis T.** 1989. No Title. *Mol Biol A Lab Man.*
- 898 71. **Maseda H, Sawada I, Saito K, Uchiyama H, Nakae T, Nomura N.** 2004. Enhancement  
899 of the *mexAB-oprM* efflux pump expression by a quorum-sensing autoinducer and its  
900 cancellation by a regulator, *MexT*, of the *mexEF-oprN* efflux pump operon in  
901 *Pseudomonas aeruginosa*. *Antimicrob Agents Chemother* **48**:1320–8.
- 902 72. **Figurski DH, Helinski DR.** 1979. Replication of an origin-containing derivative of  
903 plasmid RK2 dependent on a plasmid function provided in trans. *Proc Natl Acad Sci U S*  
904 *A* **76**:1648–52.

- 905 73. **Schneider CA, Rasband WS, Eliceiri KW.** 2012. NIH Image to ImageJ: 25 years of  
906 image analysis. *Nat Methods* **9**:671–675.
- 907 74. **Silva-Rocha R, Martínez-García E, Calles B, Chavarría M, Arce-Rodríguez A, De**  
908 **Las Heras A, Páez-Espino AD, Durante-Rodríguez G, Kim J, Nickel PI, Platero R, De**  
909 **Lorenzo V.** 2013. The Standard European Vector Architecture (SEVA): A coherent  
910 platform for the analysis and deployment of complex prokaryotic phenotypes. *Nucleic*  
911 *Acids Res* **41**:D666–D675.
- 912

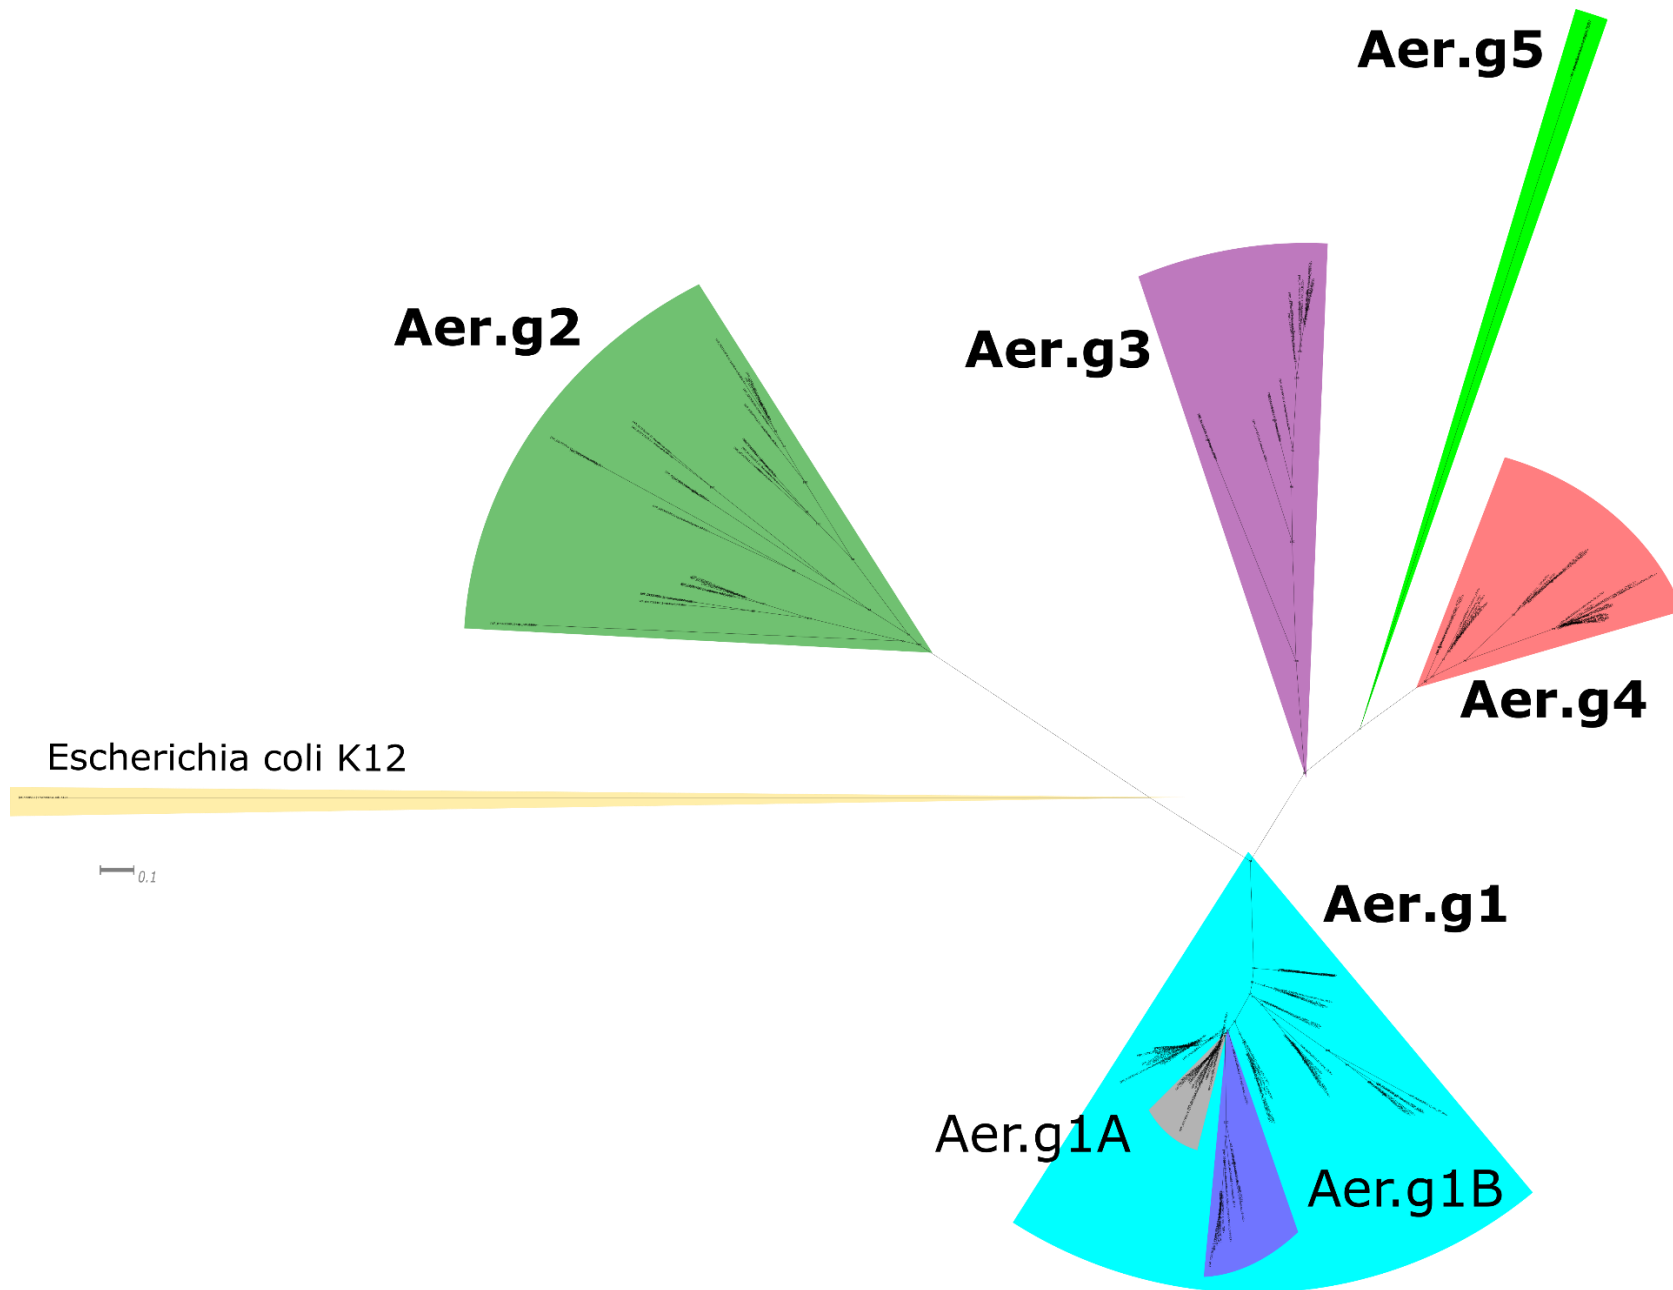

Supplementary Figure 1: Maximum-Likelihood consensus tree showing phylogenetic relationship between Aer protein sequences from *Pseudomonas* species, including Aer sequence from *E. coli*. Sequences were grouped according to branching pattern and inspection of the alignment, and were confirmed in subsequent analysis, see following figures and text for details. Numbers along branches indicate bootstrap support values from 100 replicates. Scale bar indicates branch length equivalent to 0.1 AA substitutions per site.

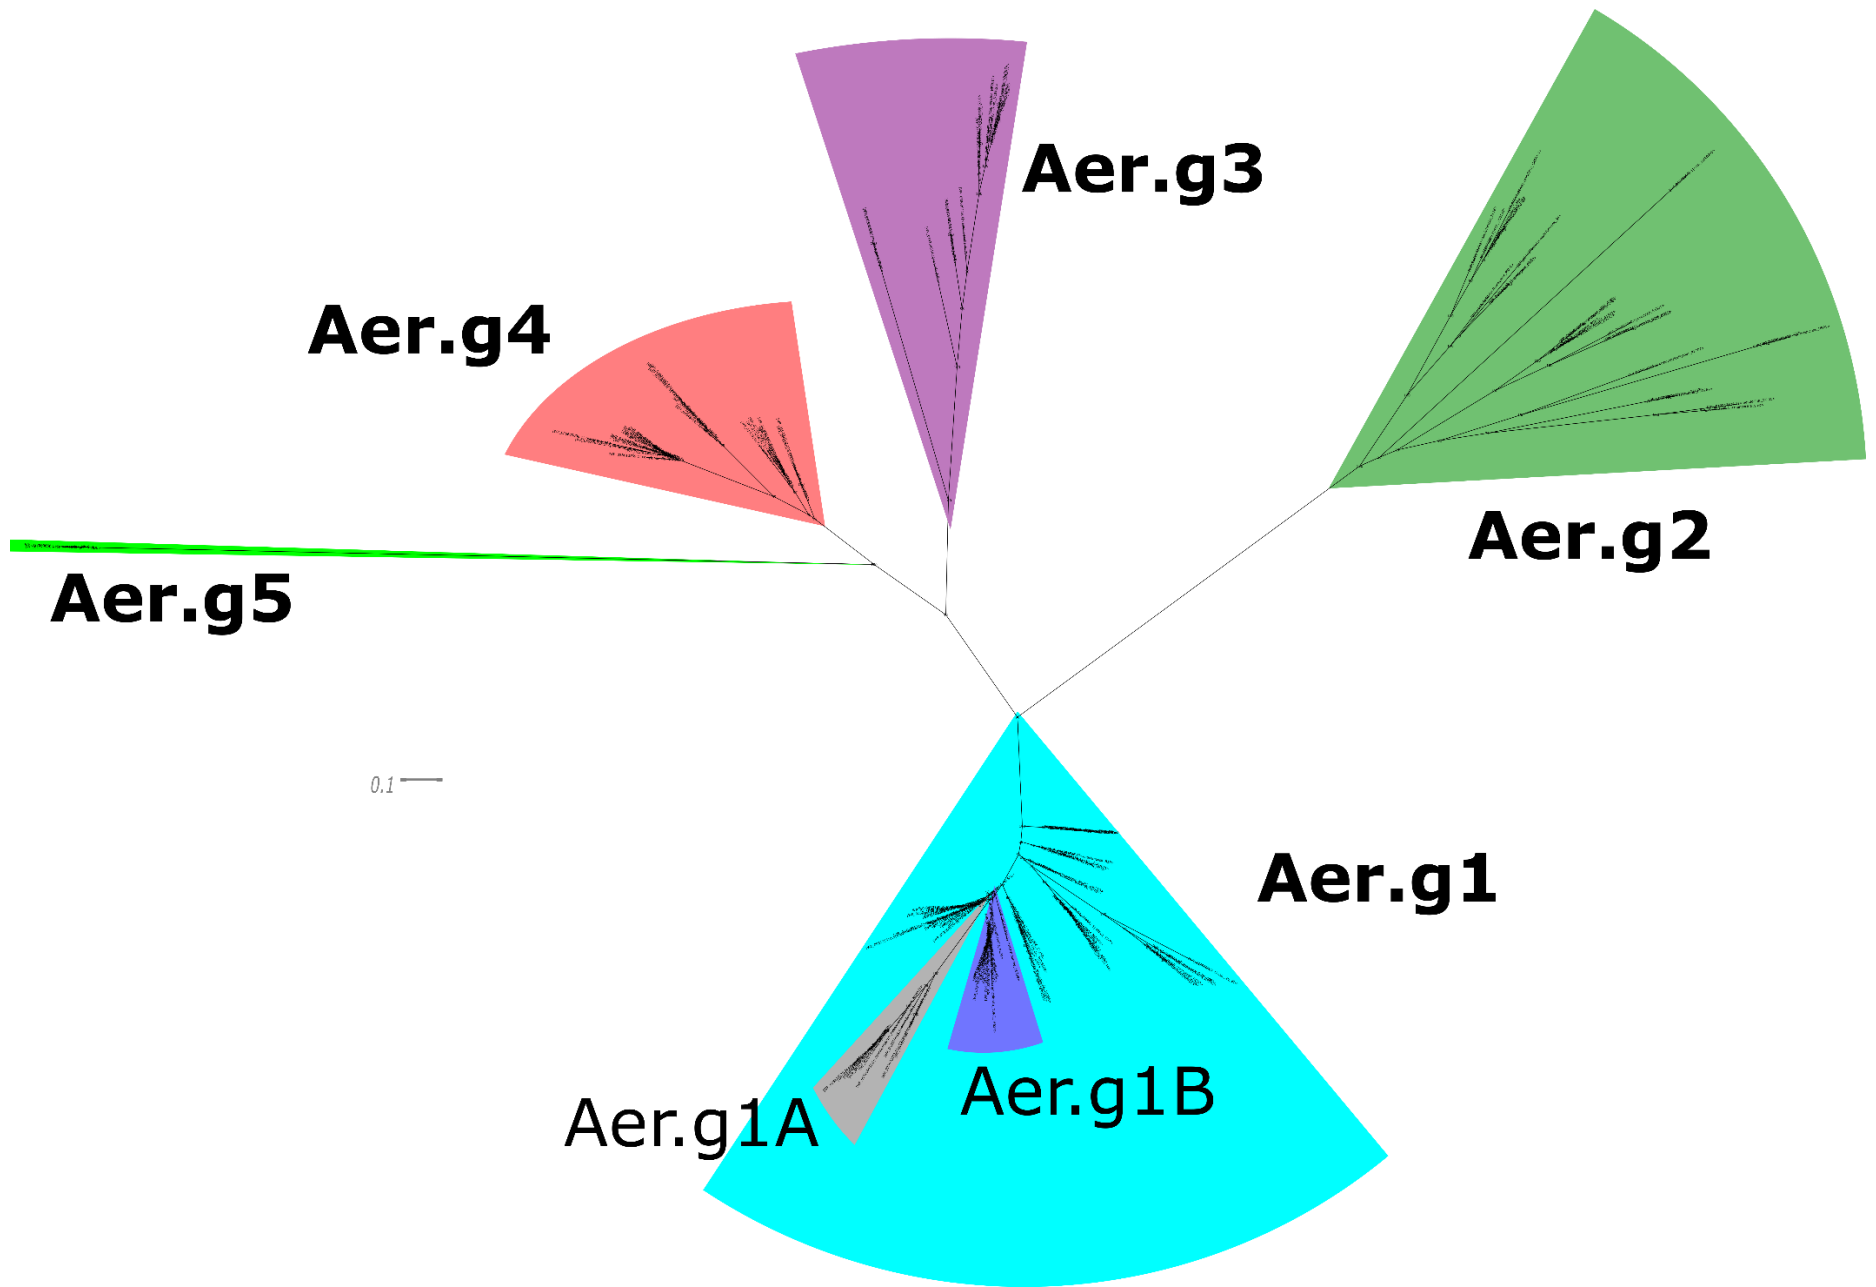

Supplementary Figure 2: Maximum-Likelihood consensus tree showing phylogenetic relationship between Aer protein sequences from *Pseudomonas* species. Sequences were grouped according to branching pattern and inspection of the alignment, and were confirmed in subsequent analysis, see following figures and text for details. Numbers along branches indicate bootstrap support values from 100 replicates. Scale bar indicates branch length equivalent to 0.1 AA substitutions per site.

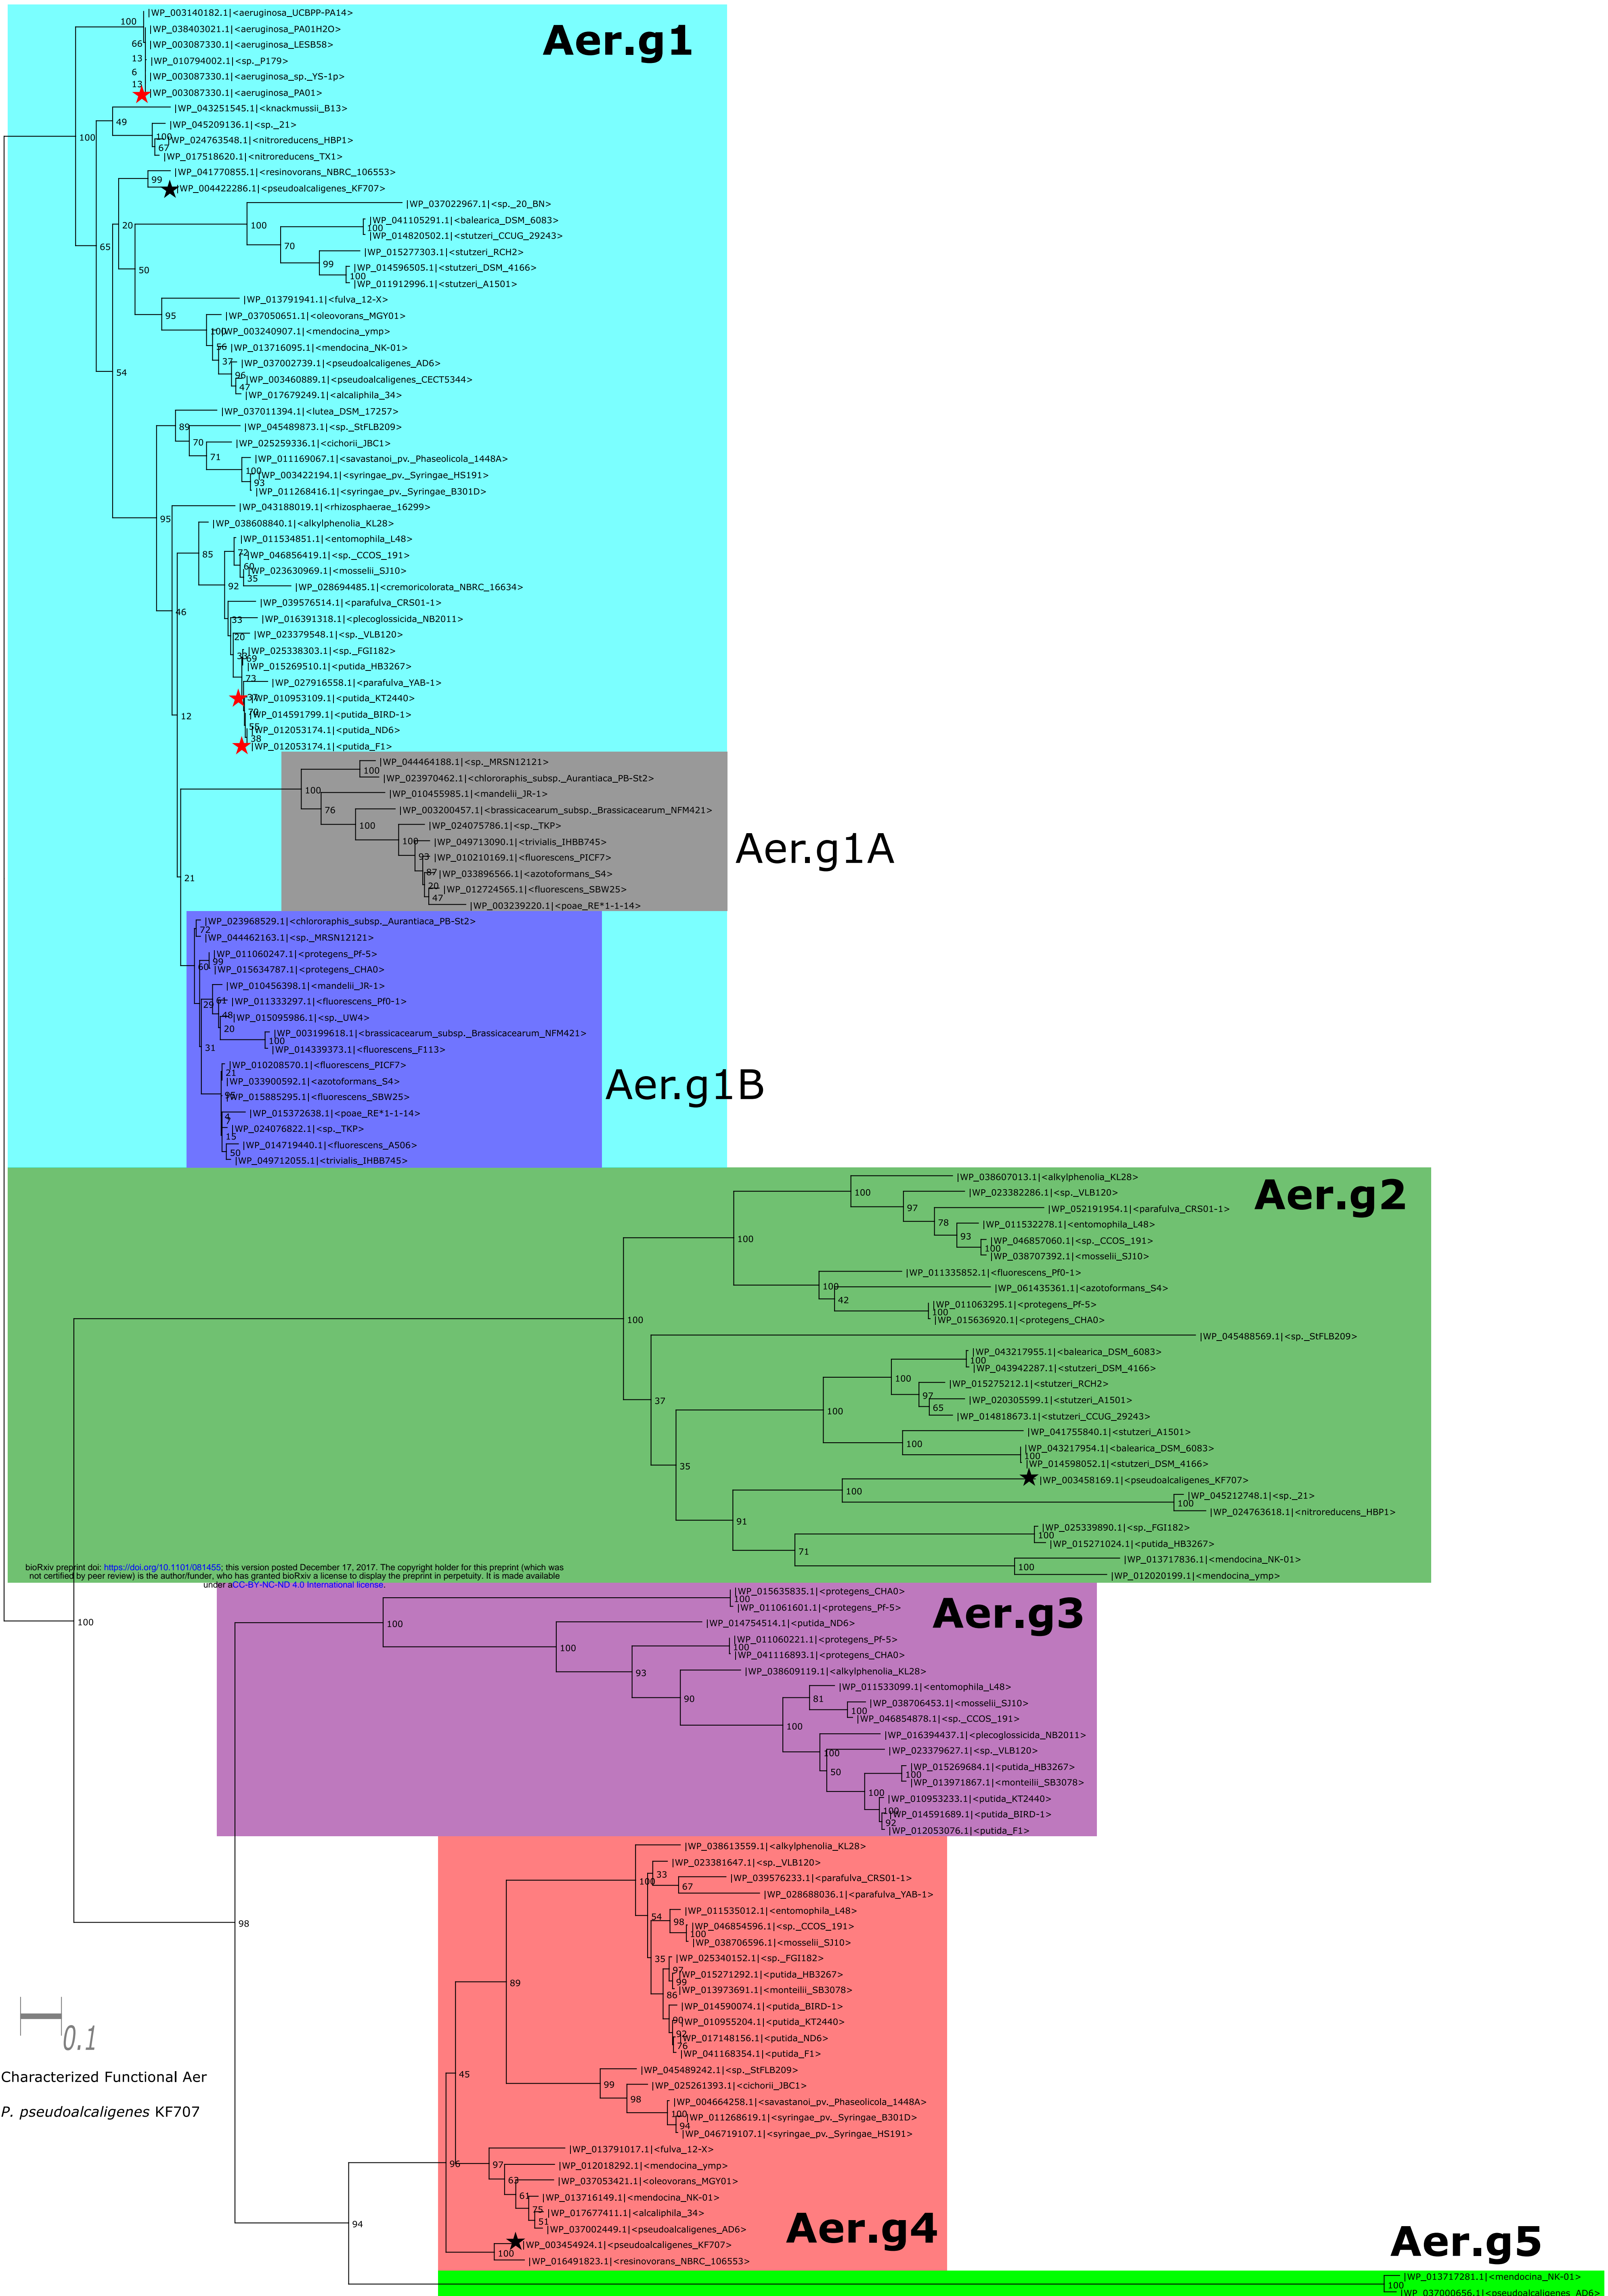

Supplementary Figure 3: Maximum-Likelihood consensus tree showing phylogenetic relationship between Aer protein sequences from *Pseudomonas* species. Sequences were grouped according to branching pattern and inspection of the alignment, and were confirmed in subsequent analysis, see following figures and text for details. The same characterized Aer sequences (red stars), sequences from *P. pseudoalcaligenes* KF707 (black stars) as Figure 1 are marked here. This tree is equivalent to the cladogram in Figure 1, only branch lengths and all labels are maintained. Tree was generated unrooted, then the root placed based on comparison between the unrooted tree and a tree rooted to Aer from *E. coli*, see Supplementary Figures 1 and 2 for details. Numbers along branches indicate bootstrap support values from 100 replicates. Scale bar indicates branch length equivalent to 0.1 AA substitutions per site.



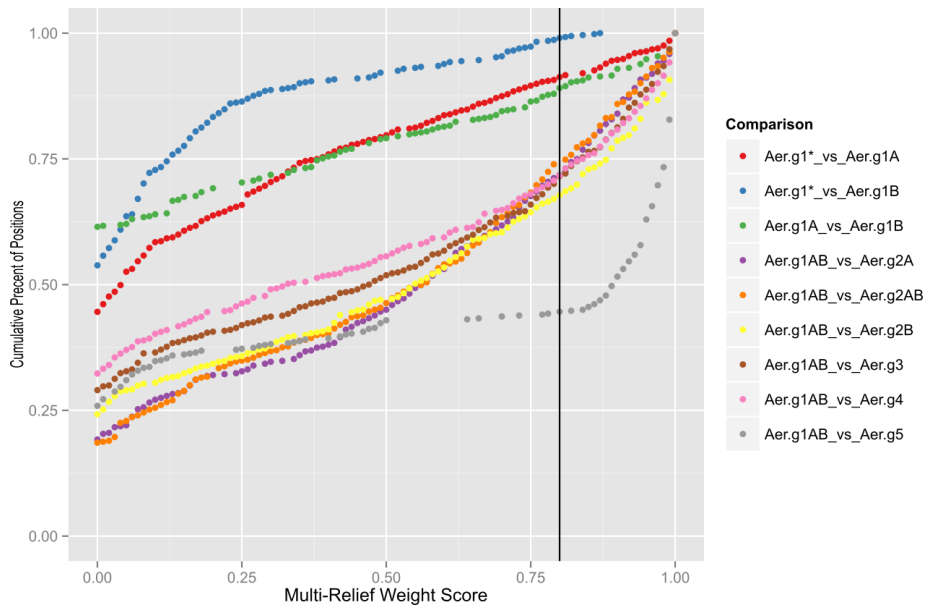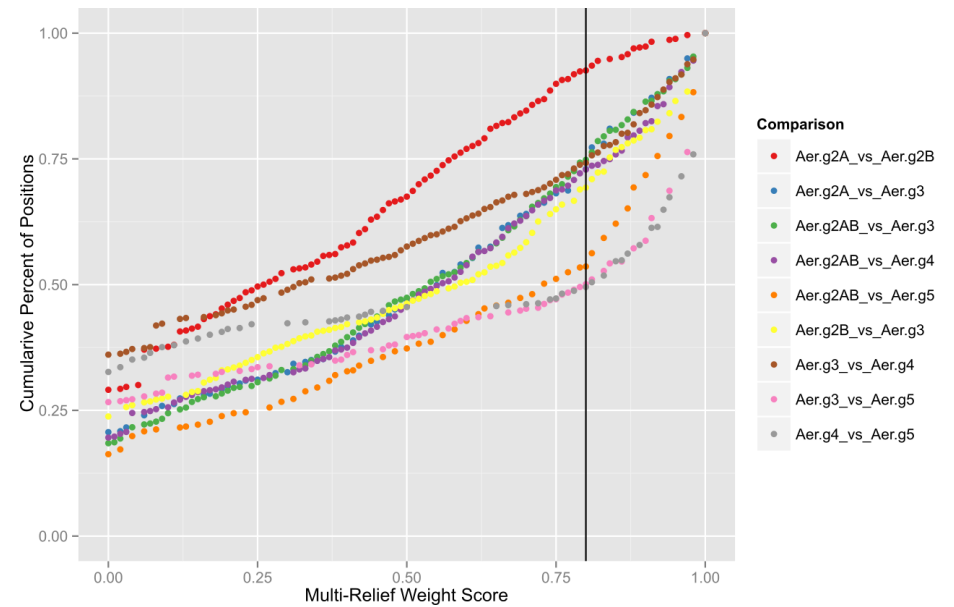

Supplementary Figure 4: Empirical cumulative distribution functions showing percent of amino acid positions at each multi-relief score value for comparisons of Aer homolog groups. Multi-relief weight scores  $\geq 0.8$  (black vertical line) indicate positions that are conserved within groups but not between groups. The point on the y-axis where each group comparison intersects with this line indicates the percentage of positions below the cutoff. Most group definitions result in  $\sim 25\%$  unique positions. Comparisons with group 5 show  $>50\%$  unique positions (Aer.g5 only has two sequences). Intragroup comparisons between 1A/1B and 2A/2B show that these comparisons only result in  $<15\%$  unique positions meaning their inclusion in their mother group is justified. Aer.g1\* indicates Aer.g1 sequences not including Aer.g1A and Aer.g1B. Aer.g1AB includes all Aer.g1 sequences including Aer.g1A and Aer.g1B.



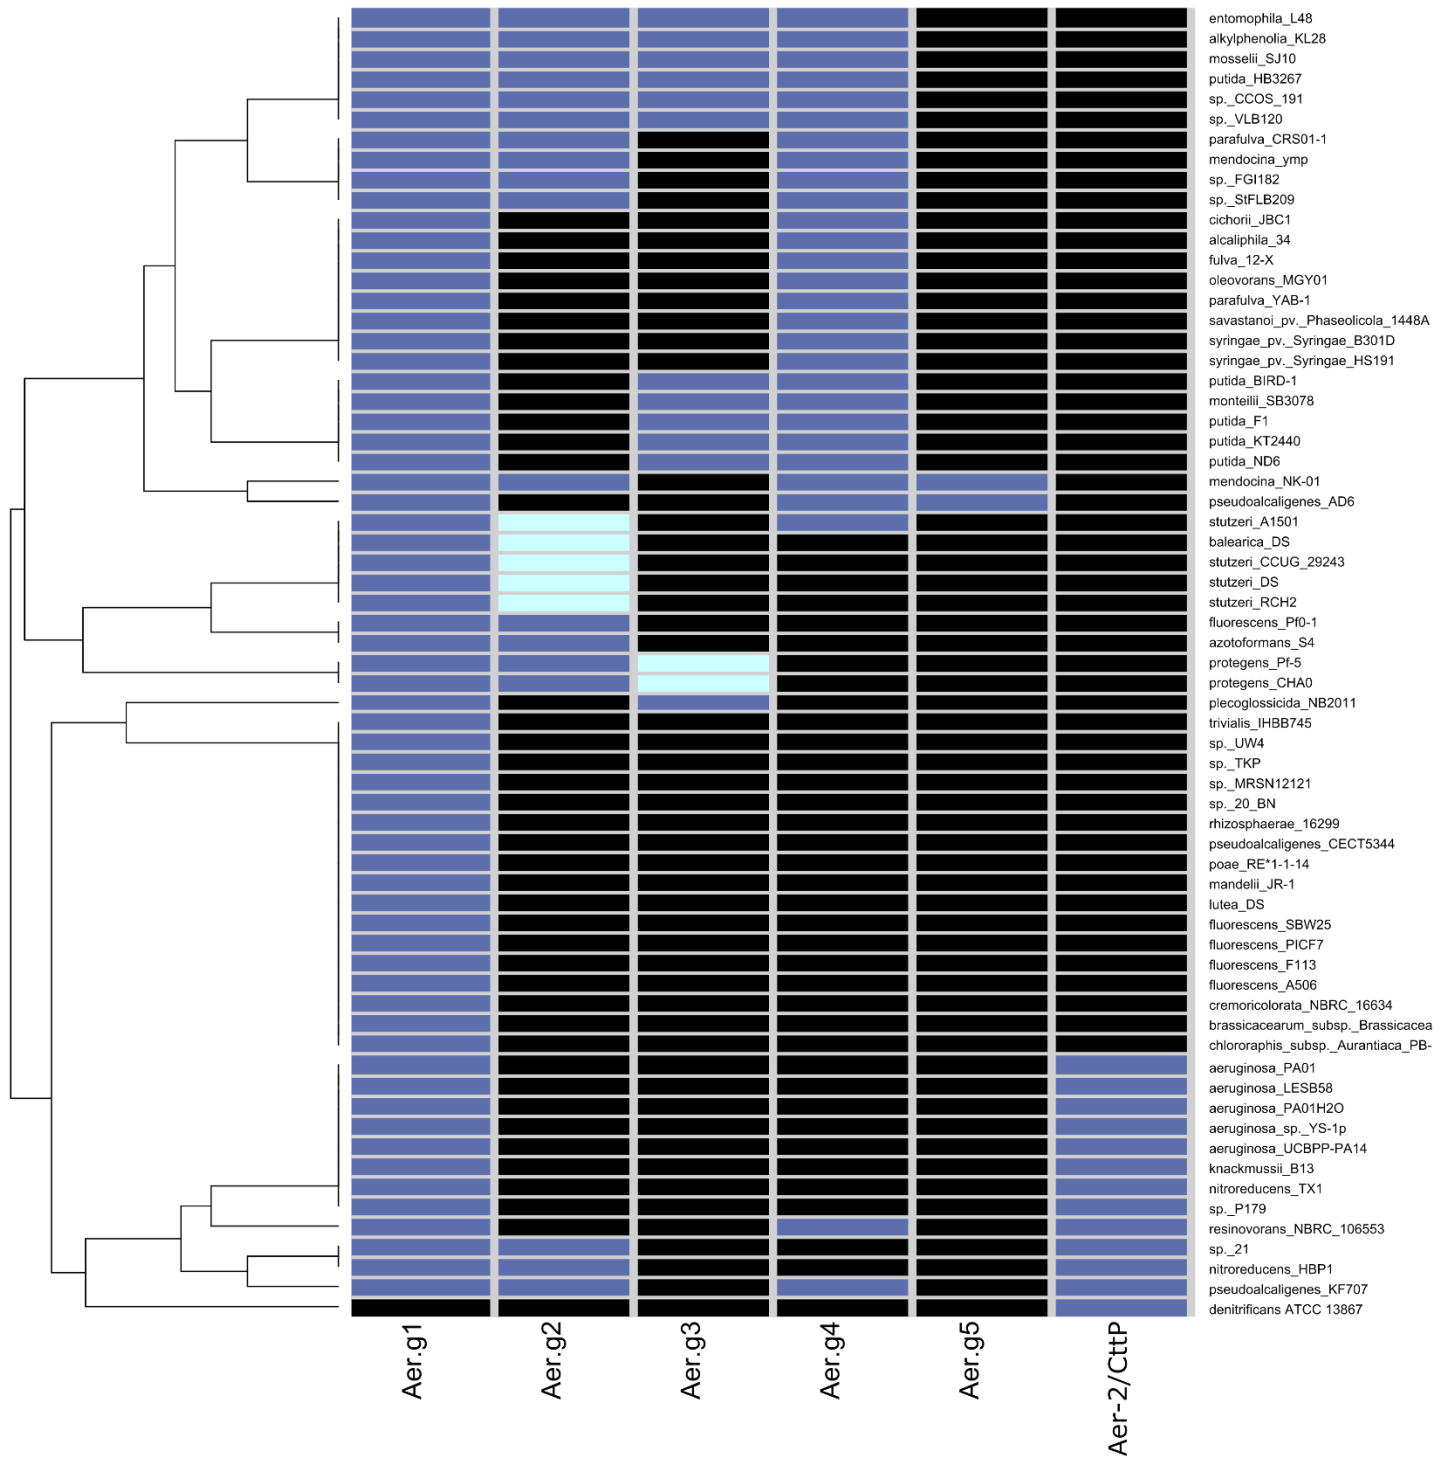

Supplementary Figure 5: Hierarchically clustered heatmap showing the presence and number of Aer homologs, Aer-2 and Cttp in select *Pseudomonas* species. Species were clustered using the Bray-Curtis distance metric and average linkages. The number of homologs that each strain possess is indicated by the box colour: zero (black), one (blue), two (cyan).

# Aer.g1

# gyrB/rpoB/rpoD

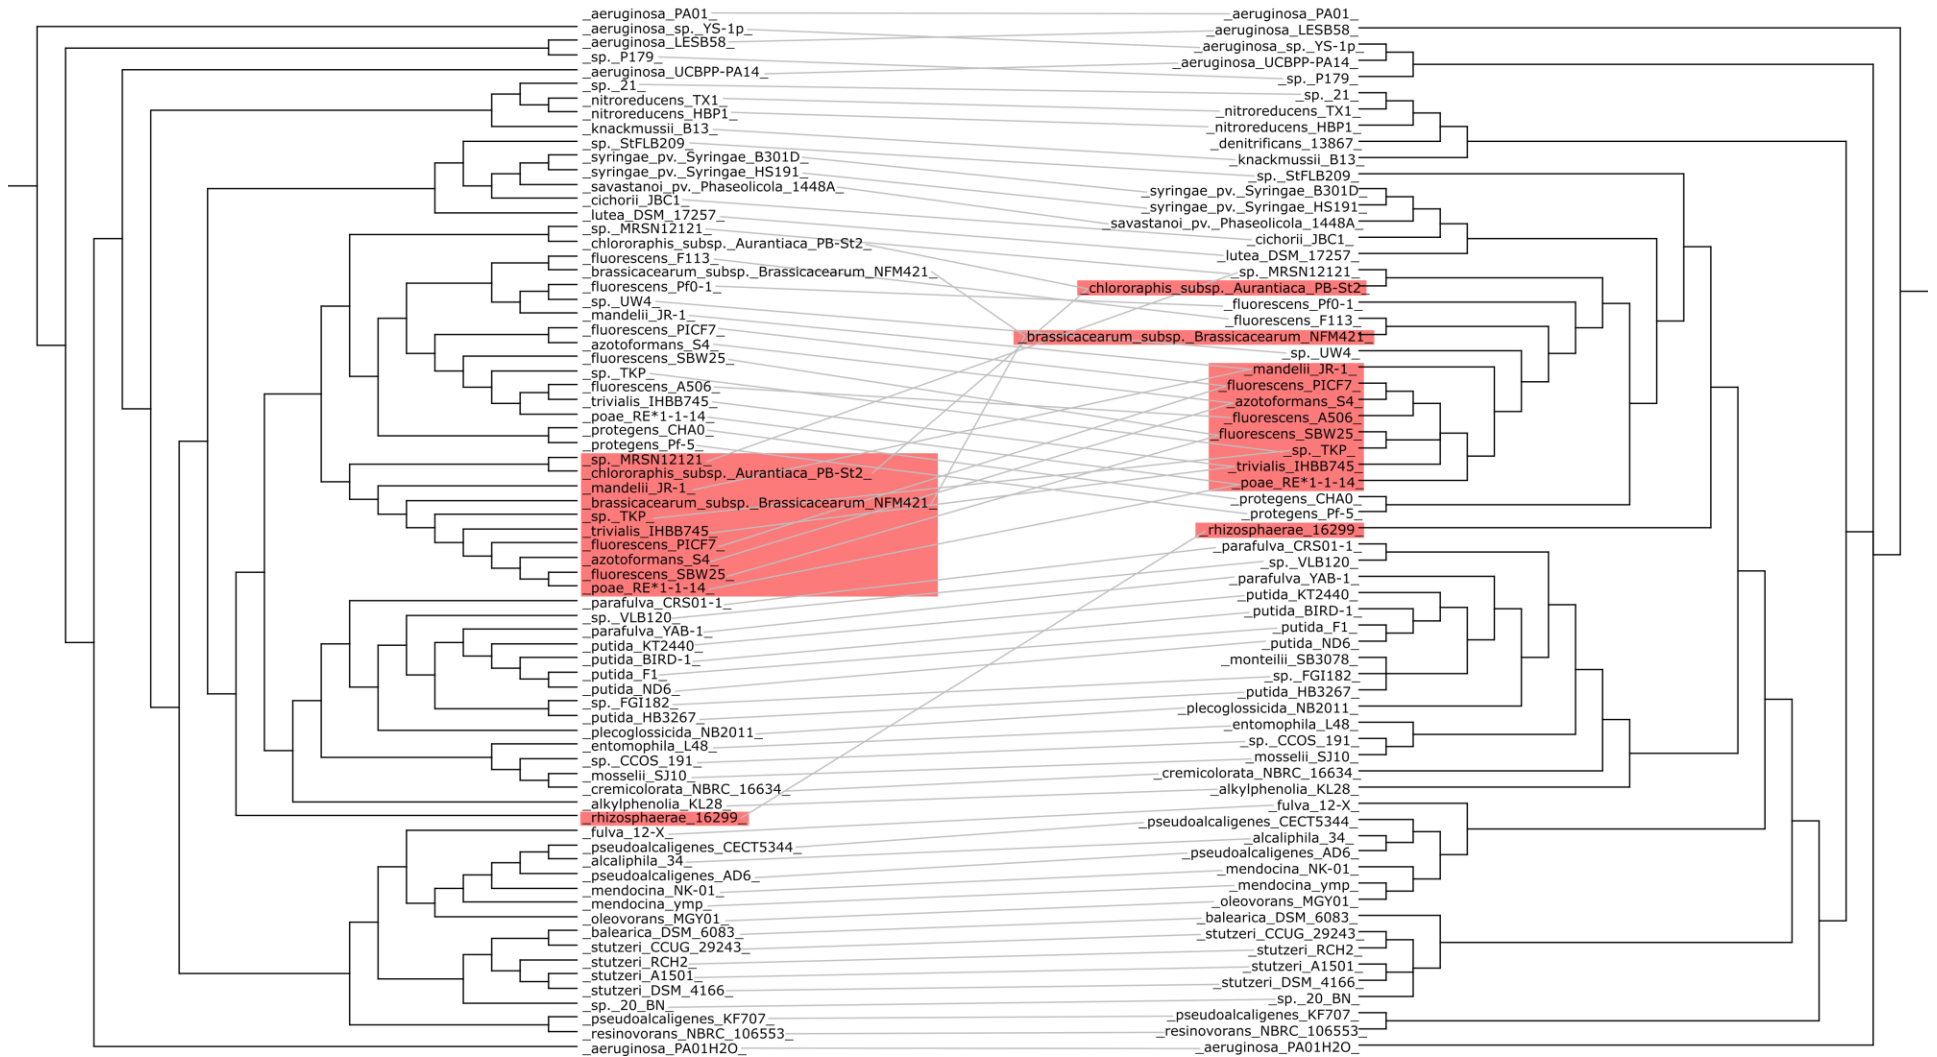

Supplementary Figure 6: Tanglegram showing tree matching between *Aer.g1* subgroup tree and *Pseudomonas* genus phylogeny. Only species with a matching *Aer* sequence are included in the genus phylogeny. Matches highlighted in red indicate incongruity between the *gyrB/rpoB/rpoD* nucleotide sequence based tree and the *Aer* protein sequence based tree.

# Aer.g2

# gyrB/rpoB/rpoD

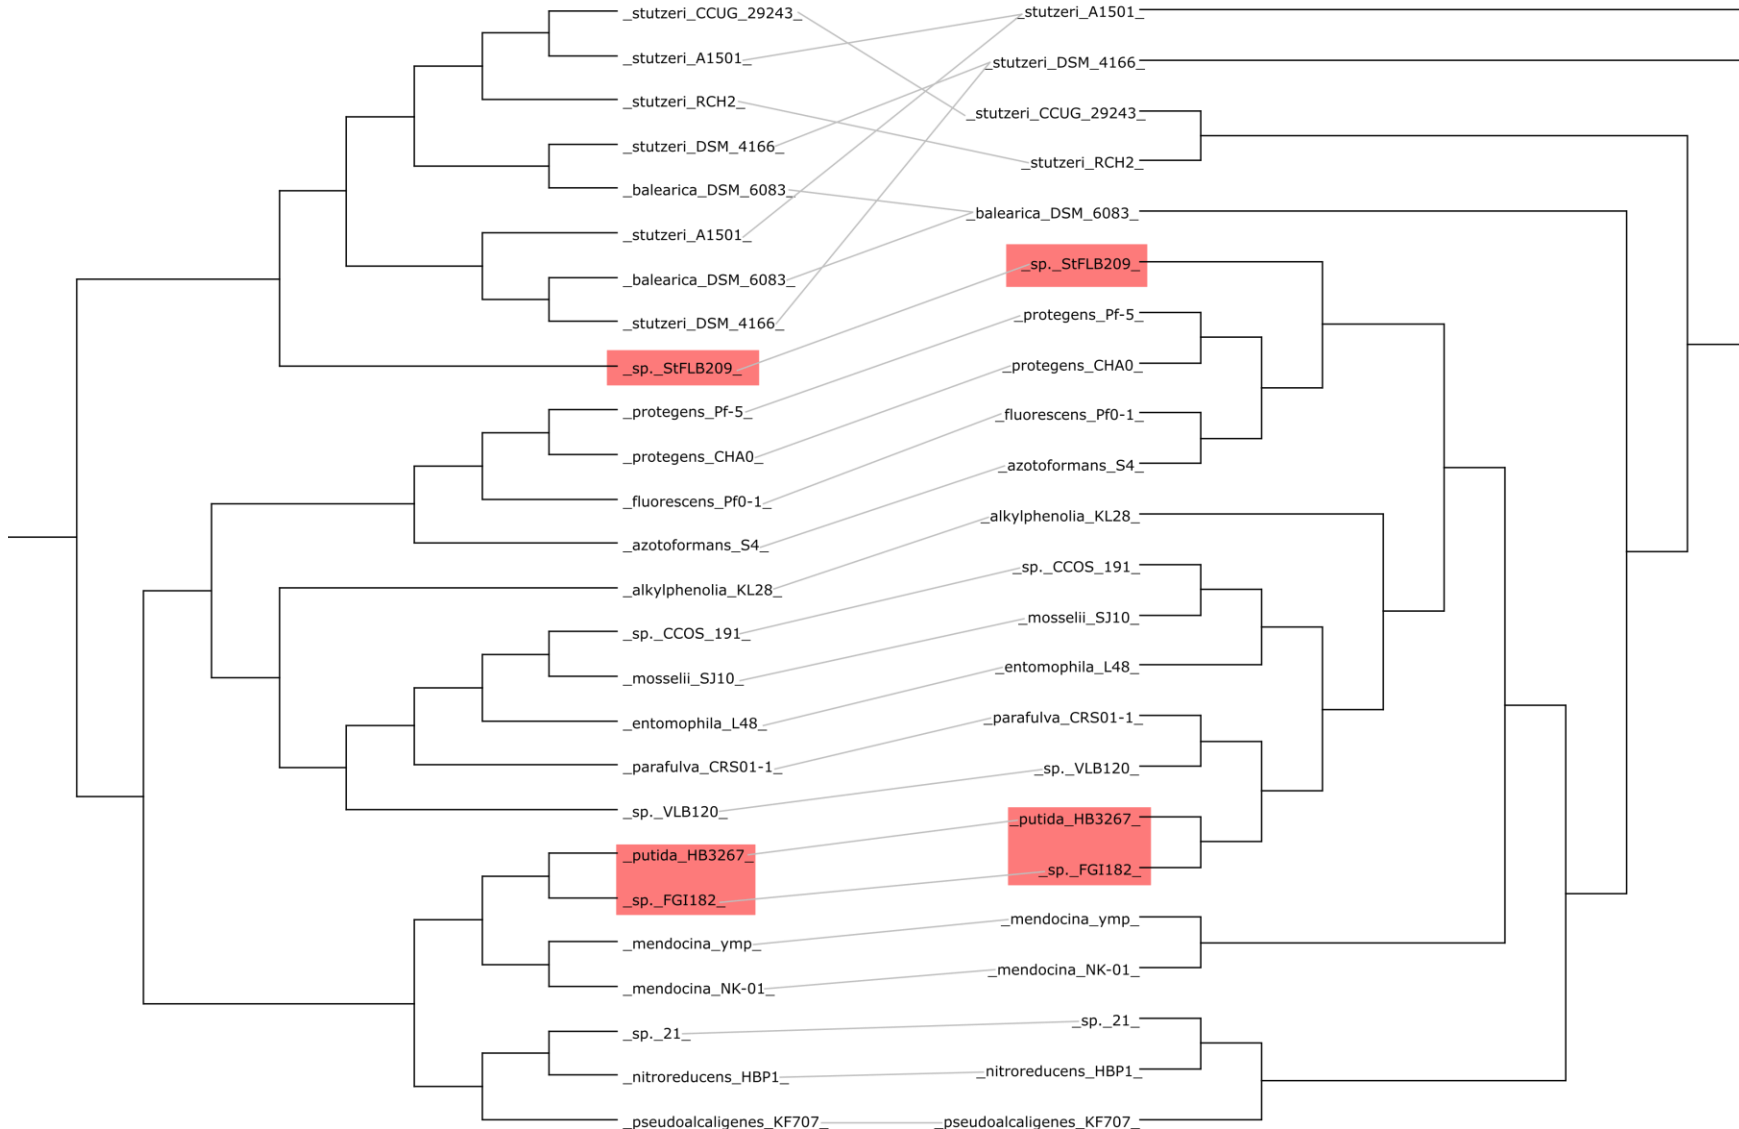

Supplementary Figure 7: Tanglegram showing tree matching between *Aer.g2* subgroup tree and *Pseudomonas* genus phylogeny. Only species with a matching *Aer* sequence are included in the genus phylogeny. Matches highlighted in red indicate incongruity between the *gyrB/rpoB/rpoD* nucleotide sequence based tree and the *Aer* protein sequence based tree.

# Aer.g3

# gyrB/rpoB/rpoD

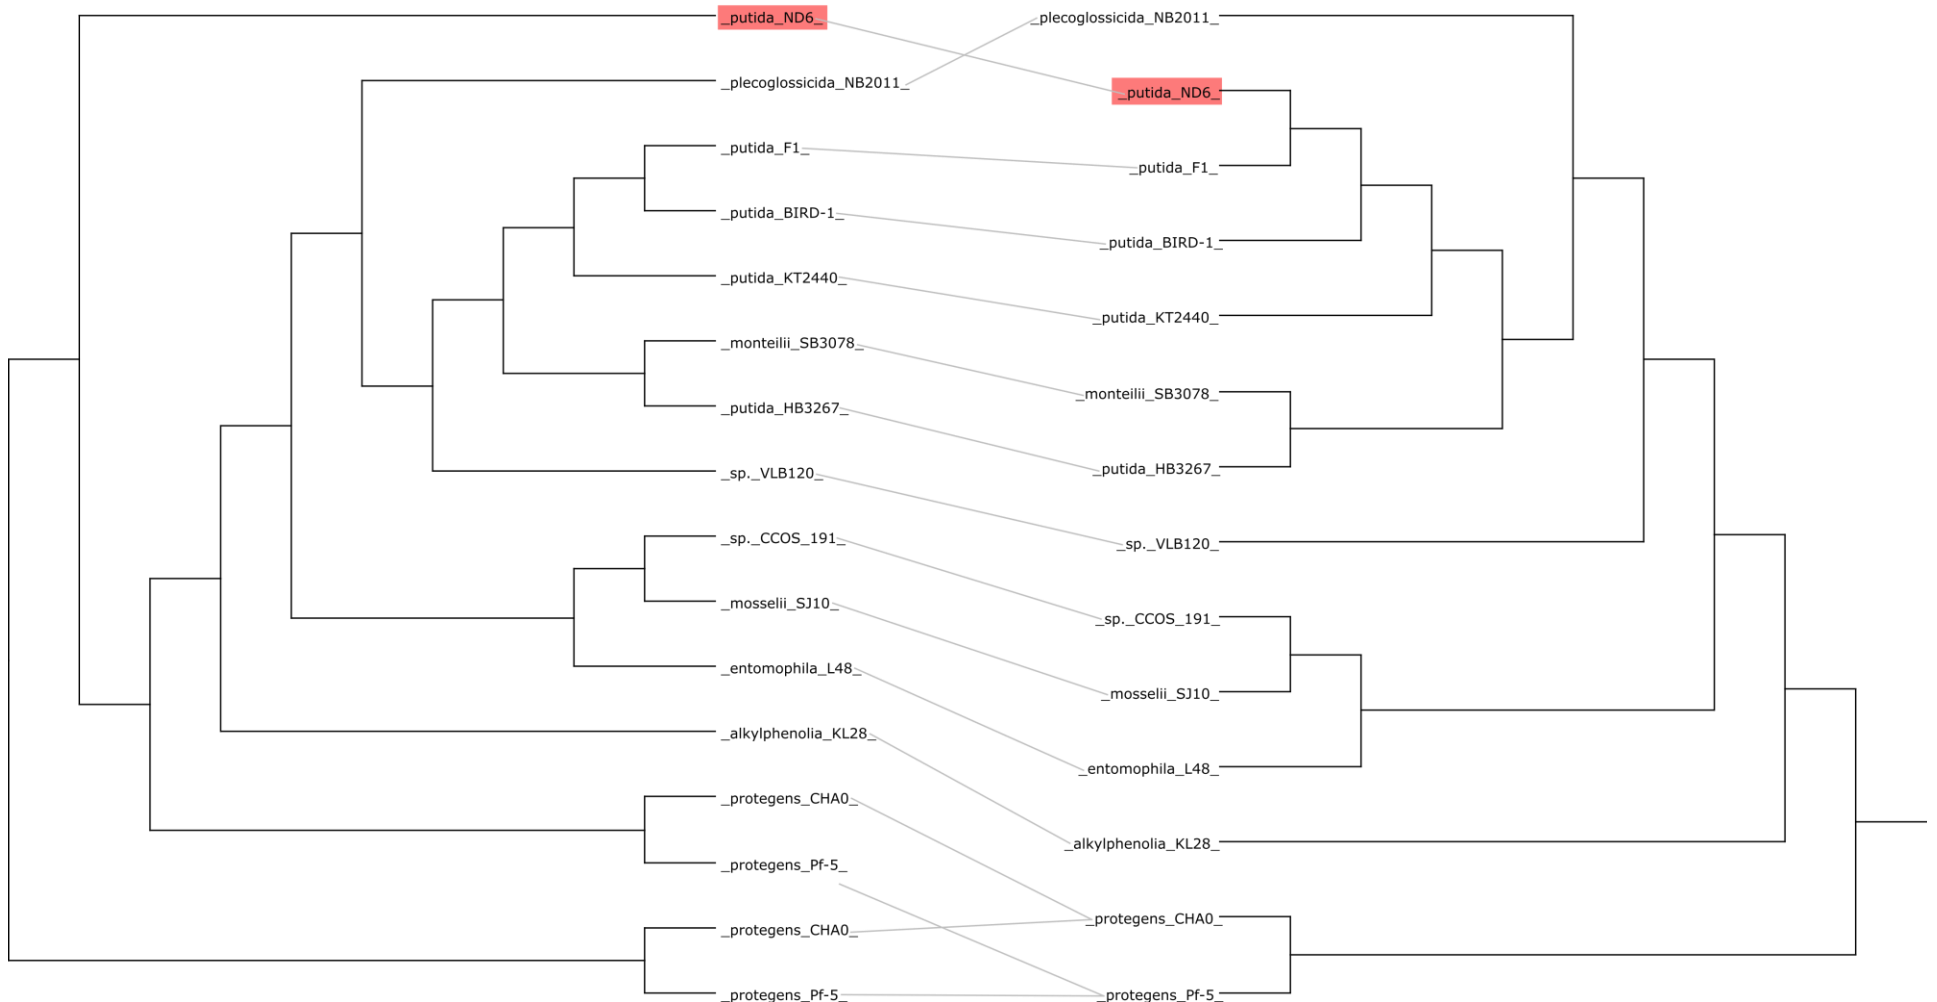

Supplementary Figure 8: Tanglegram showing tree matching between Aer.g3 subgroup tree and *Pseudomonas* genus phylogeny. Only species with a matching Aer sequence are included in the genus phylogeny. Matches highlighted in red indicate incongruity between the *gyrB/rpoB/rpoD* nucleotide sequence based tree and the Aer protein sequence based tree.

## Aer.g4

## gyrB/rpoB/rpoD

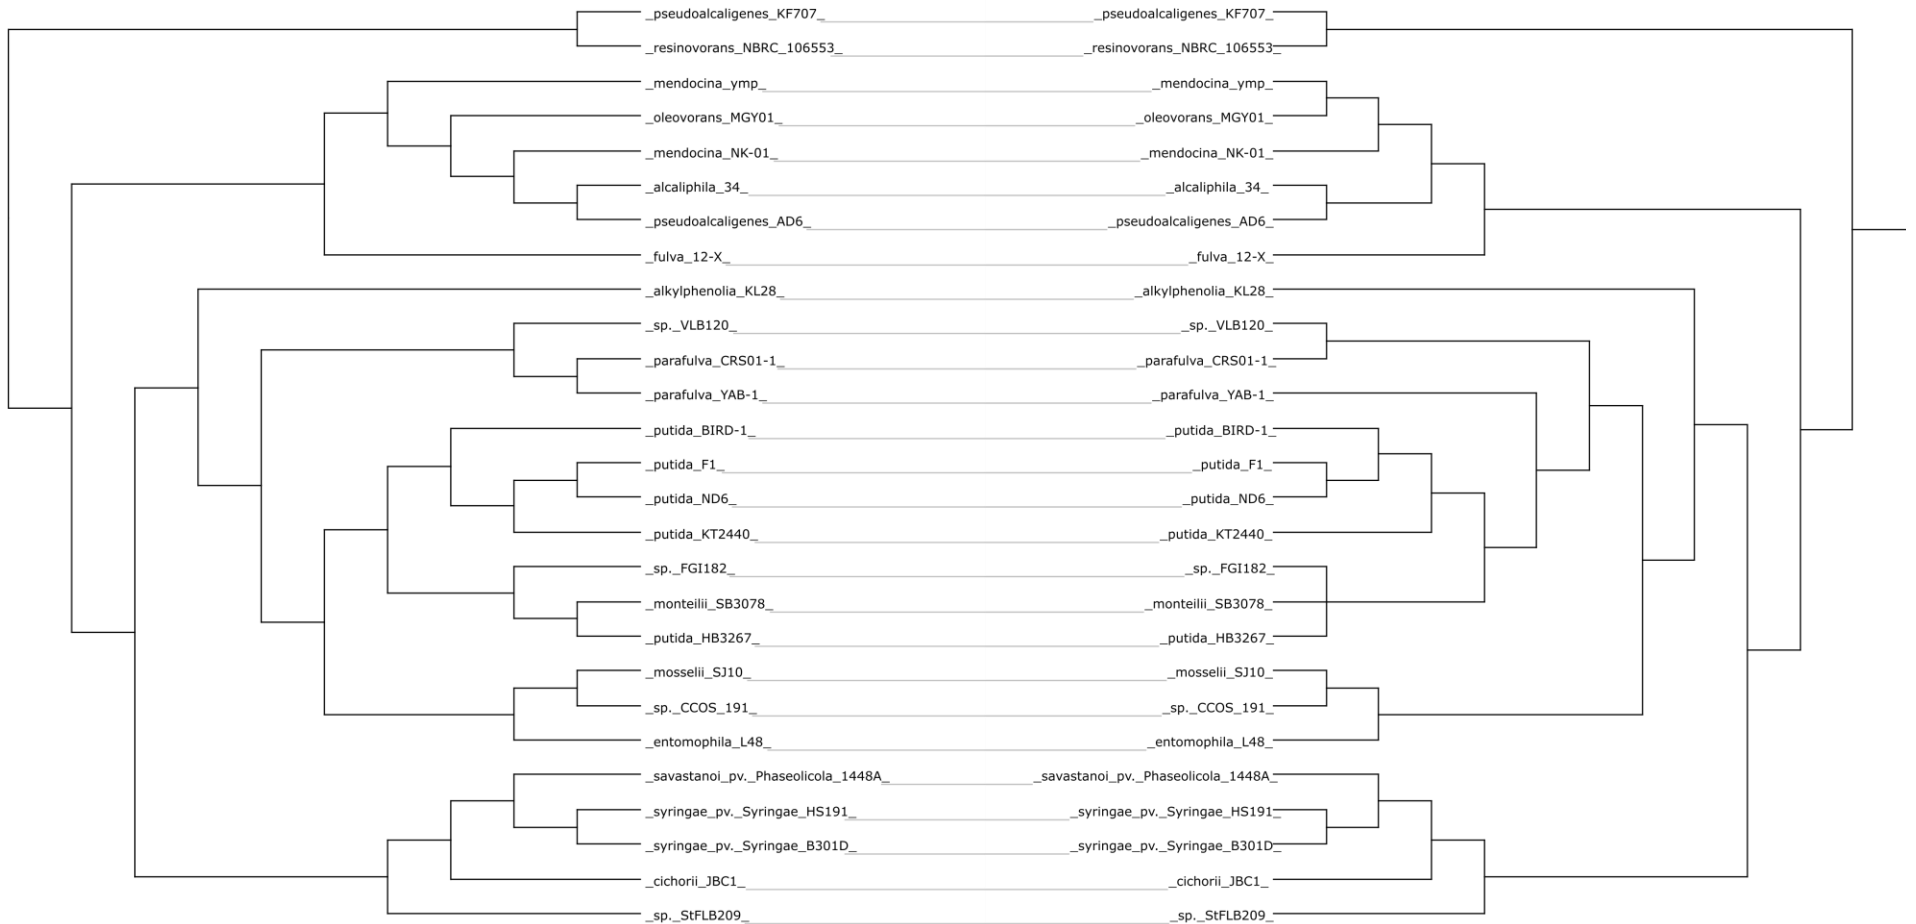

Supplementary Figure 9: Tanglegram showing tree matching between Aer.g1 subgroup tree and *Pseudomonas* genus phylogeny. Only species with a matching Aer sequence are included in the genus phylogeny. Matches highlighted in red indicate incongruity between the *gyrB/rpoB/rpoD* nucleotide sequence based tree and the Aer protein sequence based tree.

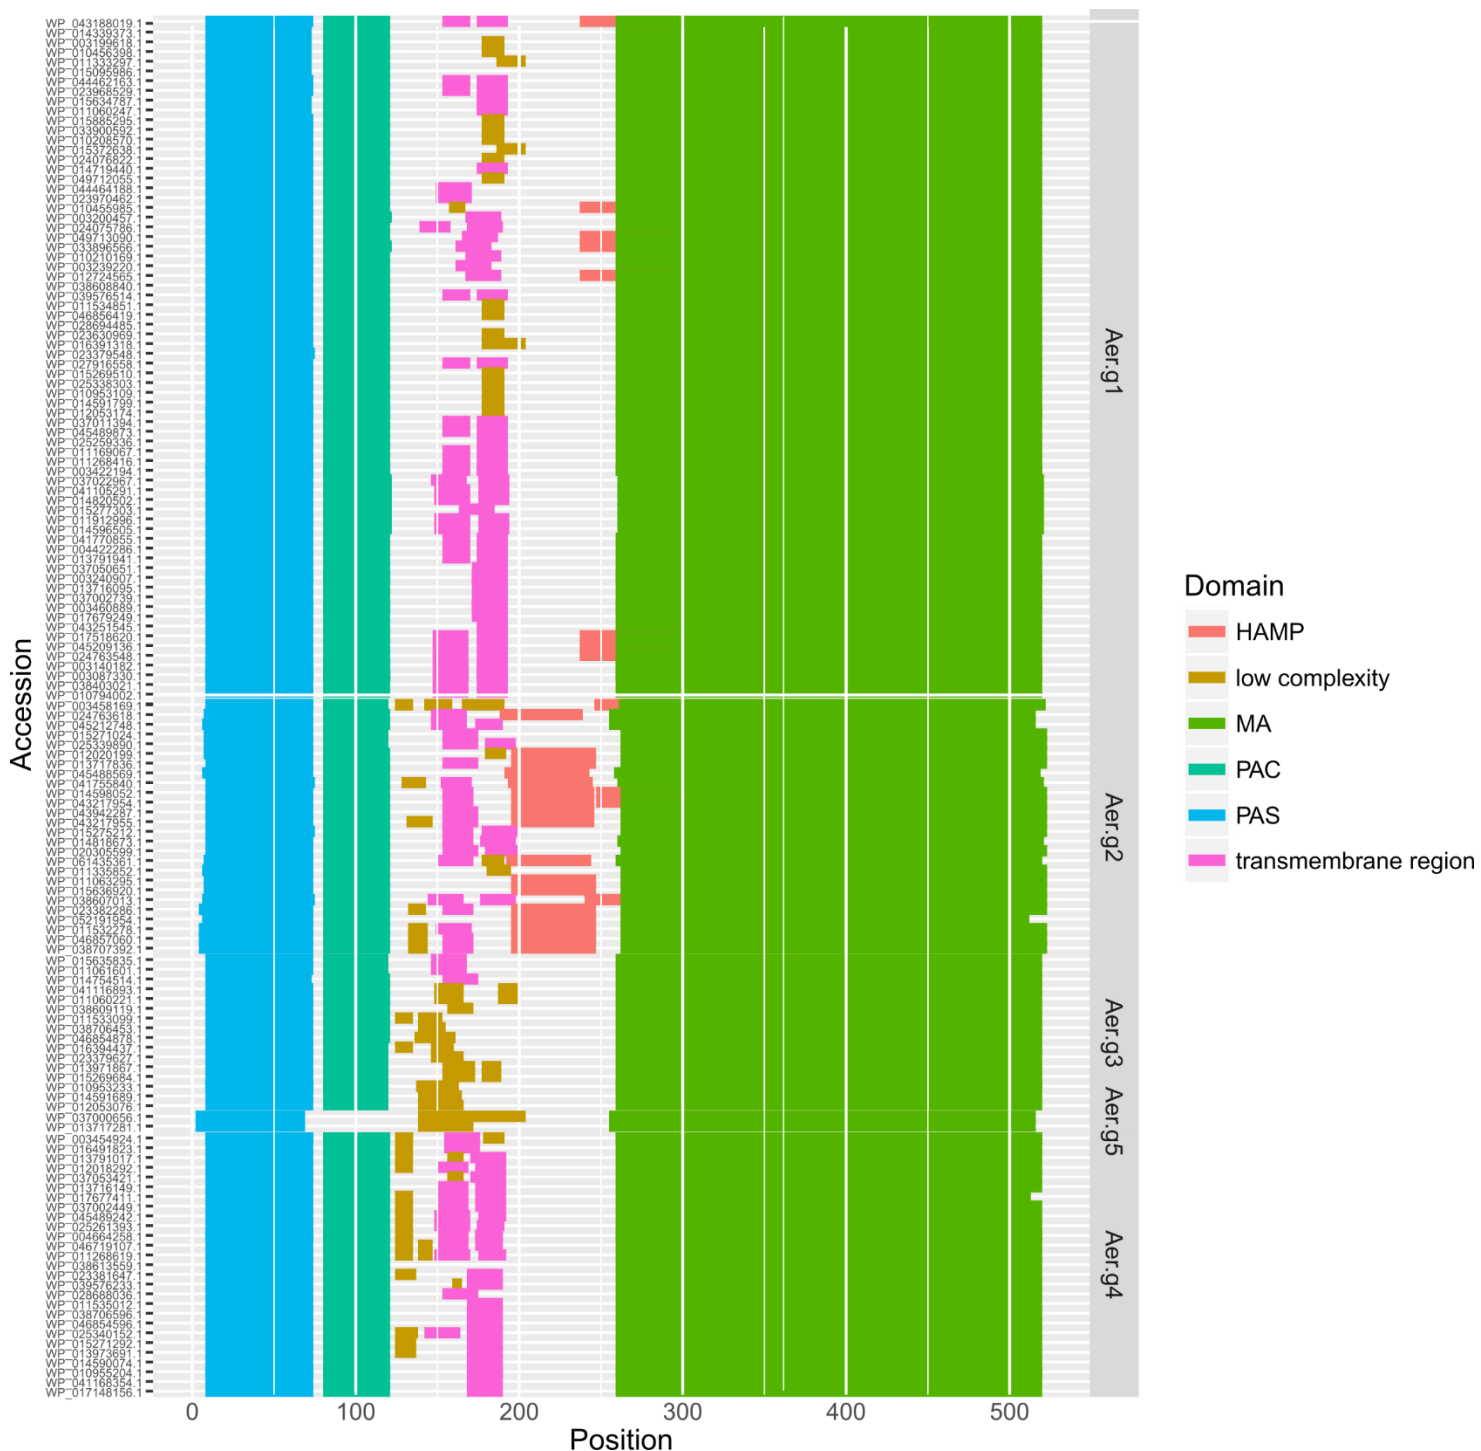

Supplementary Figure 10: Domain architecture of Aer sequences from select *Pseudomonas* species. Sequences were submitted to the SMART database and the results collected (1). Domain start and end positions were used to mark coloured bars: PAS (Pern/Art/Sin, blue); PAC (PAS associated domain, teal); transmembrane region (pink); HAMP (Histidine kinase/adenyl cyclases/methyl-accepting chemotaxis proteins/phosphatases, red); MA (methyl-accepting, green); low-complexity (brown). The methyl-accepting domain is also called the kinase control module or CheW/CheA interface.

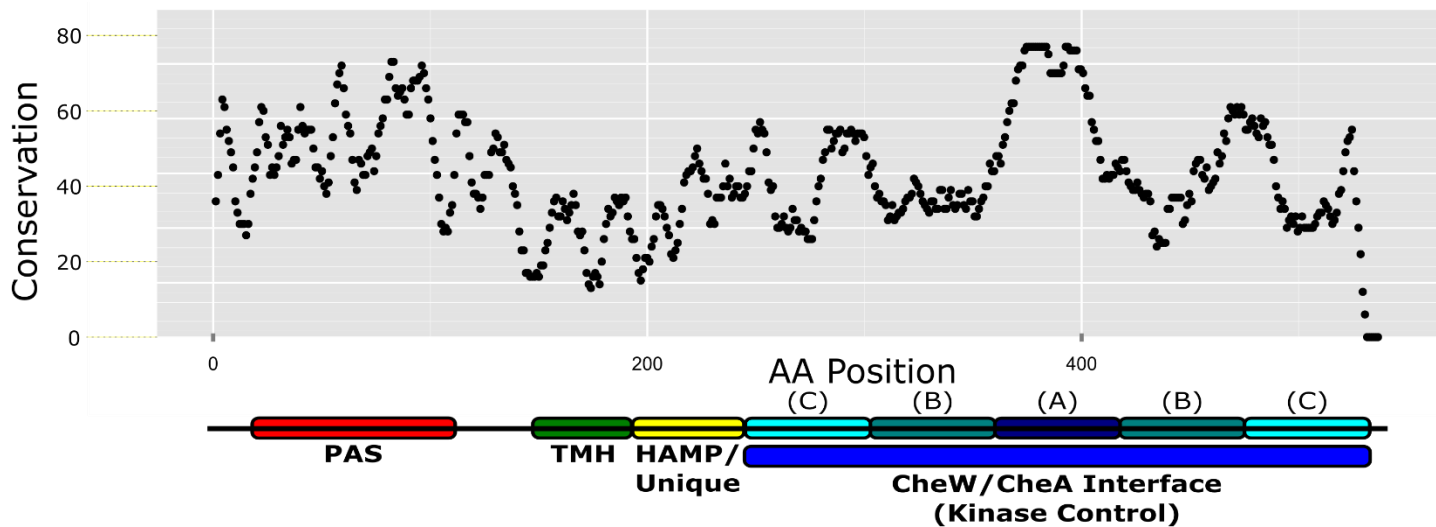

Supplementary Figure 11: Aer domain architecture and conservation across the entire length of all Aer sequences. Values were smoothed by taking the average of a position and the 3 preceding and following positions. Domains are PAS (Pern/Art/Sin) ligand binding (red), TMH (transmembrane helices, green), HAMP/Unique (in Aer.g2 HAMP, unique domains in other groups, yellow), CheW/CheA Interface also called Kinase Control (subdivided into A, signaling, dark blue; B, flexible bundle, teal; C, methylation, cyan).

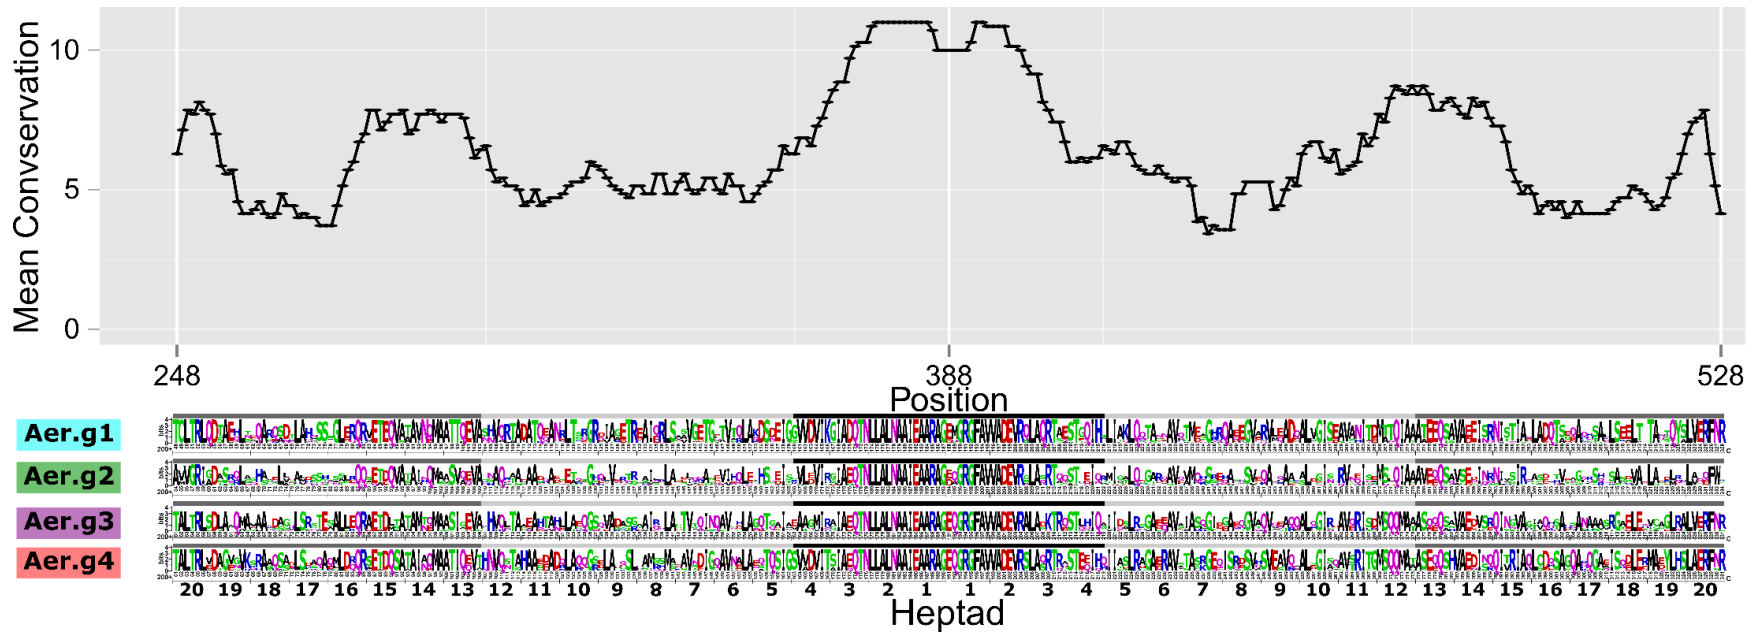

Supplementary Figure 12: Amino acid conservation of the cytoplasmic domain of Aer for all intergroup comparisons, and weblogs for each group. Conservation values were smoothed by taking the average of a position and the 3 preceding and following positions. The cytoplasmic domain is divided into 20 heptads, starting from the central glutamate counting outwards in each direction. Shading above the weblogs indicates the region (heptads 1-4, signaling; heptads 5-12, flexible bundle; heptads 13-20, methylation).



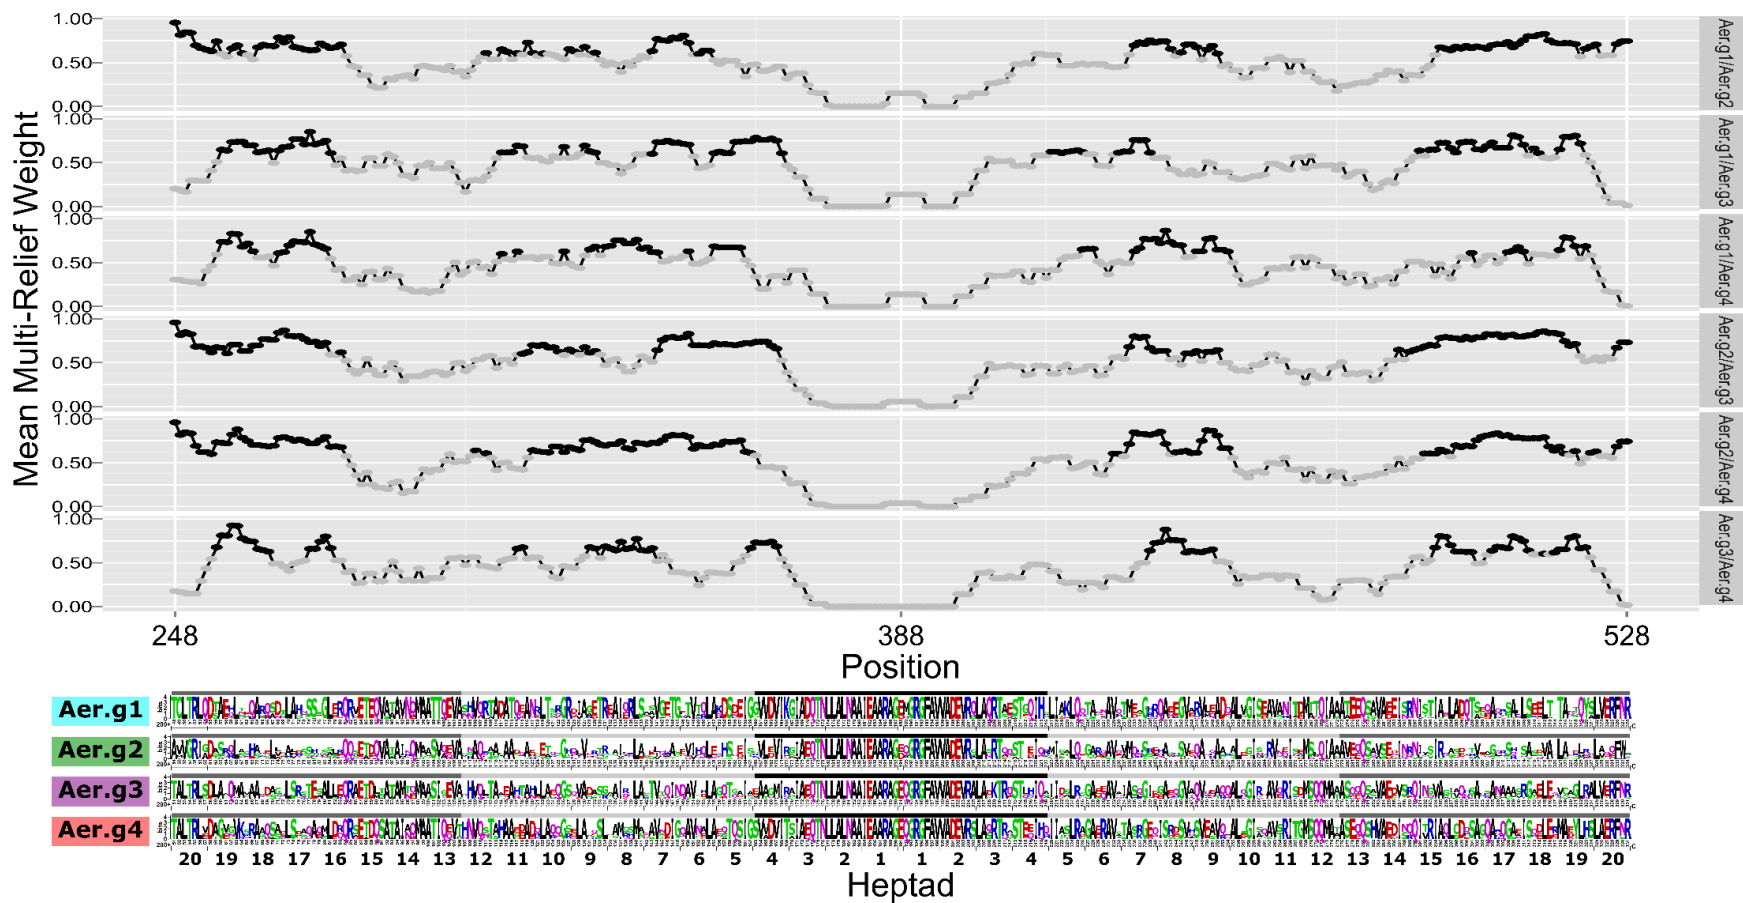

Supplementary Figure 13: Multi-relief scores of the cytoplasmic domain of Aer for all intergroup comparisons, and weblogs for each group. Multi-relief weight values were smoothed by taking the average of a position and the 3 preceding and following positions. Black points are above 0.6, grey below. The cutoff of 0.8 was relaxed due to the smoothing. Black regions indicate group unique regions. The cytoplasmic domain is divided into 20 heptads, starting from the central glutamate counting outwards in each direction. Shading above the weblogs indicates the region (heptads 1-4, signaling; heptads 5-12, flexible bundle; heptads 13-20, methylation).

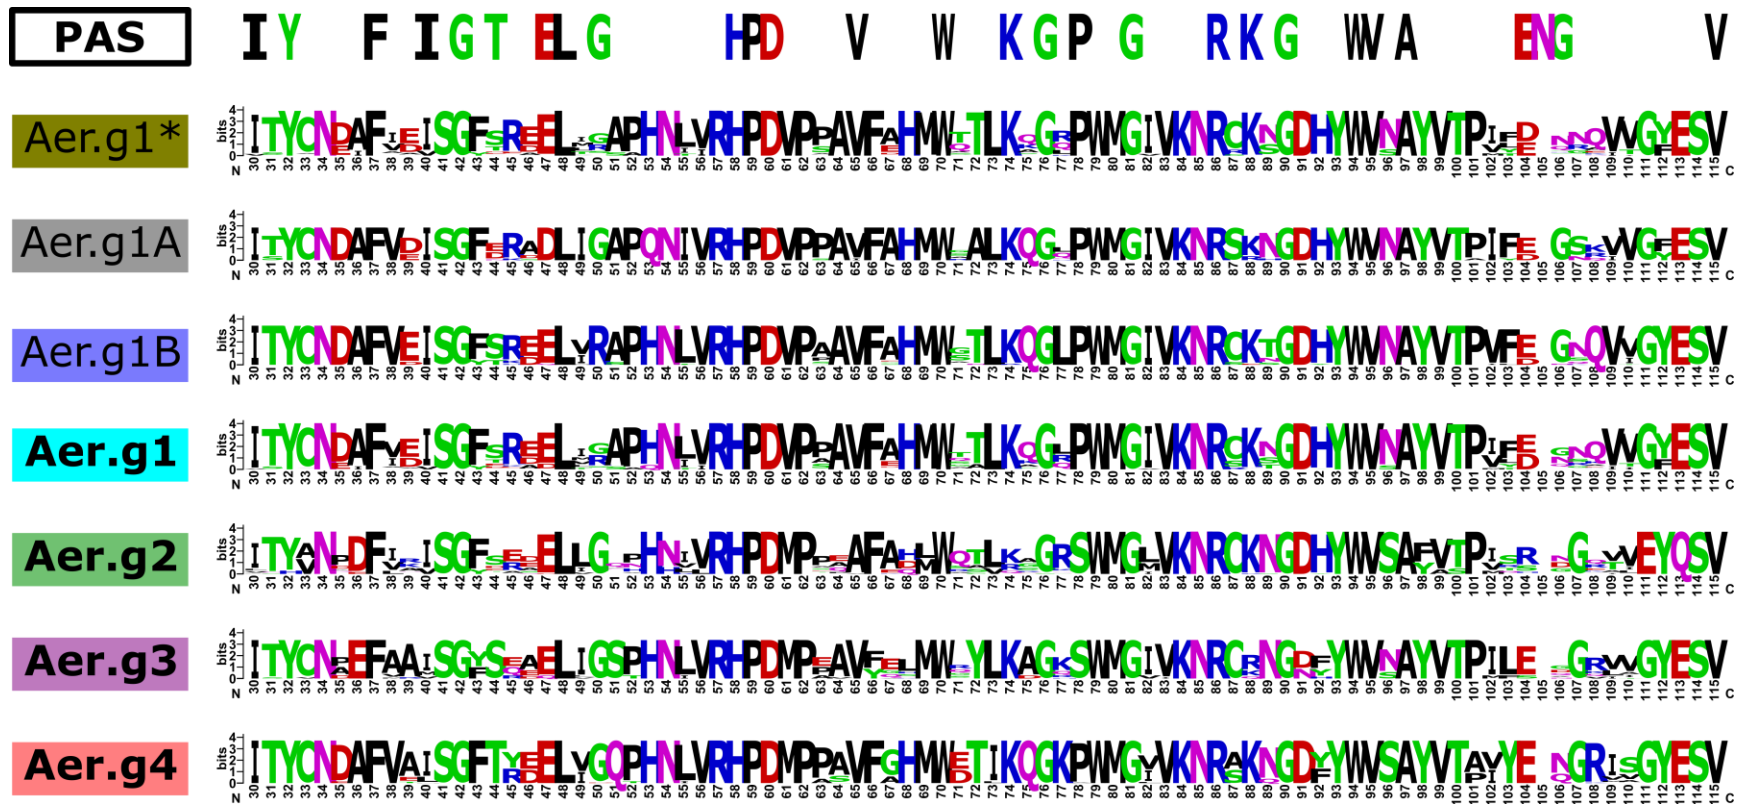

Supplementary Figure 14: Weblogs of each Aer group's PAS domain. Aer.g1\* indicates Aer.g1 sequences not including Aer.g1A and Aer.g1B. Aer.g1 includes all Aer.g1 sequences including Aer.g1A and Aer.g1B. Characteristic PAS domain residues were obtained from the SMART database.

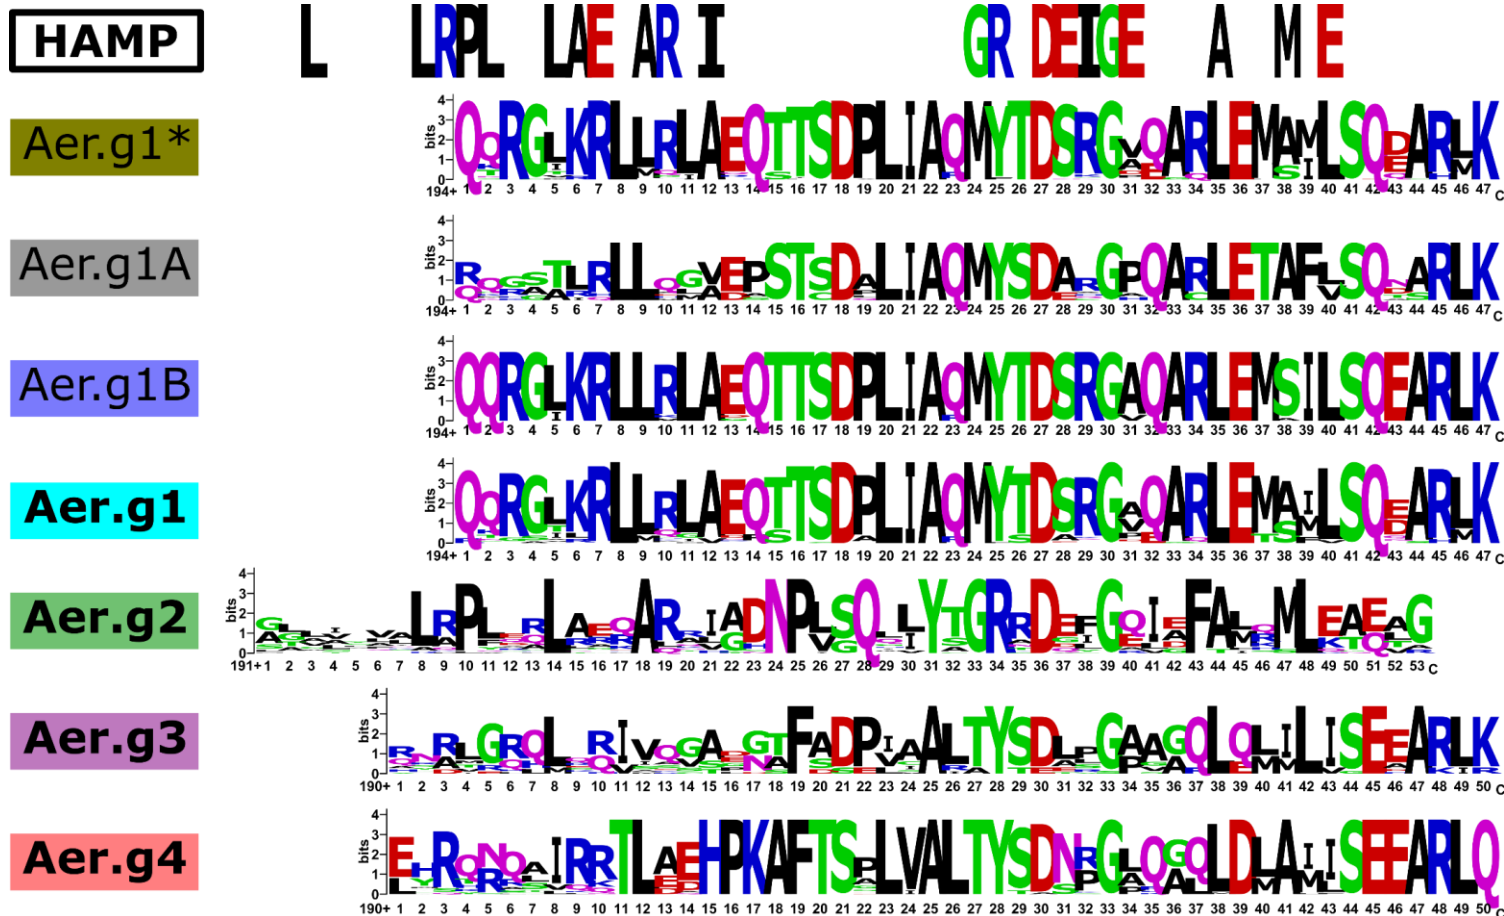

Supplementary Figure 15: Weblogos of Aer group specific region in between end of transmembrane domain and start of cytoplasmic domain heptads. Start of cytoplasmic domain was based on the number of matching heptads on either side of the central glutamate residue (Aer.g1, 388; Aer.g2 394; Aer.g3, 394; Aer.g4 391). The end of the transmembrane domain was determined by submitting the consensus sequence of each group to THMMR. Weblogos were aligned based on the shared aspartate residue (Aer.g1, 221; Aer.g2 227; Aer.g3, 220; Aer.g4 220). Characteristic HAMP domain residues were obtained from the SMART database. This figure is the same as Figure 5, only it includes the Aer.g1 subdivisions. Aer.g1\* indicates Aer.g1 sequences not including Aer.g1A and Aer.g1B. Aer.g1 includes all Aer.g1 sequences including Aer.g1A and Aer.g1B. This figure is equivalent to Figure 5, but includes the subdivisions of Aer.g1.

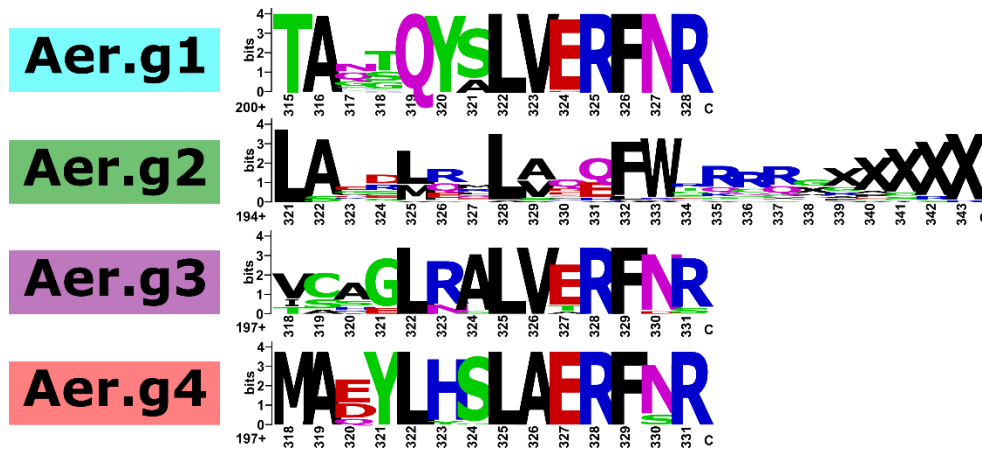

Supplementary Figure 16: Weblogos of Aer C-terminal region. Except for Aer.g2, this constitutes a zoomed in region shown in Supplementary Figure 12. X denotes NO amino acid in that position.

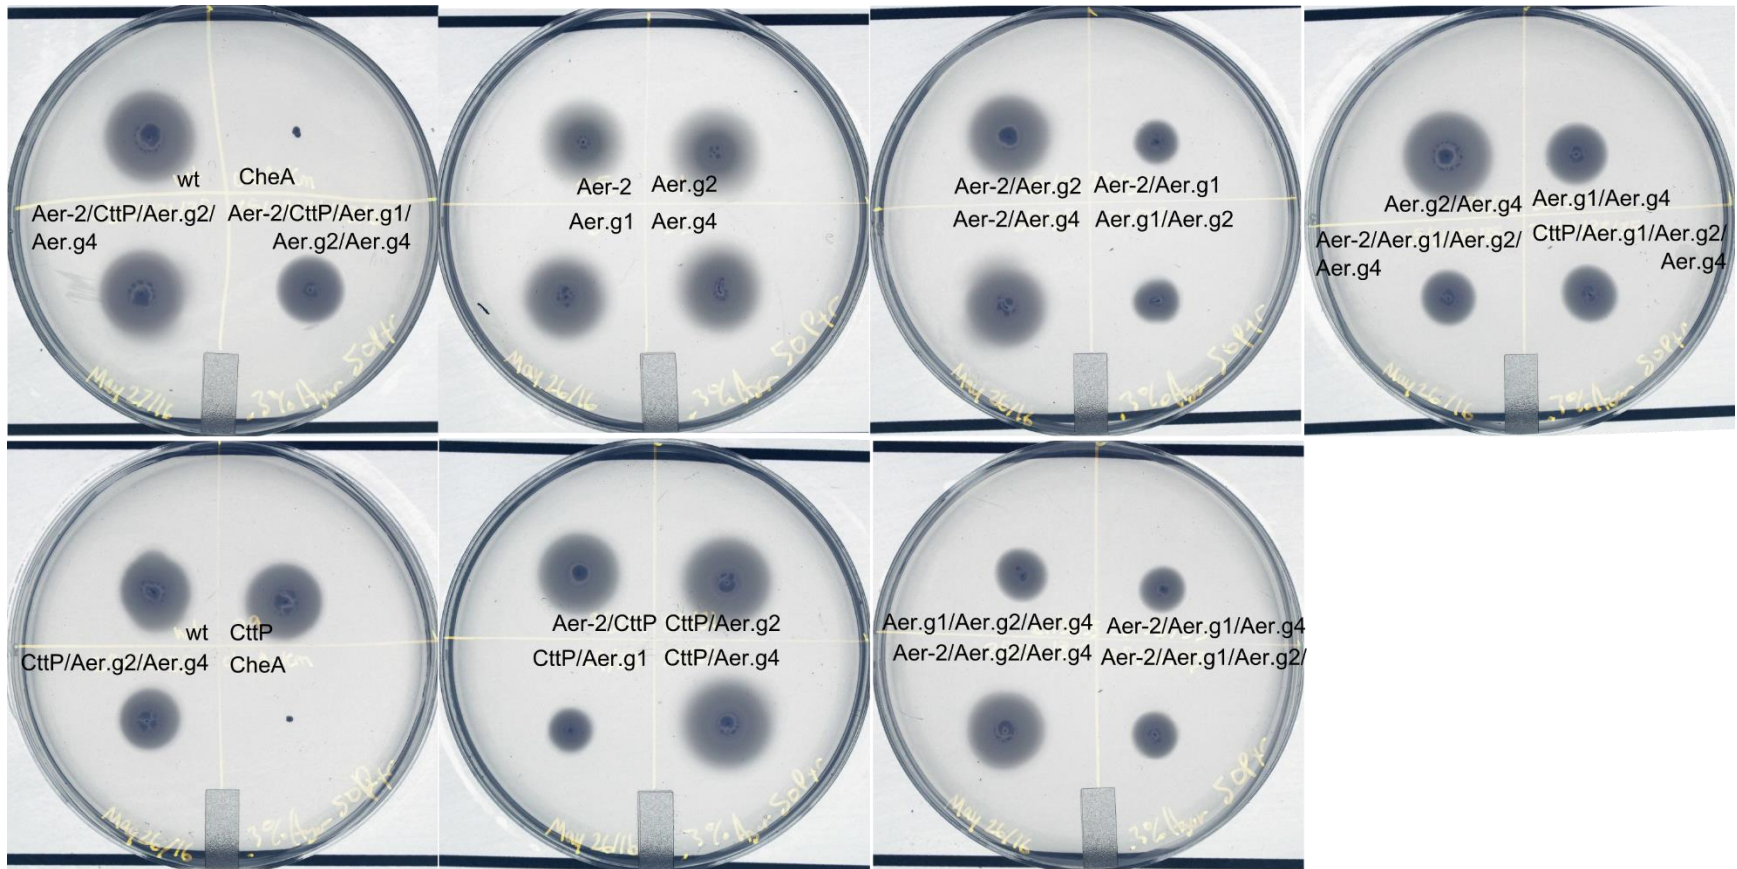

Supplementary Figure 17: Photographs of energy-taxis swim plates of *P. pseudoalcaligenes* strains with deletions in *aer-2*, *cttP* and *aer* homologs after 24h growth at 30°C in 50mM pyruvate. Colours have been inverted to emphasize contrast.



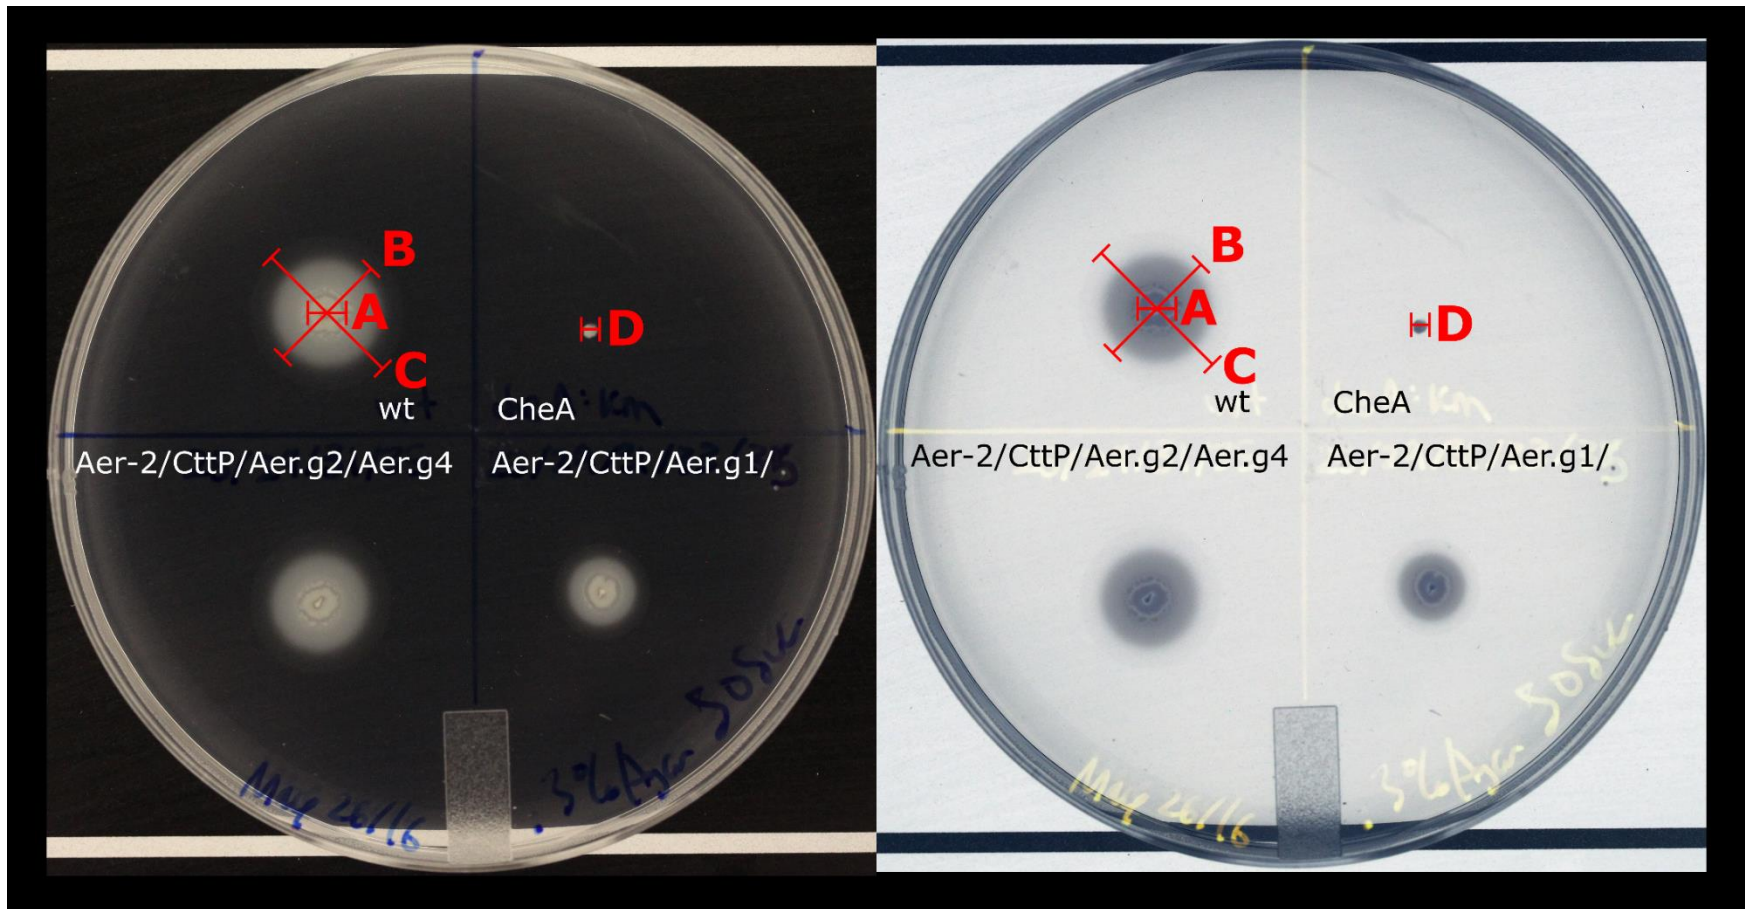

Supplementary Figure 18: Diagram showing how energy-taxis phenotypes were measured. Left is the actual image, right is the same image with colours inverted. This example plate shows the growth of 4 strains after 24h in minimal salts medium, 0.3% agar, 50mM succinate. Strains were inoculated into the plate on a sterile needle. Three different horizons are visible: the edge of dense growth (A), the intermediate colony edge (B), the edge of swimming cells (C). In the CheA mutant, there is no separation of horizons as the strain is non chemotactic (D). The diameter as defined by C that crossed through the inoculation center was used to measure the energy taxis diameter discussed in further figures.

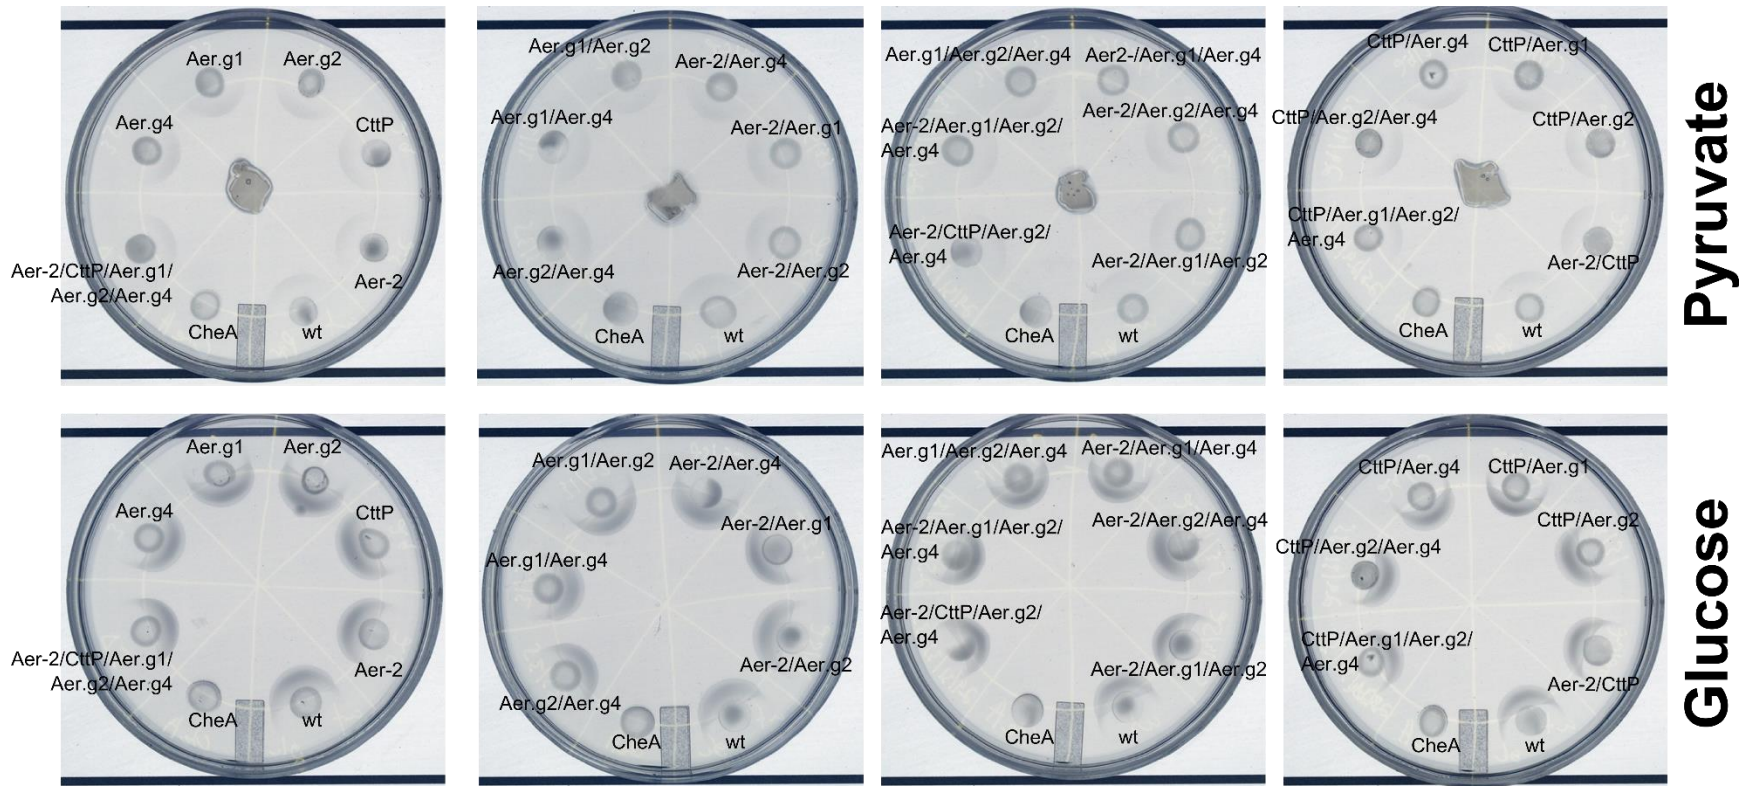

Supplementary Figure 19: Chemotaxis swim assays of *P. pseudoalcaligenes* strains with deletions in *aer-2*, *cttP* and *aer* homologs. Strains were grown overnight, concentrated then spotted on minimal salts plates containing 0.3% agar. Either 50mM pyruvate in 1.5% agar or crystals of glucose were placed in the centre of the plates. Photographs were taken after 24h. Colours have been inverted to emphasize contrast.

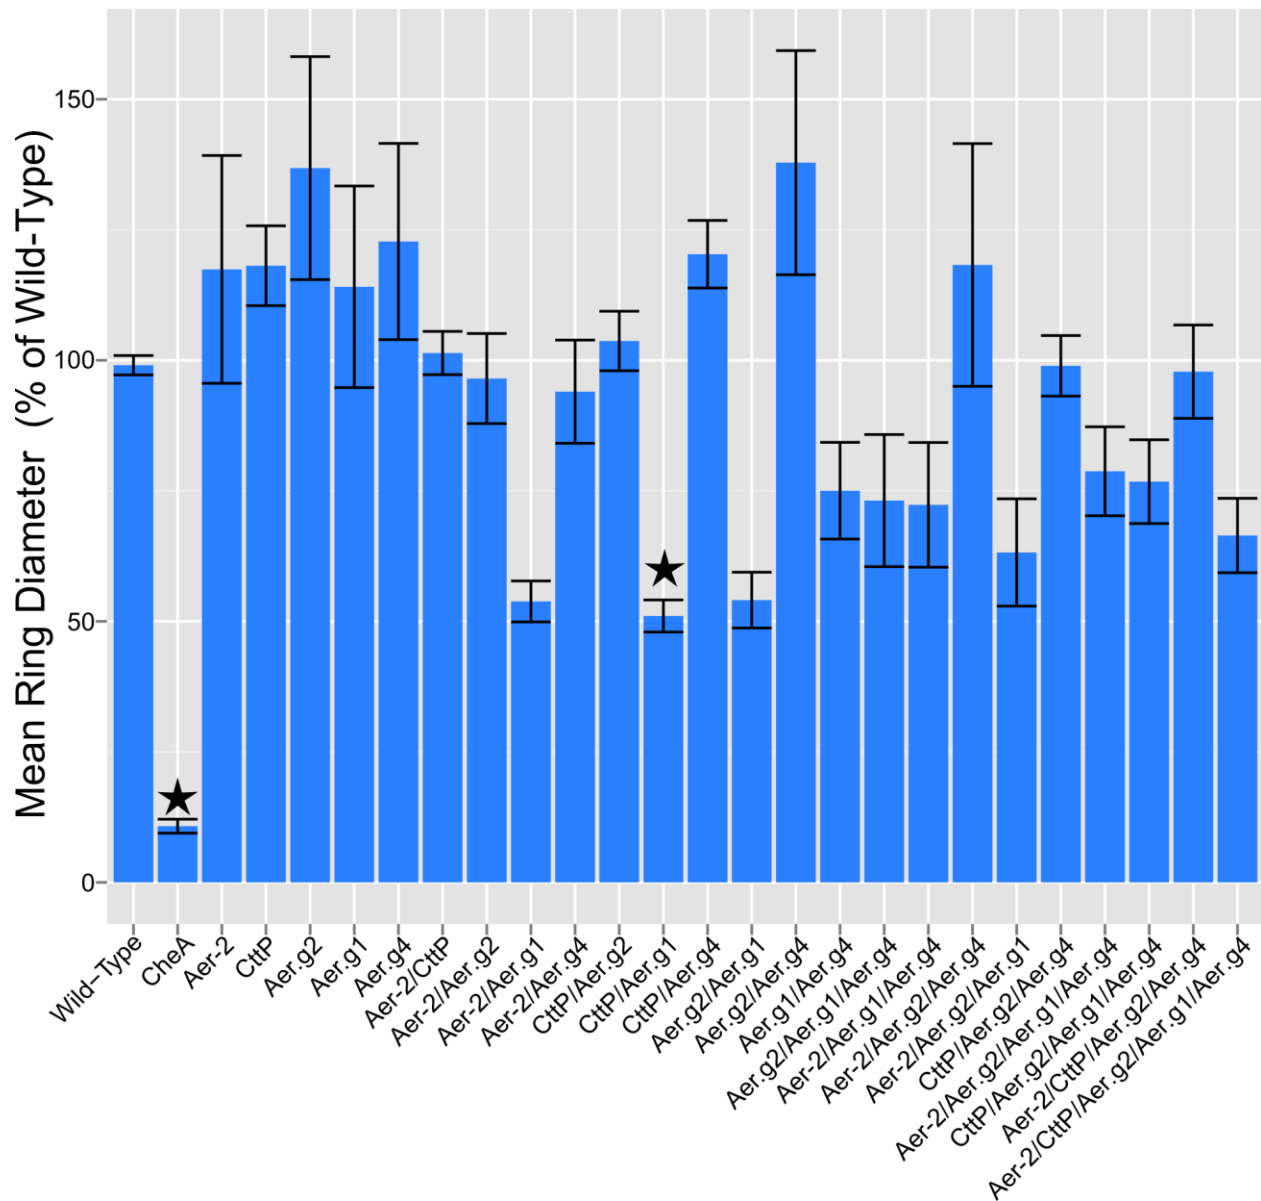

Supplementary Figure 20: Normalized energy-taxis growth diameters in 50mM succinate of strains of *P. pseudoalcaligenes* KF707 with deletions of *aer-2*, *cttP* and *aer* homologs. Bars indicate the average growth diameter, normalized to the wild-type, at both 24h and 48h from at least 3 experimental replicates. Wild-type strains were normalized to the mean of technical replicates within each experiment. Error bars indicate standard error. Stars indicate significant differences from the wild-type based on Tukey's Honest Significant Differences test with a confidence value of 0.95. The *cheA::KmR* mutant was not grown with antibiotic present.



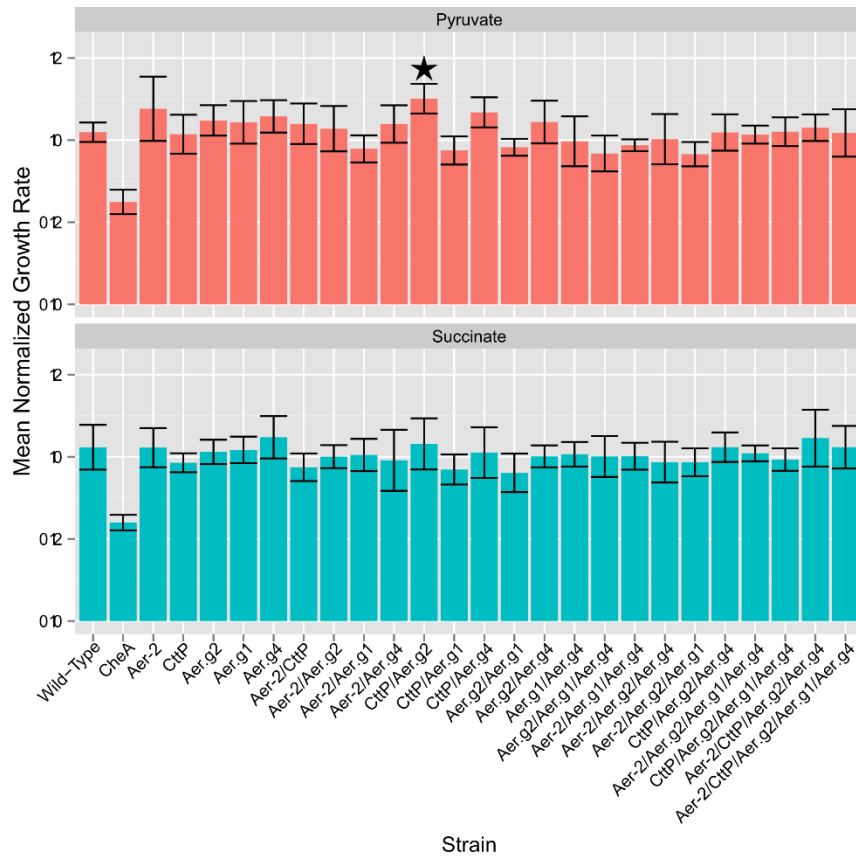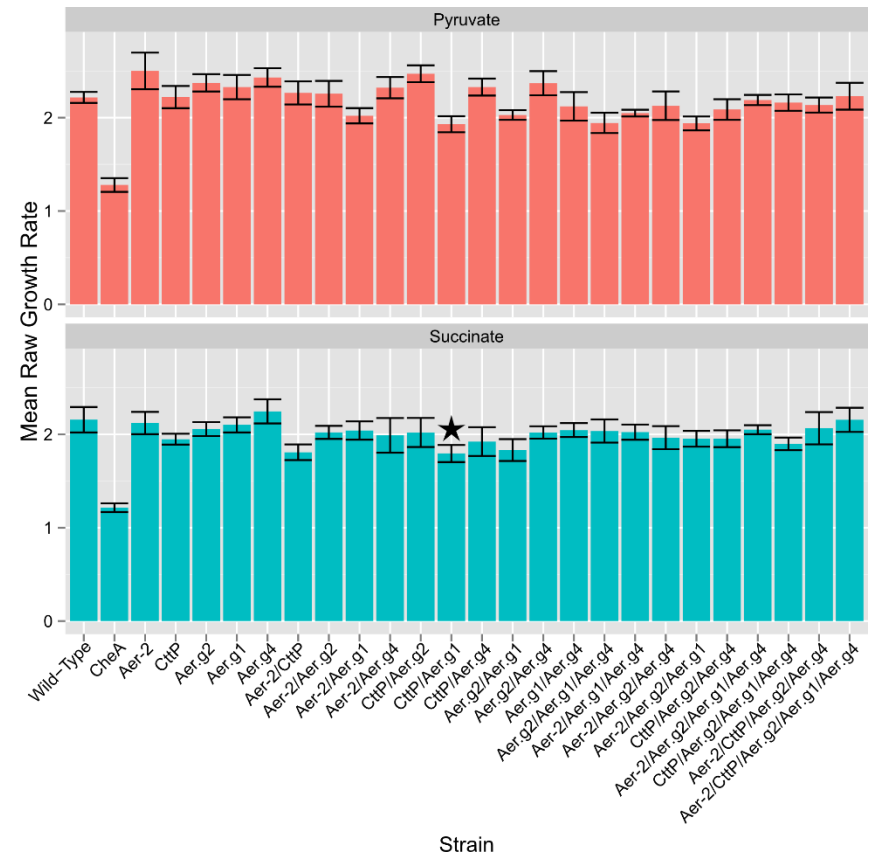

Supplementary Figure 21: Mean raw and normalized growth rates of energy-taxis swim-diameters of strains of *P. pseudoalcaligenes* KF707 with deletions of *aer-2*, *cttP* and *aer* homologs. Growth rates were calculated by dividing the diameter at 48h by the diameter at 24h. Normalized rates were calculated from diameters that were normalized to the wild-type for each experiment at each time point. Stars indicate significant differences from the corresponding wild-type according to Tukey's Honest Significant Differences test. Values represent results from at least 3 experimental replicates.

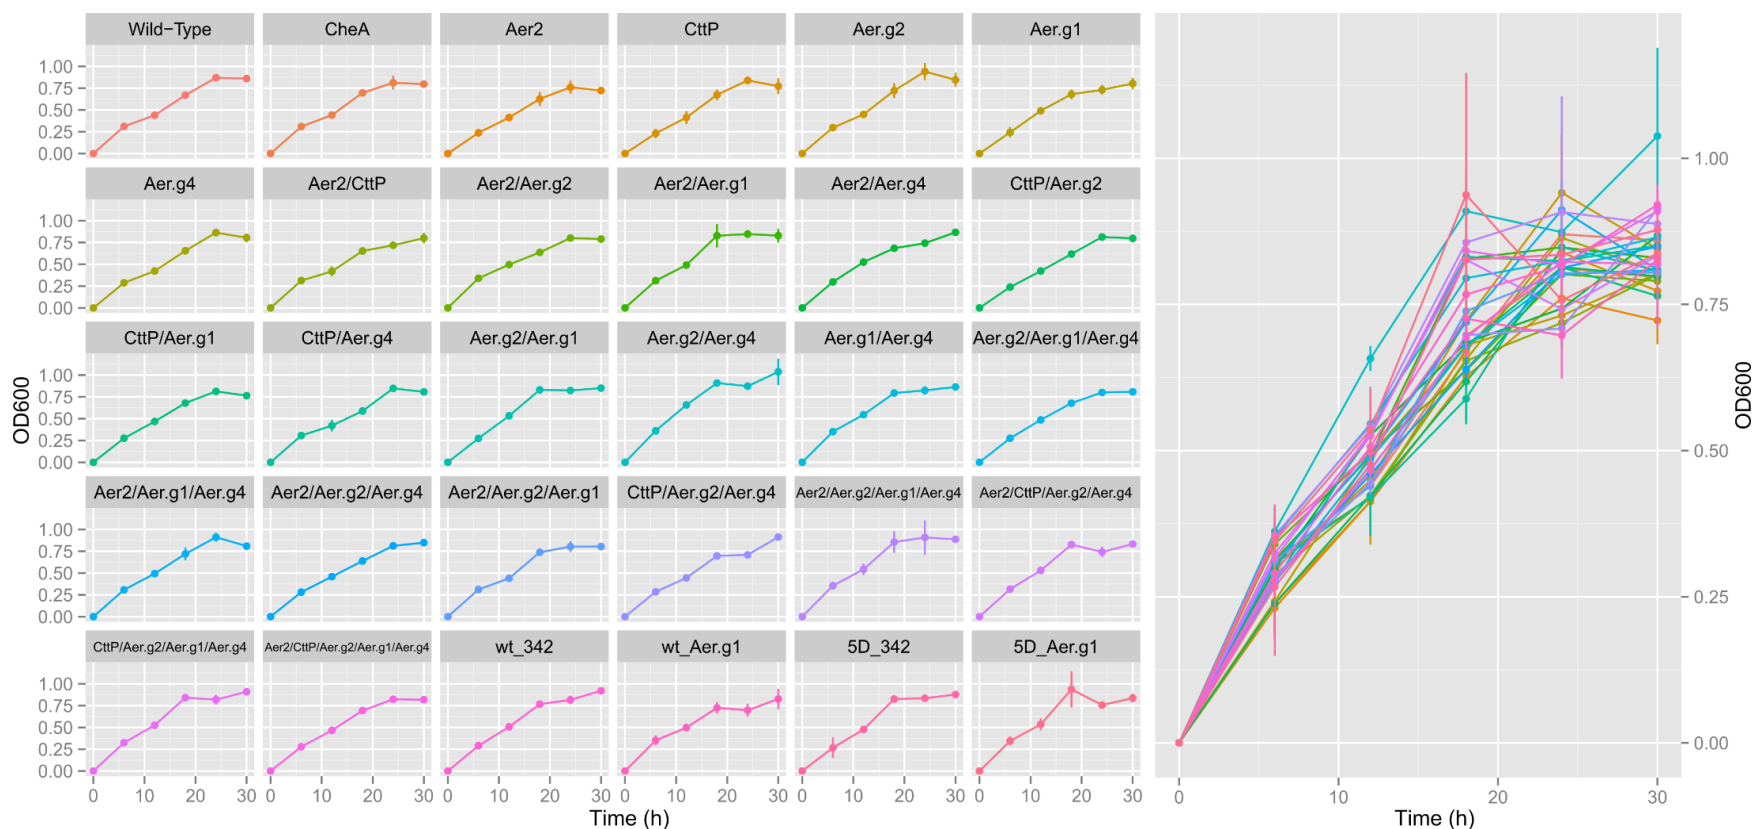

Supplementary Figure 22: Growth *P. pseudoalcaligenes* KF707 strains with deletions of Aer homologs, CttP and Aer-2. Growth was performed in a microtiter plate in minimal salts medium with 10mM pyruvate as the growth substrate. Growth of the wild-type and quintuple mutant (Aer2/CttP/Aer.g1/Aer.g2/Aer.g4) with the empty vector pSEVA342 and pSEVA342\_Aer.g1 was also assayed. Values represent the average of 2 biological replicates from 2 experimental replicates (4 total replicates). Lines at points indicates standard error.

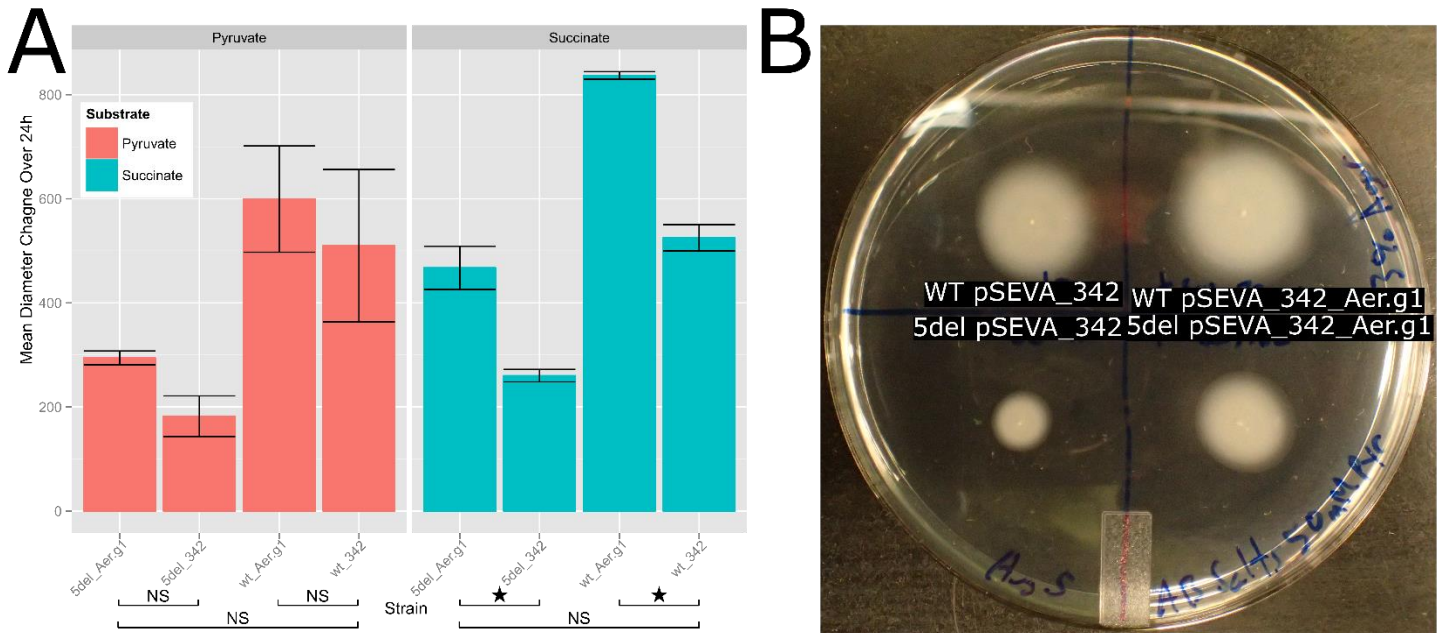

Supplementary Figure 23: Mean change of energy-taxis diameters over 24h of strains of *P. pseudoalcaligenes* KF707 wild-type and quintuple mutant strains carrying *Aer.g1* complementation plasmids. Change is the difference between 24h and 48h (A). Stars indicate significant differences according to Tukey's Honest Significant Differences test. Values represent results from 2 experimental replicates. Strains were carrying either pSEVA\_342 (empty vector control) or p\_SEVA\_342 with *Aer.g1*. 5del indicates quintuple mutant with deletion of *Aer2/CttP/Aer.g2/Aer.g1/Aer.g4*. Photograph in bottom right was taken after 24h of growth (B).

Supplementary Table 1: Genes immediately adjacent to *aer* genes and presence of mobile elements. See supplementary data.

Supplementary Table 2: Frequency of association of mobile elements within 5kb of *aer* genes. Summarized from supplementary Table 1.

| Aer Group | Repeats | Transposase | Integrase |
|-----------|---------|-------------|-----------|
| aer.g1    | 20/73   | 2/73        | 0/73      |
| aer.g2    | 4/26    | 1/26        | 0/26      |
| aer.g3    | 1/16    | 1/16        | 1/16      |
| aer.g4    | 4/27    | 2/27        | 1/27      |
| aer.g5    | 0/2     | 0/2         | 0/2       |
| Total     | 29/144  | 6/144       | 2/144     |

Supplementary Table 3: Tukey Honest Significant Differences results comparing differences in normalized energy-taxis diameter in pyruvate or succinate plates. HSD test compared all pairs of strains, only comparisons to the wild-type are presented here. P values were computed using a 0.95 confidence value, those below 0.05 were taken as significant.

| Comparison                               | Pyruvate Difference | Pyruvate Adjusted p Value | Succinate Difference | Succinate Adjusted p Value |
|------------------------------------------|---------------------|---------------------------|----------------------|----------------------------|
| Wild-Type-Aer.g1                         | 0.044557106         | 1                         | -0.15022             | 1                          |
| Wild-Type-Aer.g1/Aer.g4                  | 0.316929667         | <b>0.001584542</b>        | 0.240355             | 0.995568                   |
| Wild-Type-Aer.g2                         | -<br>0.130260185    | 0.994474052               | -0.37755             | 0.470077                   |
| Wild-Type-Aer.g2/Aer.g1                  | 0.416623963         | <b>6.99E-07</b>           | 0.449853             | 0.123956                   |
| Wild-Type-Aer.g2/Aer.g1/Aer.g4           | 0.41531338          | <b>7.83E-07</b>           | 0.259256             | 0.985363                   |
| Wild-Type-Aer.g2/Aer.g4                  | -<br>0.107657177    | 0.999855723               | -0.38801             | 0.404151                   |
| Wild-Type-Aer.g4                         | -<br>0.080272111    | 0.999999891               | -0.23695             | 0.996521                   |
| Wild-Type-Aer2                           | 0.06079056          | 1                         | -0.18355             | 0.99998                    |
| Wild-Type-Aer2/Aer.g1                    | 0.423034811         | <b>3.99E-07</b>           | 0.452405             | 0.116907                   |
| Wild-Type-Aer2/Aer.g1/Aer.g4             | 0.348397359         | 0.000171831               | 0.267403             | 0.977193                   |
| Wild-Type-Aer2/Aer.g2                    | -<br>0.028743339    | 1                         | 0.025494             | 1                          |
| Wild-Type-Aer2/Aer.g2/Aer.g1             | 0.424269068         | <b>3.58E-07</b>           | 0.35864              | 0.594415                   |
| Wild-Type-Aer2/Aer.g2/Aer.g1/Aer.g4      | 0.358356796         | <b>8.13E-05</b>           | 0.203102             | 0.999816                   |
| Wild-Type-Aer2/Aer.g2/Aer.g4             | 0.172011243         | 0.810645941               | -0.19209             | 0.999944                   |
| Wild-Type-Aer2/Aer.g4                    | 0.00831534          | 1                         | 0.050637             | 1                          |
| Wild-Type-Aer2/CttP                      | -0.05951297         | 0.999999999               | -0.02338             | 1                          |
| Wild-Type-Aer2/CttP/Aer.g2/Aer.g1/Aer.g4 | 0.396996279         | 3.72E-06                  | 0.326159             | 0.792546                   |
| Wild-Type-Aer2/CttP/Aer.g2/Aer.g4        | 0.063072257         | 0.999999997               | 0.012354             | 1                          |
| Wild-Type-CheA                           | 0.87948192          | 0                         | 0.88287              | <b>3.16E-10</b>            |
| Wild-Type-CttP                           | -<br>0.139877304    | 0.983128982               | -0.19063             | 0.999953                   |
| Wild-Type-CttP/Aer.g1                    | 0.459331863         | <b>4.31E-11</b>           | 0.480318             | <b>0.011177</b>            |
| Wild-Type-CttP/Aer.g2                    | -<br>0.025195491    | 1                         | -0.04643             | 1                          |
| Wild-Type-CttP/Aer.g2/Aer.g1/Aer.g4      | 0.38554092          | <b>1.60E-07</b>           | 0.22296              | 0.991638                   |
| Wild-Type-CttP/Aer.g2/Aer.g4             | 0.015579387         | 1                         | 0.001138             | 1                          |
| Wild-Type-CttP/Aer.g4                    | -<br>0.145041436    | 0.935787346               | -0.21263             | 0.998431                   |

Supplementary Table 4: p values from Tukey HSD results comparing differences in raw and normalized energy-taxis diameter growth rates in pyruvate or succinate plates. Growth rates were obtained by dividing the raw or normalized diameter at 48h by the value at 24h. HSD test compared all pairs of strains, only comparisons to the wild-type are presented here. P values were computed using a 0.95 confidence value, those below 0.05 were taken as significant.

| Comparison                               | Pyruvate Normalized | Succinate Normalized | Pyruvate Raw | Succinate Raw   |
|------------------------------------------|---------------------|----------------------|--------------|-----------------|
| Wild-Type-Aer.g1                         | 1                   | 1                    | 1            | 1               |
| Wild-Type-Aer.g1/Aer.g4                  | 1                   | 1                    | 1            | 1               |
| Wild-Type-Aer.g2                         | 1                   | 1                    | 0.999        | 1               |
| Wild-Type-Aer.g2/Aer.g1                  | 0.997992            | 0.194316             | 0.96148      | 0.37878         |
| Wild-Type-Aer.g2/Aer.g1/Aer.g4           | 0.826779            | 1                    | 0.332046     | 1               |
| Wild-Type-Aer.g2/Aer.g4                  | 1                   | 1                    | 0.999447     | 1               |
| Wild-Type-Aer.g4                         | 0.999305            | 0.999923             | 0.894703     | 0.999999        |
| Wild-Type-Aer2                           | 0.791526            | 1                    | 0.305462     | 1               |
| Wild-Type-Aer2/Aer.g1                    | 0.990515            | 1                    | 0.937616     | 1               |
| Wild-Type-Aer2/Aer.g1/Aer.g4             | 0.999856            | 1                    | 0.99263      | 1               |
| Wild-Type-Aer2/Aer.g2                    | 1                   | 1                    | 1            | 1               |
| Wild-Type-Aer2/Aer.g2/Aer.g1             | 0.776794            | 0.994759             | 0.290882     | 0.997895        |
| Wild-Type-Aer2/Aer.g2/Aer.g1/Aer.g4      | 1                   | 1                    | 1            | 1               |
| Wild-Type-Aer2/Aer.g2/Aer.g4             | 1                   | 0.995619             | 1            | 0.999439        |
| Wild-Type-Aer2/Aer.g4                    | 1                   | 0.99969              | 1            | 0.999984        |
| Wild-Type-Aer2/CttP                      | 1                   | 0.516674             | 1            | 0.066568        |
| Wild-Type-Aer2/CttP/Aer.g2/Aer.g1/Aer.g4 | 1                   | 1                    | 1            | 1               |
| Wild-Type-Aer2/CttP/Aer.g2/Aer.g4        | 1                   | 0.999829             | 1            | 1               |
| Wild-Type-CheA                           | <b>0</b>            | <b>0</b>             | <b>0</b>     | <b>0</b>        |
| Wild-Type-CttP                           | 1                   | 0.990882             | 1            | 0.996631        |
| Wild-Type-CttP/Aer.g1                    | 0.866421            | 0.259124             | 0.070324     | <b>0.039548</b> |
| Wild-Type-CttP/Aer.g2                    | <b>0.03075</b>      | 1                    | 0.416662     | 1               |
| Wild-Type-CttP/Aer.g2/Aer.g1/Aer.g4      | 1                   | 0.999082             | 1            | 0.712737        |
| Wild-Type-CttP/Aer.g2/Aer.g4             | 1                   | 1                    | 0.999329     | 0.986805        |
| Wild-Type-CttP/Aer.g4                    | 0.926885            | 1                    | 0.999998     | 0.939527        |

Supplementary Table 5: p values from Tukey HSD results comparing differences in energy-taxis diameters, diameter changes and diameter growth rates in pyruvate or succinate plates for complementation strains. 5del indicates deletion of Aer2/CttP/Aer.g2/Aer.g1/Aer.g4. Growth rates were obtained by dividing the raw or normalized diameter at 48h by the value at 24h. Amount of growth was obtained by subtracting the 24h diameter from the value at 48h. HSD test compared all pairs of strains. P values were computed using a 0.95 confidence value, those below 0.05 were taken as significant (bold).

| Parameter | Time | Comparison            | Succinate Difference | Succinate Adjusted p Value | Pyruvate Difference | Pyruvate Adjusted p Value |
|-----------|------|-----------------------|----------------------|----------------------------|---------------------|---------------------------|
| Diameter  | 24   | 5del_342-5del_33      | -57.607              | 0.920                      | -59.515             | 0.644                     |
|           |      | wt_Aer.g1-5del_Aer.g1 | 254.831              | 0.157                      | 119.757             | 0.204                     |
|           |      | wt_342-5del_Aer.g1    | 149.687              | 0.463                      | 93.301              | 0.346                     |
|           |      | wt_Aer.g1-5del_342    | 312.438              | 0.089                      | 179.272             | 0.067                     |
|           |      | wt_342-5del_342       | 207.294              | 0.256                      | 152.816             | 0.108                     |
|           |      | wt_342-wt_Aer.g1      | -105.144             | 0.691                      | -26.456             | 0.943                     |
| Diameter  | 48   | 5del_342-5del_Aer.g1  | -264.812             | 0.196                      | -171.301            | 0.755                     |
|           |      | wt_Aer.g1-5del_Aer.g1 | 624.510              | <b>0.014</b>               | 425.043             | 0.199                     |
|           |      | wt_342-5del_Aer.g1    | 207.487              | 0.331                      | 309.349             | 0.382                     |
|           |      | wt_Aer.g1-5del_342    | 889.321              | <b>0.004</b>               | 596.343             | 0.079                     |
|           |      | wt_342-5del_342       | 472.299              | <b>0.036</b>               | 480.649             | 0.146                     |
|           |      | wt_342-wt_Aer.g1      | -417.023             | 0.054                      | -115.694            | 0.900                     |
| Growth    | NA   | 5del_342-5del_Aer.g1  | -207.205             | <b>0.015</b>               | -111.786            | 0.824                     |
|           |      | wt_Aer.g1-5del_Aer.g1 | 369.679              | <b>0.002</b>               | 305.286             | 0.228                     |
|           |      | wt_342-5del_Aer.g1    | 57.800               | 0.461                      | 216.048             | 0.441                     |
|           |      | wt_Aer.g1-5del_342    | 576.884              | <b>0.000</b>               | 417.072             | 0.102                     |
|           |      | wt_342-5del_342       | 265.005              | <b>0.006</b>               | 327.834             | 0.193                     |
|           |      | wt_342-wt_Aer.g1      | -311.879             | <b>0.003</b>               | -89.238             | 0.897                     |
| Rate      | NA   | 5del_342-5del_Aer.g1  | -0.422               | 0.265                      | -0.235              | 0.745                     |
|           |      | wt_Aer.g1-5del_Aer.g1 | 0.134                | 0.892                      | 0.430               | 0.362                     |
|           |      | wt_342-5del_Aer.g1    | -0.224               | 0.674                      | 0.284               | 0.639                     |
|           |      | wt_Aer.g1-5del_342    | 0.556                | 0.136                      | 0.665               | 0.136                     |
|           |      | wt_342-5del_342       | 0.198                | 0.743                      | 0.519               | 0.249                     |
|           |      | wt_342-wt_Aer.g1      | -0.358               | 0.365                      | -0.146              | 0.915                     |

Supplementary Table 6: Plasmids used for energy-taxis experiments in *Pseudomonas pseudoalcaligenes* KF707.

| Plasmid                        | Description                                                                       | Reference  |
|--------------------------------|-----------------------------------------------------------------------------------|------------|
| pRK2013                        | Km <sup>R</sup> ori colE1 RK2-Mob <sup>+</sup> RK2-Tra <sup>+</sup>               | (2)        |
| pG19II                         | Gm <sup>R</sup> , <i>sacB</i> , <i>lacZ</i> , cloning vector, conjugative plasmid | (3)        |
| pG19II- $\Delta$ <i>aer-2</i>  | Gm <sup>R</sup> , <i>sacB</i> , <i>lacZ</i> , <i>aer-2</i> deletion construct     | This Study |
| pG19II- $\Delta$ <i>cttP</i>   | Gm <sup>R</sup> , <i>sacB</i> , <i>lacZ</i> , <i>cttP</i> deletion construct      | This Study |
| pG19II- $\Delta$ <i>aer.g1</i> | Gm <sup>R</sup> , <i>sacB</i> , <i>lacZ</i> , <i>aer.g1</i> deletion construct    | This Study |
| pG19II- $\Delta$ <i>aer.g2</i> | Gm <sup>R</sup> , <i>sacB</i> , <i>lacZ</i> , <i>aer.g2</i> deletion construct    | This Study |
| pG19II- $\Delta$ <i>aer.g4</i> | Gm <sup>R</sup> , <i>sacB</i> , <i>lacZ</i> , <i>aer.g4</i> deletion construct    | This Study |
| pSEVA324                       | Cm <sup>R</sup> , pR01600/ColE1, <i>lacZ</i> $\alpha$ -pUC19                      | (4)        |
| pSEVA324- <i>aer.g1</i>        | Cm <sup>R</sup> , pSEVA342 with <i>aer.g1</i> in the MCS                          | This Study |

### Supplementary References

1. **Schultz J, Copley RR, Doerks T, Ponting CP, Bork P.** 2000. SMART: a web-based tool for the study of genetically mobile domains. *Nucleic Acids Res* **28**:231–4.
2. **Figurski DH, Helinski DR.** 1979. Replication of an origin-containing derivative of plasmid RK2 dependent on a plasmid function provided in trans. *Proc Natl Acad Sci U S A* **76**:1648–52.
3. **Maseda H, Sawada I, Saito K, Uchiyama H, Nakae T, Nomura N.** 2004. Enhancement of the mexAB-oprM efflux pump expression by a quorum-sensing autoinducer and its cancellation by a regulator, MexT, of the mexEF-oprN efflux pump operon in *Pseudomonas aeruginosa*. *Antimicrob Agents Chemother* **48**:1320–8.
4. **Silva-Rocha R, Martínez-García E, Calles B, Chavarría M, Arce-Rodríguez A, De Las Heras A, Páez-Espino AD, Durante-Rodríguez G, Kim J, Nikel PI, Platero R, De Lorenzo V.** 2013. The Standard European Vector Architecture (SEVA): A coherent platform for the analysis and deployment of complex prokaryotic phenotypes. *Nucleic Acids Res* **41**:D666–D675.
